# Supplementary material
Source: publisher site journal article supplement (https://www.dovepress.com/article/344435)
Supplement: Supplementary file 1 [file get_supplementary_file.php]

# Using machine learning to identify patients at high risk of inappropriate drug dosing in periods with renal dysfunction

## Supplement

Benjamin Skov Kaas-Hansen

2 January 2022

## Contents

|                                                                                                                                                                                       |           |
|---------------------------------------------------------------------------------------------------------------------------------------------------------------------------------------|-----------|
| <b>Supplementary tables</b>                                                                                                                                                           | <b>3</b>  |
| Table S1: Maximum doses in periods when eGFR is as indicated. ATC codes in brackets. . . . .                                                                                          | 3         |
| Table S2 (extended version of table 1): Univariate summary statistics of the three data sets. Values are median (inter-quartile range) and N (%). . . . .                             | 3         |
| <b>Supplementary figures</b>                                                                                                                                                          | <b>5</b>  |
| Figure S1: Mapping of admission hour, two alternatives. . . . .                                                                                                                       | 5         |
| Figure S2: The so-called rulegraph of the our Snakemake pipeline illustrating the end-to-end workflow with dependencies between processing, training and visualisation steps. . . . . | 7         |
| <b>Optuna hyperparameter optimisation</b>                                                                                                                                             | <b>7</b>  |
| Figure S3: MLP, daily rate > 0. . . . .                                                                                                                                               | 8         |
| Figure S4: Linear, daily rate > 0. . . . .                                                                                                                                            | 9         |
| Figure S5: MLP, daily rate >= 1. . . . .                                                                                                                                              | 10        |
| Figure S6: Linear, daily rate >= 1. . . . .                                                                                                                                           | 11        |
| Figure S7: MLP, daily rate >= 2. . . . .                                                                                                                                              | 12        |
| Figure S8: Linear, daily rate >= 2. . . . .                                                                                                                                           | 13        |
| Figure S9: MLP, daily rate >= 3. . . . .                                                                                                                                              | 14        |
| Figure S10: Linear, daily rate >= 3. . . . .                                                                                                                                          | 15        |
| Figure S11: MLP, daily rate >= 5. . . . .                                                                                                                                             | 16        |
| Figure S12: Linear, daily rate >= 5. . . . .                                                                                                                                          | 17        |
| Figure S13: Ref. model, MLP, daily rate > 0. . . . .                                                                                                                                  | 18        |
| Figure S14: Ref. model, Linear, daily rate > 0. . . . .                                                                                                                               | 19        |
| Figure S15: Ref. model, MLP, daily rate >= 1. . . . .                                                                                                                                 | 20        |
| Figure S16: Ref. model, Linear, daily rate >= 1. . . . .                                                                                                                              | 21        |
| <b>ROC curves</b>                                                                                                                                                                     | <b>21</b> |
| Figure S17: MLP, daily rate > 0. . . . .                                                                                                                                              | 21        |
| Figure S18: Linear, daily rate > 0. . . . .                                                                                                                                           | 22        |
| Figure S19: MLP, daily rate >= 1. . . . .                                                                                                                                             | 22        |
| Figure S20: Linear, daily rate >= 1. . . . .                                                                                                                                          | 22        |
| Figure S21: MLP, daily rate >= 2. . . . .                                                                                                                                             | 23        |
| Figure S22: Linear, daily rate >= 2. . . . .                                                                                                                                          | 23        |
| Figure S23: MLP, daily rate >= 3. . . . .                                                                                                                                             | 23        |
| Figure S24: Linear, daily rate >= 3. . . . .                                                                                                                                          | 24        |
| Figure S25: MLP, daily rate >= 5. . . . .                                                                                                                                             | 24        |
| Figure S26: Linear, daily rate >= 5. . . . .                                                                                                                                          | 24        |

|                                                       |           |
|-------------------------------------------------------|-----------|
| Figure S27: Ref. model, MLP, daily rate $> 0$ .       | 25        |
| Figure S28: Ref. model, Linear, daily rate $> 0$ .    | 25        |
| Figure S29: Ref. model, MLP, daily rate $\geq 1$ .    | 25        |
| Figure S30: Ref. model, Linear, daily rate $\geq 1$ . | 26        |
| <b>Calibration plots</b>                              | <b>26</b> |
| Figure S31: MLP, daily rate $> 0$ .                   | 26        |
| Figure S32: Linear, daily rate $> 0$ .                | 26        |
| Figure S33: MLP, daily rate $\geq 1$ .                | 27        |
| Figure S34: Linear, daily rate $\geq 1$ .             | 27        |
| Figure S35: MLP, daily rate $\geq 2$ .                | 27        |
| Figure S36: Linear, daily rate $\geq 2$ .             | 28        |
| Figure S37: MLP, daily rate $\geq 3$ .                | 28        |
| Figure S38: Linear, daily rate $\geq 3$ .             | 28        |
| Figure S39: MLP, daily rate $\geq 5$ .                | 29        |
| Figure S40: Linear, daily rate $\geq 5$ .             | 29        |
| Figure S41: Ref. model, MLP, daily rate $> 0$ .       | 29        |
| Figure S42: Ref. model, Linear, daily rate $> 0$ .    | 30        |
| Figure S43: Ref. model, MLP, daily rate $\geq 1$ .    | 30        |
| Figure S44: Ref. model, Linear, daily rate $\geq 1$ . | 30        |
| <b>Decision curves</b>                                | <b>30</b> |
| Figure S45: MLP, daily rate $> 0$ .                   | 31        |
| Figure S46: Linear, daily rate $> 0$ .                | 31        |
| Figure S47: MLP, daily rate $\geq 1$ .                | 31        |
| Figure S48: Linear, daily rate $\geq 1$ .             | 32        |
| Figure S49: MLP, daily rate $\geq 2$ .                | 32        |
| Figure S50: Linear, daily rate $\geq 2$ .             | 32        |
| Figure S51: MLP, daily rate $\geq 3$ .                | 33        |
| Figure S52: Linear, daily rate $\geq 3$ .             | 33        |
| Figure S53: MLP, daily rate $\geq 5$ .                | 33        |
| Figure S54: Linear, daily rate $\geq 5$ .             | 34        |
| Figure S55: Ref. model, MLP, daily rate $> 0$ .       | 34        |
| Figure S56: Ref. model, Linear, daily rate $> 0$ .    | 34        |
| Figure S57: Ref. model, MLP, daily rate $\geq 1$ .    | 35        |
| Figure S58: Ref. model, Linear, daily rate $\geq 1$ . | 35        |
| <b>SHAP plots</b>                                     | <b>35</b> |
| Figure S59: MLP, daily rate $> 0$ .                   | 36        |
| Figure S60: Linear, daily rate $> 0$ .                | 38        |
| Figure S61: MLP, daily rate $\geq 1$ .                | 40        |
| Figure S62: Linear, daily rate $\geq 1$ .             | 42        |
| Figure S63: MLP, daily rate $\geq 2$ .                | 44        |
| Figure S64: Linear, daily rate $\geq 2$ .             | 46        |
| Figure S65: MLP, daily rate $\geq 3$ .                | 48        |
| Figure S66: Linear, daily rate $\geq 3$ .             | 50        |
| Figure S67: MLP, daily rate $\geq 5$ .                | 52        |
| Figure S68: Linear, daily rate $\geq 5$ .             | 54        |
| Figure S69: Ref. model, MLP, daily rate $> 0$ .       | 56        |
| Figure S70: Ref. model, Linear, daily rate $> 0$ .    | 58        |
| Figure S71: Ref. model, MLP, daily rate $\geq 1$ .    | 60        |
| Figure S72: Ref. model, Linear, daily rate $\geq 1$ . | 62        |

This document contains all supplementary tables and figures for the above-mentioned paper. The figures within each domain all share the same caption, and so to avoid cluttering captions are given only once, under the domain heading.

## Supplementary tables

**Table S1: Maximum doses in periods when eGFR is as indicated. ATC codes in brackets.**

| ##   | Drug                      | eGFR threshold | Max. daily dose |
|------|---------------------------|----------------|-----------------|
| ## 1 | Toxicity issue            | <NA>           | <NA>            |
| ## 2 | Apixaban (B01AF02)        | <U+2264> 30    | 5 mg.           |
| ## 3 | Dabigatran (B01AE07)      | <U+2264> 30    | 0 mg.           |
| ## 4 | Rivaroxaban (B01AF01)     | <U+2264> 30    | 0 mg.           |
| ## 5 | Metformin (A10BA02)       | <U+2264> 30    | 0 mg.           |
| ## 6 | Ibuprofene (M01AE01)      | <U+2264> 30    | 0 mg.           |
| ## 7 | Celecoxib (M01AH01)       | <U+2264> 30    | 0 mg.           |
| ## 8 | Methotrexate (L04AX03)    | <U+2264> 30    | 0 mg.           |
| ## 9 | Lithium citrate (N05AN01) | <U+2264> 30    | 0 mg.           |

**Table S2 (extended version of table 1): Univariate summary statistics of the three data sets. Values are median (inter-quartile range) and N (%).**

| ##    | variate                                | develop        | test           | test_new       | in_table1 |
|-------|----------------------------------------|----------------|----------------|----------------|-----------|
| ## 1  | n                                      | 42250          | 10201          | 5980           | yes       |
| ## 2  | time_at_risk (median [IQR])            | 3.5 [1.7, 7.7] | 3.5 [1.7, 7.2] | 2.9 [1.5, 6.4] | yes       |
| ## 3  | daily_rate_not_zero (%)                | 3786 (9.0)     | 1080 (10.6)    | 740 (12.4)     | yes       |
| ## 4  | daily_rate_geq_1 (%)                   | 2241 (5.3)     | 588 (5.8)      | 333 (5.6)      | yes       |
| ## 5  | daily_rate_geq_2 (%)                   | 1236 (2.9)     | 288 (2.8)      | 108 (1.8)      | yes       |
| ## 6  | daily_rate_geq_3 (%)                   | 783 (1.9)      | 171 (1.7)      | 56 (0.9)       | yes       |
| ## 7  | daily_rate_geq_5 (%)                   | 366 (0.9)      | 64 (0.6)       | 9 (0.2)        | yes       |
| ## 8  | inapp_dose_of_M01AE01 (%)              | 1713 (4.1)     | 343 (3.4)      | 244 (4.1)      | yes       |
| ## 9  | inapp_dose_of_M01AH01 (%)              | 67 (0.2)       | 21 (0.2)       | 18 (0.3)       | yes       |
| ## 10 | inapp_dose_of_B01AF01 (%)              | 341 (0.8)      | 174 (1.7)      | 115 (1.9)      | yes       |
| ## 11 | inapp_dose_of_A10BA02 (%)              | 1452 (3.4)     | 340 (3.3)      | 277 (4.6)      | yes       |
| ## 12 | inapp_dose_of_B01AE07 (%)              | 257 (0.6)      | 76 (0.7)       | 55 (0.9)       | yes       |
| ## 13 | inapp_dose_of_N05AN01 (%)              | 68 (0.2)       | 17 (0.2)       | 12 (0.2)       | yes       |
| ## 14 | inapp_dose_of_L04AX03 (%)              | 19 (0.0)       | 5 (0.0)        | <5             | yes       |
| ## 15 | inapp_dose_of_B01AF02 (%)              | 124 (0.3)      | 184 (1.8)      | 73 (1.2)       | yes       |
| ## 16 | n_previous_admissions (%): 0           | 4988 (11.8)    | 1082 (10.6)    | 1074 (18.0)    | yes       |
| ## 17 | n_previous_admissions (%): 1-2         | 10100 (23.9)   | 2367 (23.2)    | 1873 (31.3)    | yes       |
| ## 18 | n_previous_admissions (%): 3-4         | 7712 (18.3)    | 1919 (18.8)    | 1232 (20.6)    | yes       |
| ## 19 | n_previous_admissions (%): 5-6         | 5490 (13.0)    | 1303 (12.8)    | 685 (11.5)     | yes       |
| ## 20 | n_previous_admissions (%): >6          | 13960 (33.0)   | 3530 (34.6)    | 1116 (18.7)    | yes       |
| ## 21 | n_distinct_drugs_before_index (%): 0   | 6165 (14.6)    | 1228 (12.0)    | 762 (12.7)     | yes       |
| ## 22 | n_distinct_drugs_before_index (%): 1-2 | 9111 (21.6)    | 1984 (19.4)    | 1254 (21.0)    | yes       |
| ## 23 | n_distinct_drugs_before_index (%): 3-4 | 8761 (20.7)    | 2078 (20.4)    | 1355 (22.7)    | yes       |
| ## 24 | n_distinct_drugs_before_index (%): 5-6 | 7197 (17.0)    | 1852 (18.2)    | 1095 (18.3)    | yes       |
| ## 25 | n_distinct_drugs_before_index (%): >6  | 11016 (26.1)   | 3059 (30.0)    | 1514 (25.3)    | yes       |
| ## 26 | admitted_tue (%)                       | 7092 (16.8)    | 1755 (17.2)    | 1016 (17.0)    | yes       |
| ## 27 | admitted_mon (%)                       | 7667 (18.1)    | 1803 (17.7)    | 1066 (17.8)    | yes       |
| ## 28 | admitted_thu (%)                       | 6665 (15.8)    | 1626 (15.9)    | 927 (15.5)     | yes       |
| ## 29 | admitted_sat (%)                       | 3809 (9.0)     | 960 (9.4)      | 606 (10.1)     | yes       |
| ## 30 | admitted_sun (%)                       | 4140 (9.8)     | 989 (9.7)      | 598 (10.0)     | yes       |
| ## 31 | admitted_wed (%)                       | 6718 (15.9)    | 1616 (15.8)    | 936 (15.7)     | yes       |
| ## 32 | admitted_fri (%)                       | 6159 (14.6)    | 1452 (14.2)    | 831 (13.9)     | yes       |
| ## 33 | n_persons (%)                          | 27253 (64.5)   | 8412 (82.5)    | 5341 (89.3)    | yes       |
| ## 34 | n_women (%)                            | 13759 (32.6)   | 4049 (39.7)    | 2629 (44.0)    | yes       |
| ## 35 | n18_diag_any (%)                       | 13470 (31.9)   | 3391 (33.2)    | 732 (12.2)     | yes       |
| ## 36 | icd10_chapter_4 (%)                    | 19716 (46.7)   | 5096 (50.0)    | 2415 (40.4)    | yes       |

|        |                                       |                   |                   |                   |     |
|--------|---------------------------------------|-------------------|-------------------|-------------------|-----|
| ## 37  | icd10_chapter_9 (%)                   | 25757 (61.0)      | 6392 (62.7)       | 3283 (54.9)       | yes |
| ## 38  | icd10_chapter_14 (%)                  | 23025 (54.5)      | 5819 (57.0)       | 2306 (38.6)       | yes |
| ## 39  | icd10_chapter_18 (%)                  | 18663 (44.2)      | 5711 (56.0)       | 2882 (48.2)       | yes |
| ## 40  | icd10_chapter_19 (%)                  | 20275 (48.0)      | 4749 (46.6)       | 2481 (41.5)       | yes |
| ## 41  | atc_level2_A02 (%)                    | 10635 (25.2)      | 2776 (27.2)       | 1407 (23.5)       | yes |
| ## 42  | atc_level2_B01 (%)                    | 11842 (28.0)      | 3181 (31.2)       | 1795 (30.0)       | yes |
| ## 43  | atc_level2_C03 (%)                    | 13966 (33.1)      | 3672 (36.0)       | 1951 (32.6)       | yes |
| ## 44  | atc_level2_J01 (%)                    | 14719 (34.8)      | 3257 (31.9)       | 1938 (32.4)       | yes |
| ## 45  | atc_level2_N02 (%)                    | 15740 (37.3)      | 4367 (42.8)       | 2506 (41.9)       | yes |
| ## 46  | r (%): 0                              | 38464 (91.0)      | 9121 (89.4)       | 5240 (87.6)       | no  |
| ## 47  | r (%): 1-2                            | 1282 (3.0)        | 446 (4.4)         | 391 (6.5)         | no  |
| ## 48  | r (%): 3-4                            | 670 (1.6)         | 200 (2.0)         | 134 (2.2)         | no  |
| ## 49  | r (%): 5-6                            | 431 (1.0)         | 116 (1.1)         | 75 (1.3)          | no  |
| ## 50  | r (%): >6                             | 1403 (3.3)        | 318 (3.1)         | 140 (2.3)         | no  |
| ## 51  | age_at_admission (median [IQR])       | 76.9 [66.6, 85.1] | 77.4 [68.2, 85.5] | 78.5 [69.3, 86.2] | no  |
| ## 52  | hour_of_admission_cyclical (%): 0     | 3560 (8.4)        | 884 (8.7)         | 514 (8.6)         | no  |
| ## 53  | hour_of_admission_cyclical (%): 1-3   | 18460 (43.7)      | 4521 (44.3)       | 2727 (45.6)       | no  |
| ## 54  | hour_of_admission_cyclical (%): 4-6   | 12209 (28.9)      | 2886 (28.3)       | 1629 (27.2)       | no  |
| ## 55  | hour_of_admission_cyclical (%): 7-9   | 5367 (12.7)       | 1250 (12.3)       | 712 (11.9)        | no  |
| ## 56  | hour_of_admission_cyclical (%): 10-12 | 2654 (6.3)        | 660 (6.5)         | 398 (6.7)         | no  |
| ## 57  | sex_female (%)                        | 20743 (49.1)      | 4854 (47.6)       | 2940 (49.2)       | no  |
| ## 58  | sex_male (%)                          | 21507 (50.9)      | 5347 (52.4)       | 3040 (50.8)       | no  |
| ## 59  | n18_diag_N189 (%)                     | 13228 (31.3)      | 3242 (31.8)       | 694 (11.6)        | no  |
| ## 60  | n18_diag_N185 (%)                     | 1970 (4.7)        | 868 (8.5)         | 62 (1.0)          | no  |
| ## 61  | n18_diag_N184 (%)                     | 385 (0.9)         | 223 (2.2)         | 23 (0.4)          | no  |
| ## 62  | n18_diag_N183 (%)                     | 161 (0.4)         | 138 (1.4)         | 30 (0.5)          | no  |
| ## 63  | n18_diag_N181 (%)                     | 44 (0.1)          | 34 (0.3)          | <5                | no  |
| ## 64  | n18_diag_N182 (%)                     | 61 (0.1)          | 36 (0.4)          | 9 (0.2)           | no  |
| ## 65  | elixhauser_score_ahrq (%): 0          | 10419 (24.7)      | 2261 (22.2)       | 1881 (31.5)       | no  |
| ## 66  | elixhauser_score_ahrq (%): 1-2        | 1900 (4.5)        | 432 (4.2)         | 273 (4.6)         | no  |
| ## 67  | elixhauser_score_ahrq (%): 3-4        | 2078 (4.9)        | 496 (4.9)         | 356 (6.0)         | no  |
| ## 68  | elixhauser_score_ahrq (%): 5-6        | 4725 (11.2)       | 1092 (10.7)       | 609 (10.2)        | no  |
| ## 69  | elixhauser_score_ahrq (%): >6         | 23128 (54.7)      | 5920 (58.0)       | 2861 (47.8)       | no  |
| ## 70  | icd10_chapter_1 (%)                   | 10263 (24.3)      | 2662 (26.1)       | 954 (16.0)        | no  |
| ## 71  | icd10_chapter_2 (%)                   | 10386 (24.6)      | 2748 (26.9)       | 1410 (23.6)       | no  |
| ## 72  | icd10_chapter_3 (%)                   | 9226 (21.8)       | 2285 (22.4)       | 920 (15.4)        | no  |
| ## 73  | icd10_chapter_5 (%)                   | 7673 (18.2)       | 1979 (19.4)       | 1059 (17.7)       | no  |
| ## 74  | icd10_chapter_6 (%)                   | 7129 (16.9)       | 1992 (19.5)       | 992 (16.6)        | no  |
| ## 75  | icd10_chapter_7 (%)                   | 11452 (27.1)      | 2901 (28.4)       | 1495 (25.0)       | no  |
| ## 76  | icd10_chapter_8 (%)                   | 5392 (12.8)       | 1203 (11.8)       | 650 (10.9)        | no  |
| ## 77  | icd10_chapter_10 (%)                  | 15905 (37.6)      | 4131 (40.5)       | 1930 (32.3)       | no  |
| ## 78  | icd10_chapter_11 (%)                  | 16451 (38.9)      | 4136 (40.5)       | 1921 (32.1)       | no  |
| ## 79  | icd10_chapter_12 (%)                  | 6220 (14.7)       | 1597 (15.7)       | 680 (11.4)        | no  |
| ## 80  | icd10_chapter_13 (%)                  | 16131 (38.2)      | 4123 (40.4)       | 2107 (35.2)       | no  |
| ## 81  | icd10_chapter_15 (%)                  | 159 (0.4)         | 25 (0.2)          | 11 (0.2)          | no  |
| ## 82  | icd10_chapter_16 (%)                  | 38 (0.1)          | 11 (0.1)          | 5 (0.1)           | no  |
| ## 83  | icd10_chapter_17 (%)                  | 1348 (3.2)        | 312 (3.1)         | 93 (1.6)          | no  |
| ## 84  | icd10_chapter_20 (%)                  | 9 (0.0)           | <5                | <5                | no  |
| ## 85  | icd10_chapter_21 (%)                  | 37872 (89.6)      | 9254 (90.7)       | 5221 (87.3)       | no  |
| ## 86  | atc_level2_A03 (%)                    | 1819 (4.3)        | 395 (3.9)         | 249 (4.2)         | no  |
| ## 87  | atc_level2_A04 (%)                    | 792 (1.9)         | 307 (3.0)         | 200 (3.3)         | no  |
| ## 88  | atc_level2_A06 (%)                    | 2129 (5.0)        | 523 (5.1)         | 256 (4.3)         | no  |
| ## 89  | atc_level2_A07 (%)                    | 701 (1.7)         | 185 (1.8)         | 95 (1.6)          | no  |
| ## 90  | atc_level2_A09 (%)                    | 22 (0.1)          | 9 (0.1)           | 5 (0.1)           | no  |
| ## 91  | atc_level2_A10 (%)                    | 5270 (12.5)       | 1500 (14.7)       | 814 (13.6)        | no  |
| ## 92  | atc_level2_A11 (%)                    | 4752 (11.2)       | 1410 (13.8)       | 558 (9.3)         | no  |
| ## 93  | atc_level2_A12 (%)                    | 8578 (20.3)       | 2330 (22.8)       | 1182 (19.8)       | no  |
| ## 94  | atc_level2_A16 (%)                    | 6 (0.0)           | 5 (0.0)           | 0 (0.0)           | no  |
| ## 95  | atc_level2_B02 (%)                    | 1271 (3.0)        | 295 (2.9)         | 184 (3.1)         | no  |
| ## 96  | atc_level2_B03 (%)                    | 3513 (8.3)        | 946 (9.3)         | 385 (6.4)         | no  |
| ## 97  | atc_level2_B05 (%)                    | 4884 (11.6)       | 1643 (16.1)       | 1074 (18.0)       | no  |
| ## 98  | atc_level2_C01 (%)                    | 4318 (10.2)       | 1068 (10.5)       | 588 (9.8)         | no  |
| ## 99  | atc_level2_C02 (%)                    | 563 (1.3)         | 155 (1.5)         | 45 (0.8)          | no  |
| ## 100 | atc_level2_C07 (%)                    | 8491 (20.1)       | 2362 (23.2)       | 1189 (19.9)       | no  |
| ## 101 | atc_level2_C08 (%)                    | 4606 (10.9)       | 1221 (12.0)       | 607 (10.2)        | no  |
| ## 102 | atc_level2_C09 (%)                    | 4717 (11.2)       | 1183 (11.6)       | 751 (12.6)        | no  |
| ## 103 | atc_level2_C10 (%)                    | 5698 (13.5)       | 1479 (14.5)       | 820 (13.7)        | no  |
| ## 104 | atc_level2_D01 (%)                    | 23 (0.1)          | 9 (0.1)           | <5                | no  |

|        |                    |             |             |            |    |
|--------|--------------------|-------------|-------------|------------|----|
| ## 105 | atc_level2_D07 (%) | 29 (0.1)    | 8 (0.1)     | <5         | no |
| ## 106 | atc_level2_G03 (%) | 83 (0.2)    | 29 (0.3)    | 19 (0.3)   | no |
| ## 107 | atc_level2_G04 (%) | 836 (2.0)   | 265 (2.6)   | 150 (2.5)  | no |
| ## 108 | atc_level2_H01 (%) | 84 (0.2)    | 15 (0.1)    | 12 (0.2)   | no |
| ## 109 | atc_level2_H02 (%) | 3867 (9.2)  | 1054 (10.3) | 575 (9.6)  | no |
| ## 110 | atc_level2_H03 (%) | 1600 (3.8)  | 477 (4.7)   | 267 (4.5)  | no |
| ## 111 | atc_level2_H05 (%) | 236 (0.6)   | 62 (0.6)    | 5 (0.1)    | no |
| ## 112 | atc_level2_J02 (%) | 286 (0.7)   | 84 (0.8)    | 70 (1.2)   | no |
| ## 113 | atc_level2_J04 (%) | 22 (0.1)    | <5          | 0 (0.0)    | no |
| ## 114 | atc_level2_J05 (%) | 244 (0.6)   | 65 (0.6)    | 36 (0.6)   | no |
| ## 115 | atc_level2_J06 (%) | 23 (0.1)    | 7 (0.1)     | <5         | no |
| ## 116 | atc_level2_L01 (%) | 121 (0.3)   | 27 (0.3)    | 15 (0.3)   | no |
| ## 117 | atc_level2_L02 (%) | 166 (0.4)   | 61 (0.6)    | 34 (0.6)   | no |
| ## 118 | atc_level2_L03 (%) | 12 (0.0)    | <5          | <5         | no |
| ## 119 | atc_level2_L04 (%) | 964 (2.3)   | 207 (2.0)   | 46 (0.8)   | no |
| ## 120 | atc_level2_M01 (%) | 1628 (3.9)  | 401 (3.9)   | 308 (5.2)  | no |
| ## 121 | atc_level2_M03 (%) | 247 (0.6)   | 93 (0.9)    | 62 (1.0)   | no |
| ## 122 | atc_level2_M04 (%) | 2341 (5.5)  | 700 (6.9)   | 276 (4.6)  | no |
| ## 123 | atc_level2_M05 (%) | 99 (0.2)    | 24 (0.2)    | 17 (0.3)   | no |
| ## 124 | atc_level2_N01 (%) | 378 (0.9)   | 99 (1.0)    | 61 (1.0)   | no |
| ## 125 | atc_level2_N03 (%) | 1917 (4.5)  | 557 (5.5)   | 281 (4.7)  | no |
| ## 126 | atc_level2_N04 (%) | 174 (0.4)   | 42 (0.4)    | 22 (0.4)   | no |
| ## 127 | atc_level2_N05 (%) | 5284 (12.5) | 1454 (14.3) | 823 (13.8) | no |
| ## 128 | atc_level2_N06 (%) | 3314 (7.8)  | 843 (8.3)   | 424 (7.1)  | no |
| ## 129 | atc_level2_N07 (%) | 260 (0.6)   | 87 (0.9)    | 42 (0.7)   | no |
| ## 130 | atc_level2_P01 (%) | 1456 (3.4)  | 268 (2.6)   | 125 (2.1)  | no |
| ## 131 | atc_level2_R01 (%) | 19 (0.0)    | 10 (0.1)    | 5 (0.1)    | no |
| ## 132 | atc_level2_R03 (%) | 627 (1.5)   | 191 (1.9)   | 113 (1.9)  | no |
| ## 133 | atc_level2_R05 (%) | 691 (1.6)   | 113 (1.1)   | 60 (1.0)   | no |
| ## 134 | atc_level2_R06 (%) | 974 (2.3)   | 262 (2.6)   | 96 (1.6)   | no |
| ## 135 | atc_level2_S01 (%) | 169 (0.4)   | 40 (0.4)    | 22 (0.4)   | no |
| ## 136 | atc_level2_V03 (%) | 2827 (6.7)  | 748 (7.3)   | 279 (4.7)  | no |
| ## 137 | atc_level2_V08 (%) | 37 (0.1)    | 6 (0.1)     | 5 (0.1)    | no |

## Supplementary figures

### Figure S1: Mapping of admission hour, two alternatives.

Top: Mapping of admission hour (x axis) to unit circle (blue) and distance from midday (red). Bottom: The unit-circle mapping loses the interval nature of the admission hour on the original scale, whereas the distance-to-midday maintains this quality.

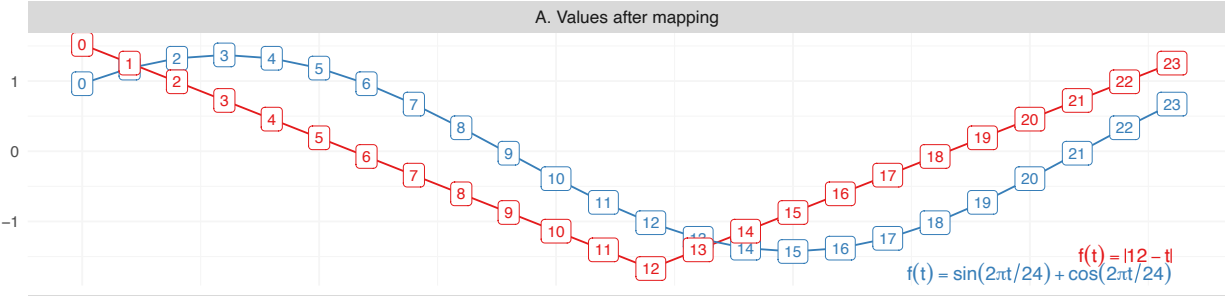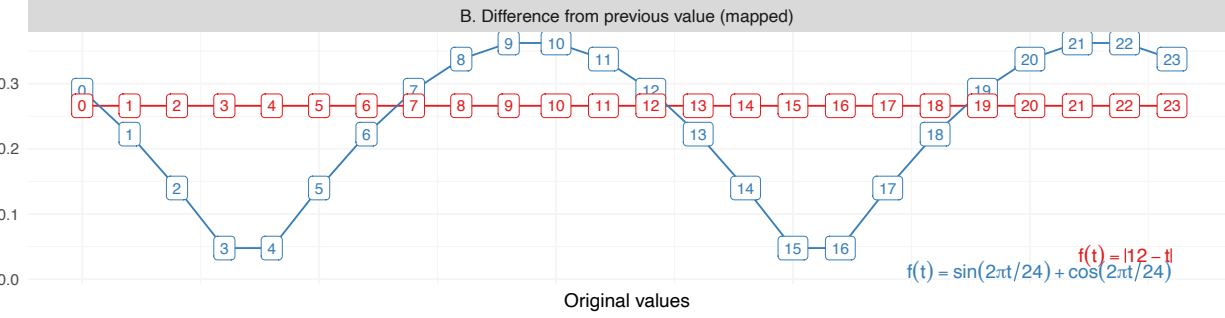

Figure S2: The so-called rulegraph of the our Snakemake pipeline illustrating the end-to-end workflow with dependencies between processing, training and visualisation steps.

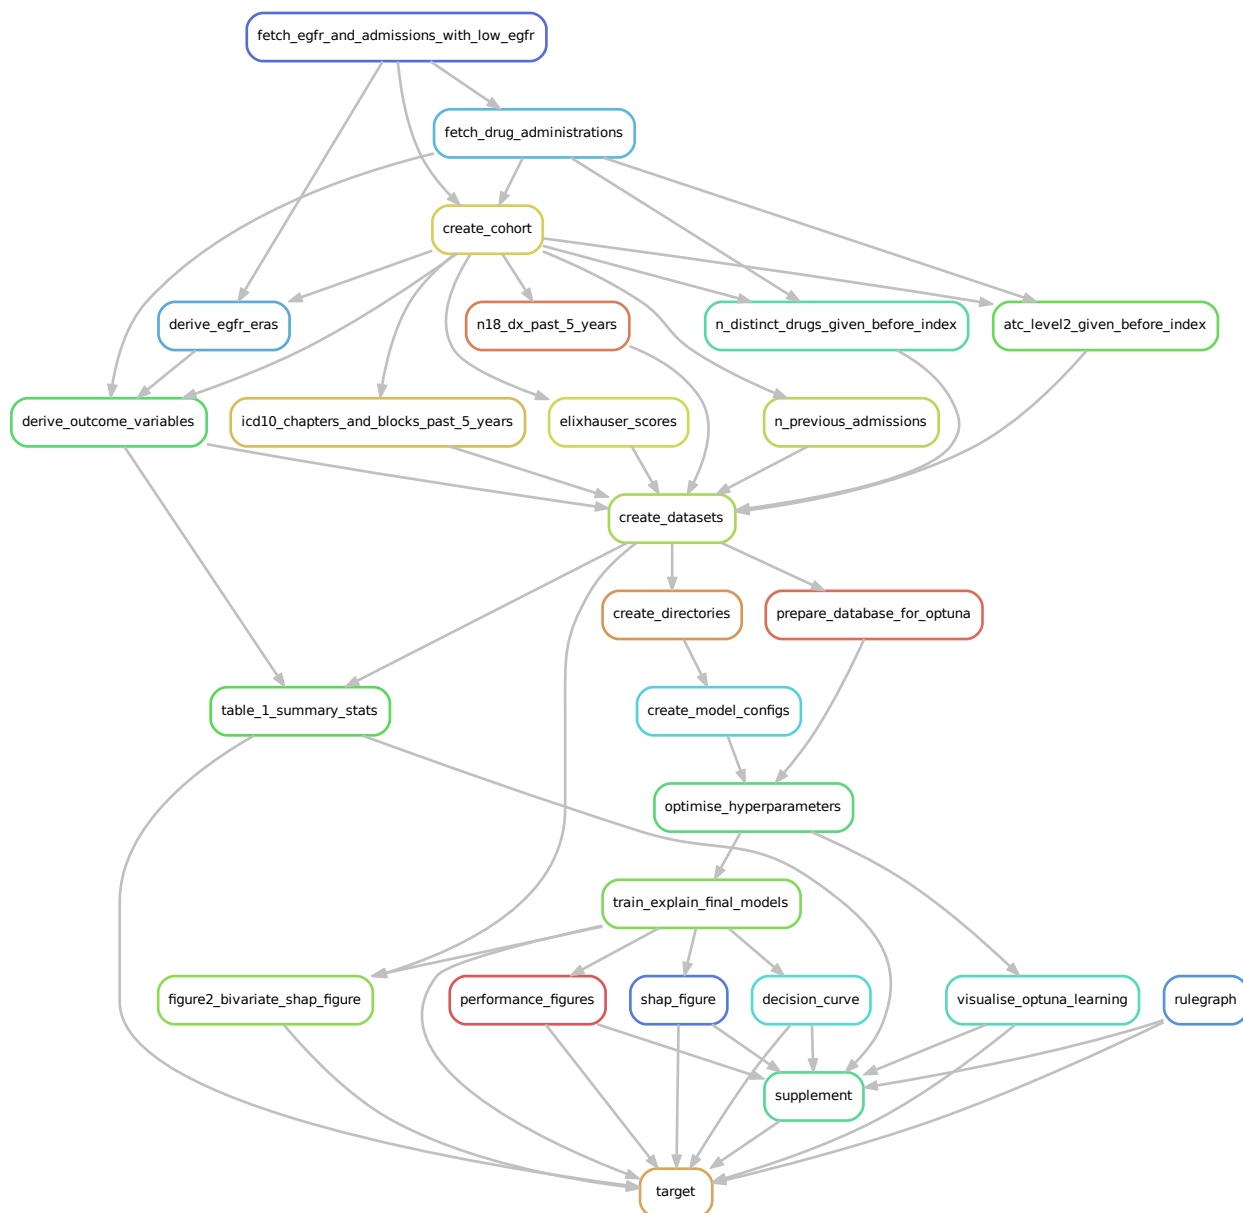

## Optuna hyperparameter optimisation

Sampled hyperparameter configurations. Point colours represent the loss value: blue = low (preferable), red = high, grey = above the third quartile. Dashed lines indicate the best configuration.

Figure S3: MLP, daily rate > 0.

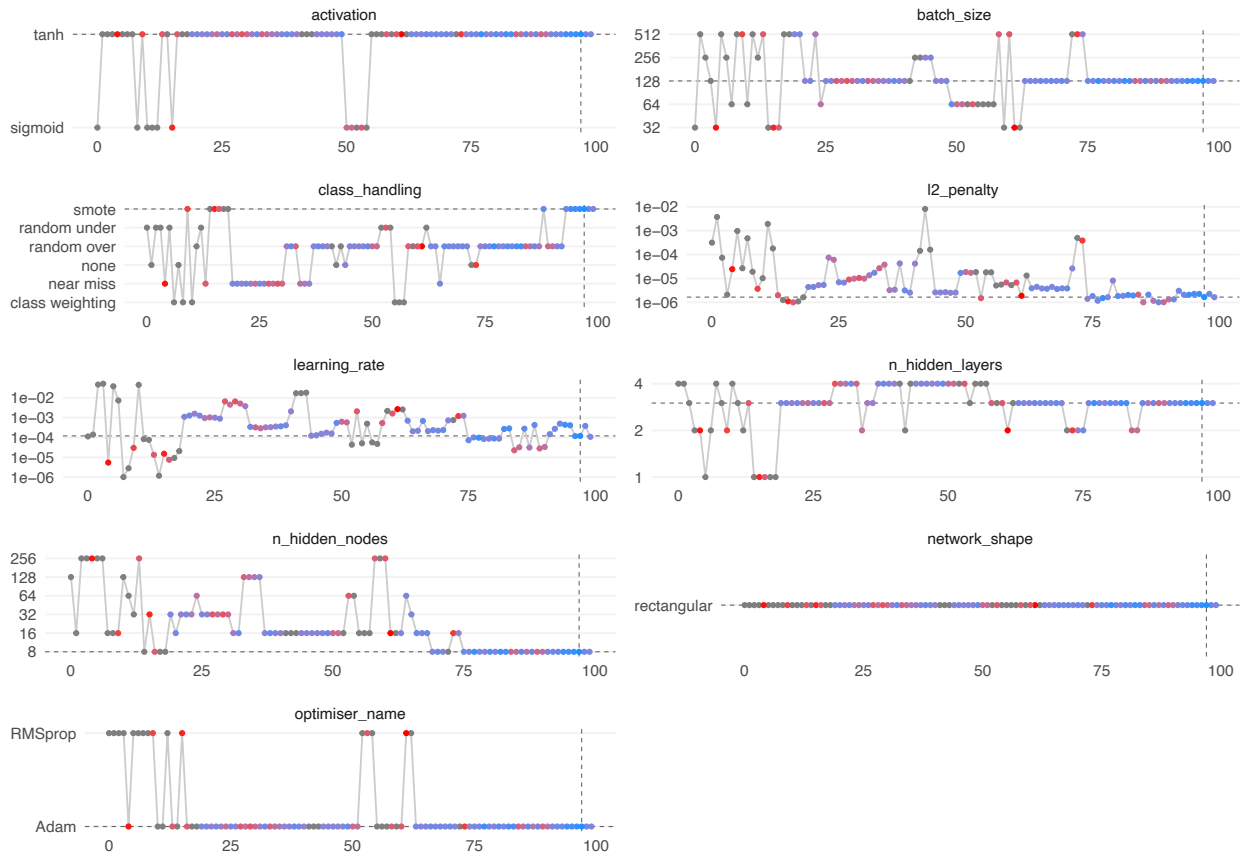



Figure S4: Linear, daily rate  $> 0$ .

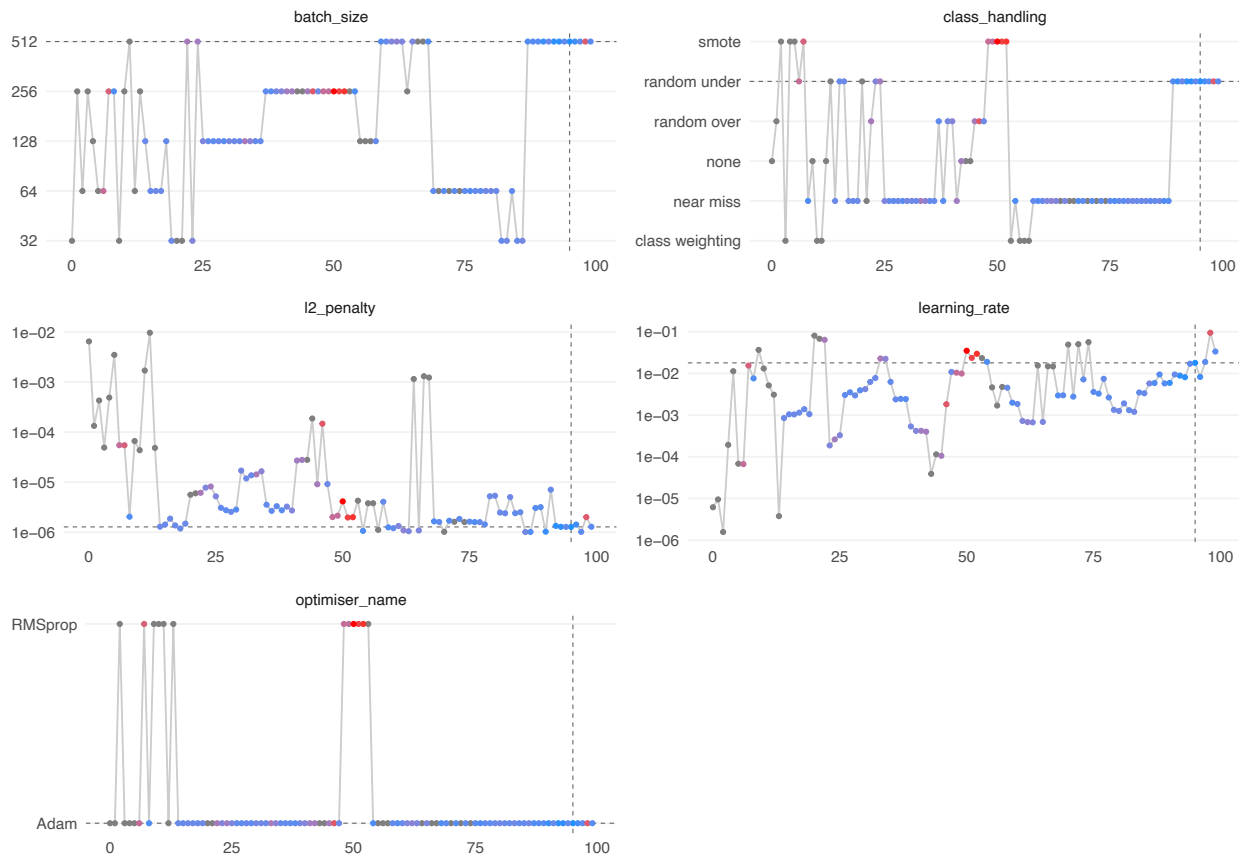

Figure S5: MLP, daily rate  $\geq 1$ .

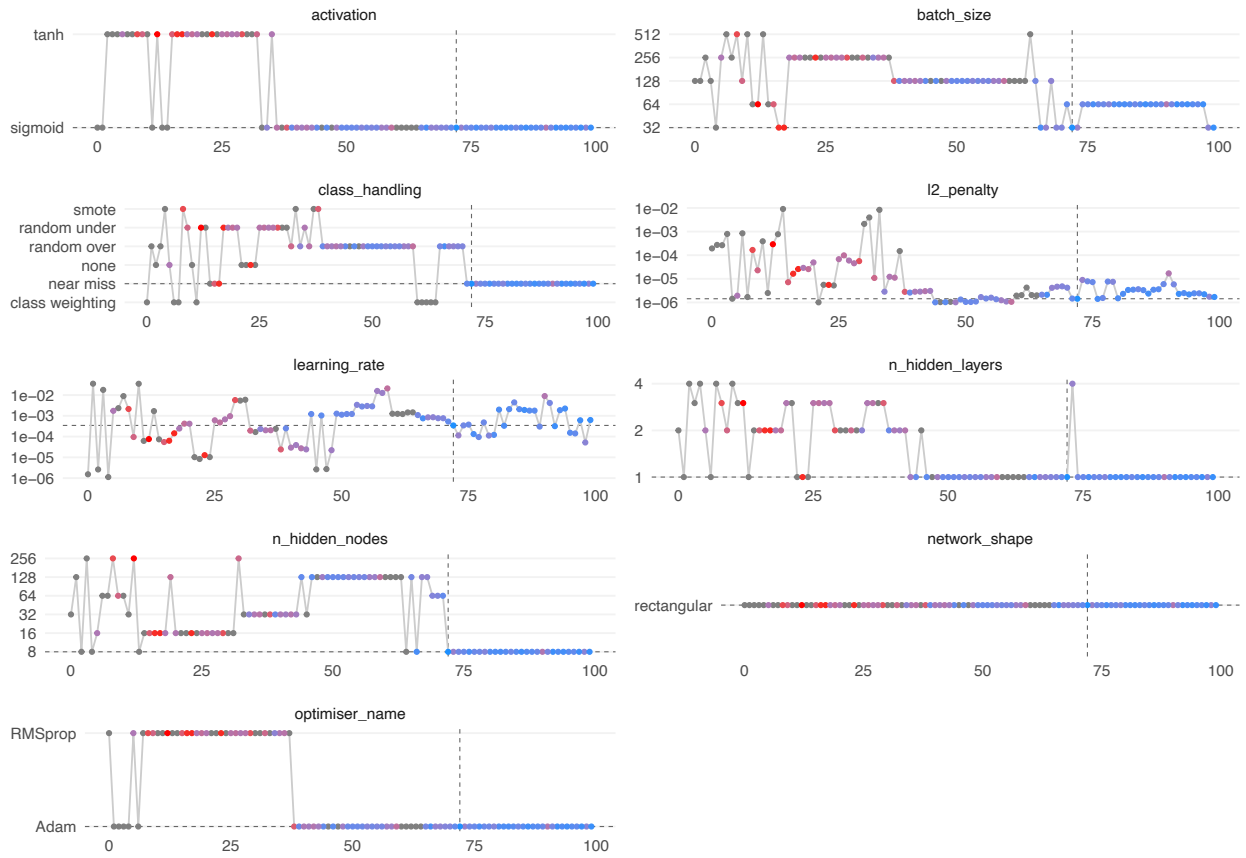

Figure S6: Linear, daily rate  $\geq 1$ .

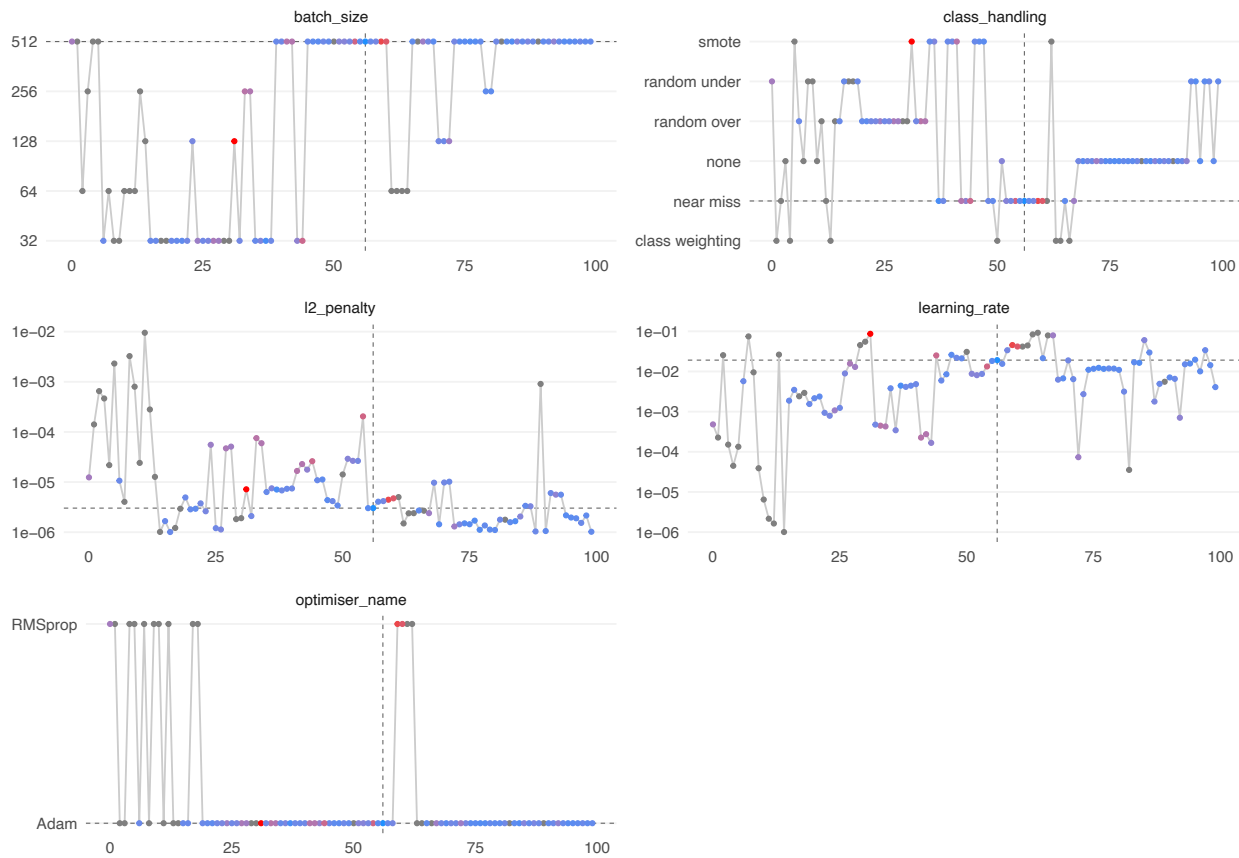

Figure S7: MLP, daily rate  $\geq 2$ .

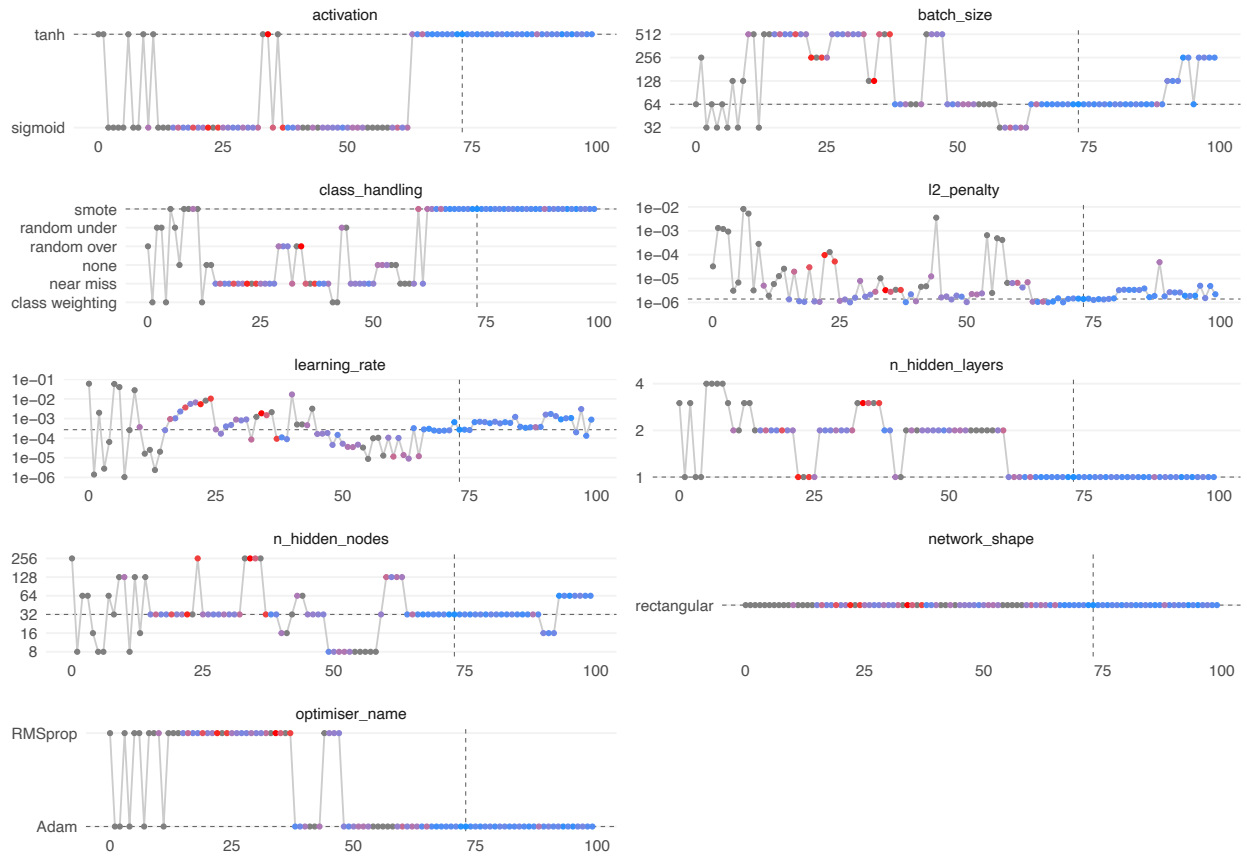

Figure S8: Linear, daily rate  $\geq 2$ .

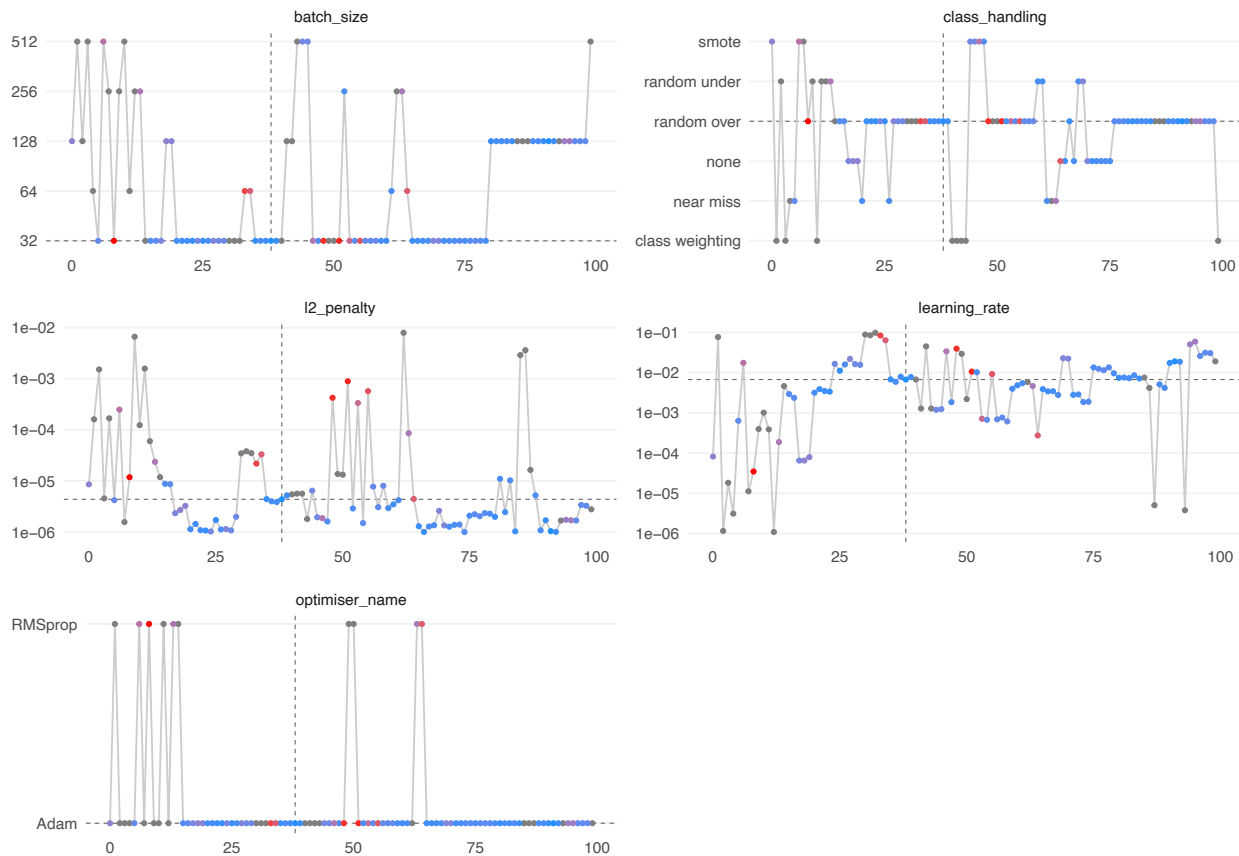

Figure S9: MLP, daily rate  $\geq 3$ .

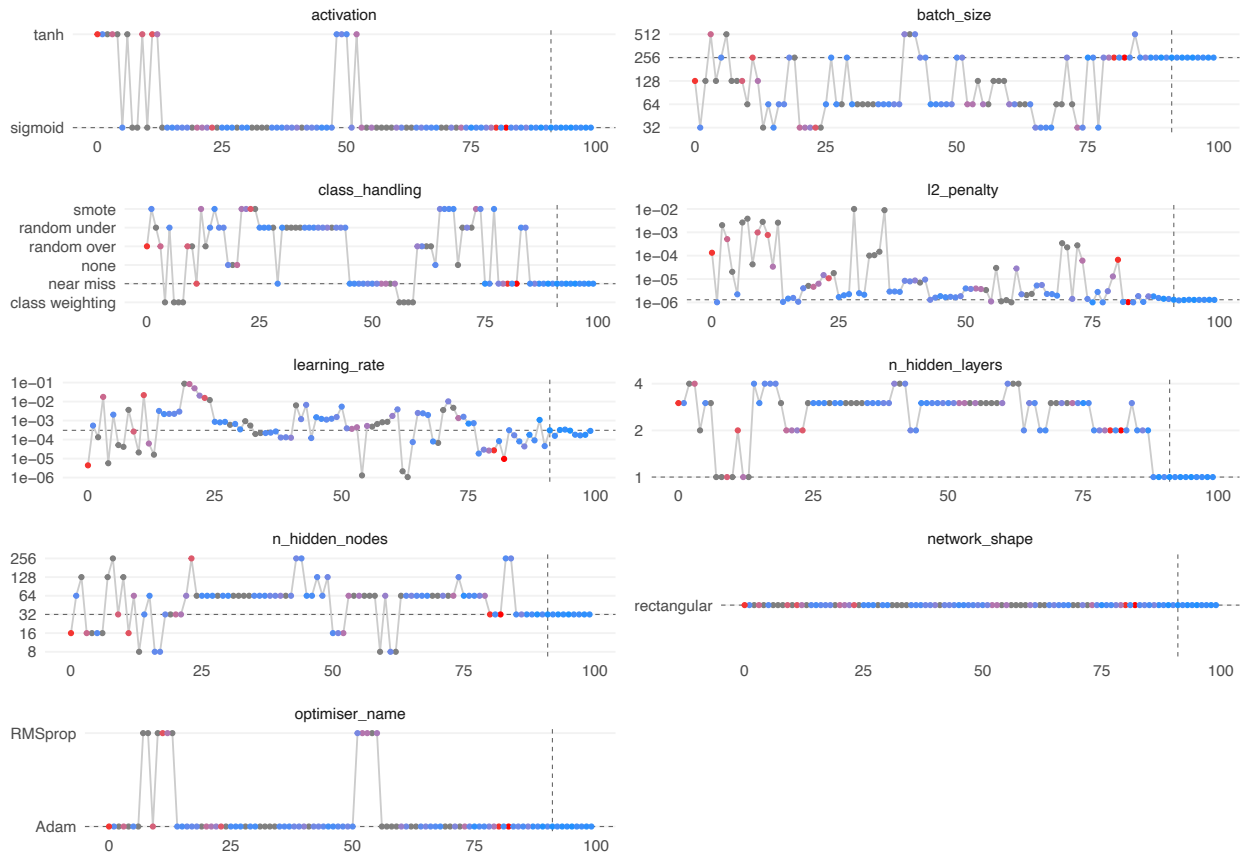

Figure S10: Linear, daily rate  $\geq 3$ .

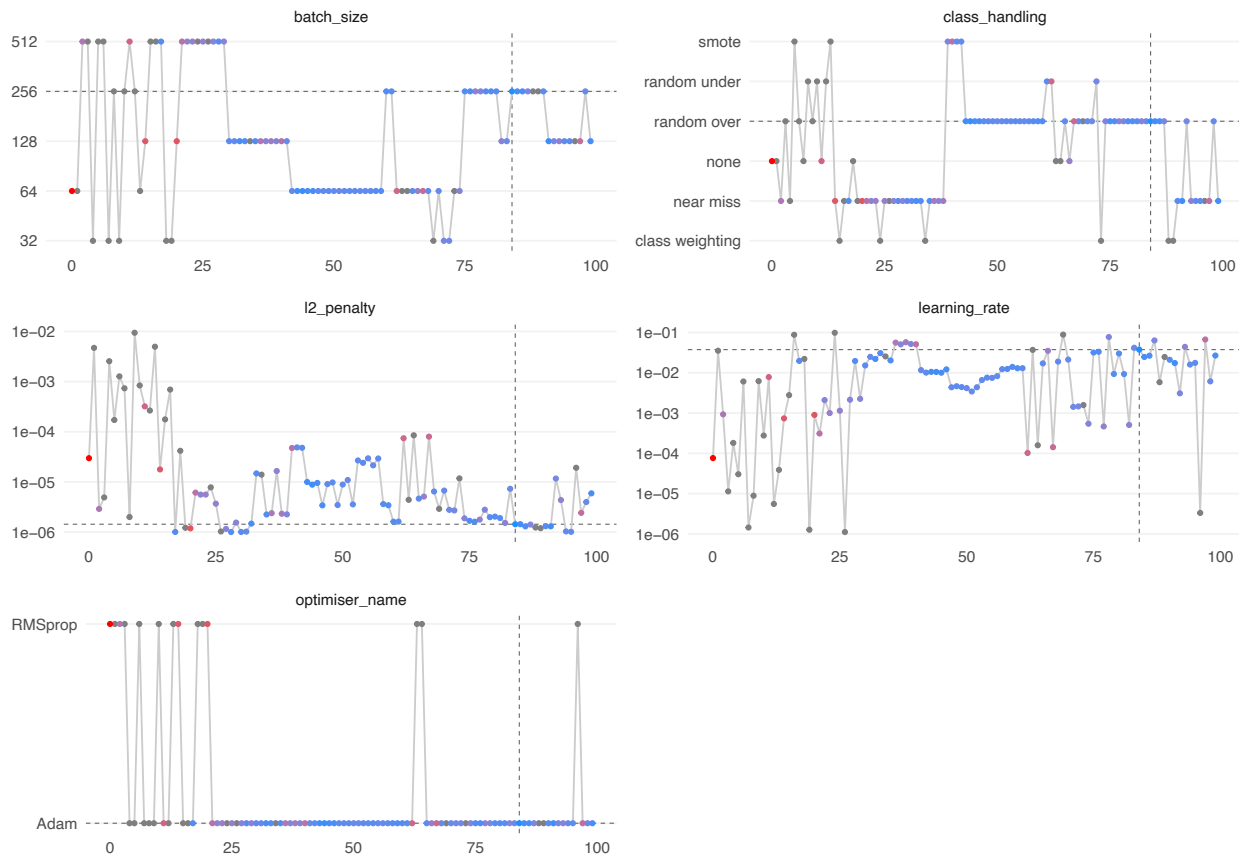

Figure S11: MLP, daily rate  $\geq 5$ .

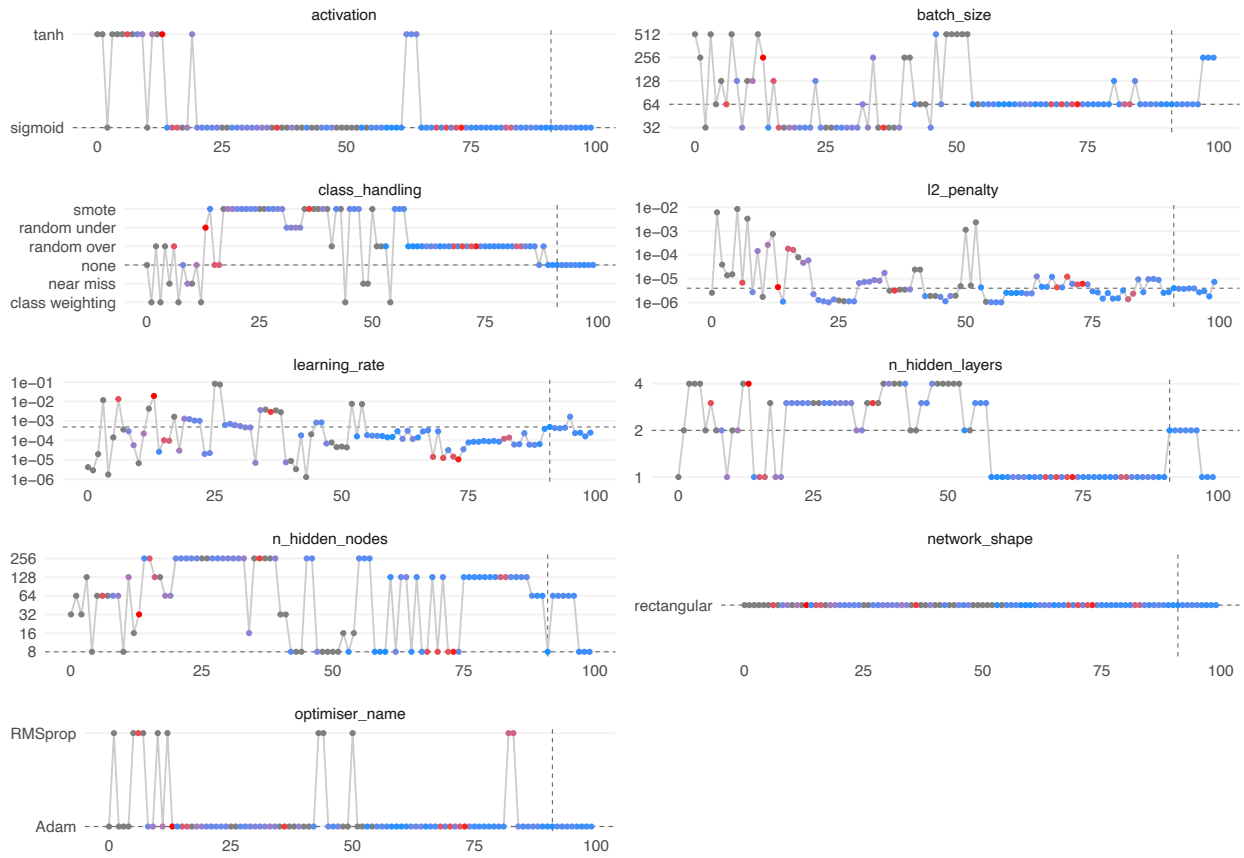



Figure S12: Linear, daily rate  $\geq 5$ .

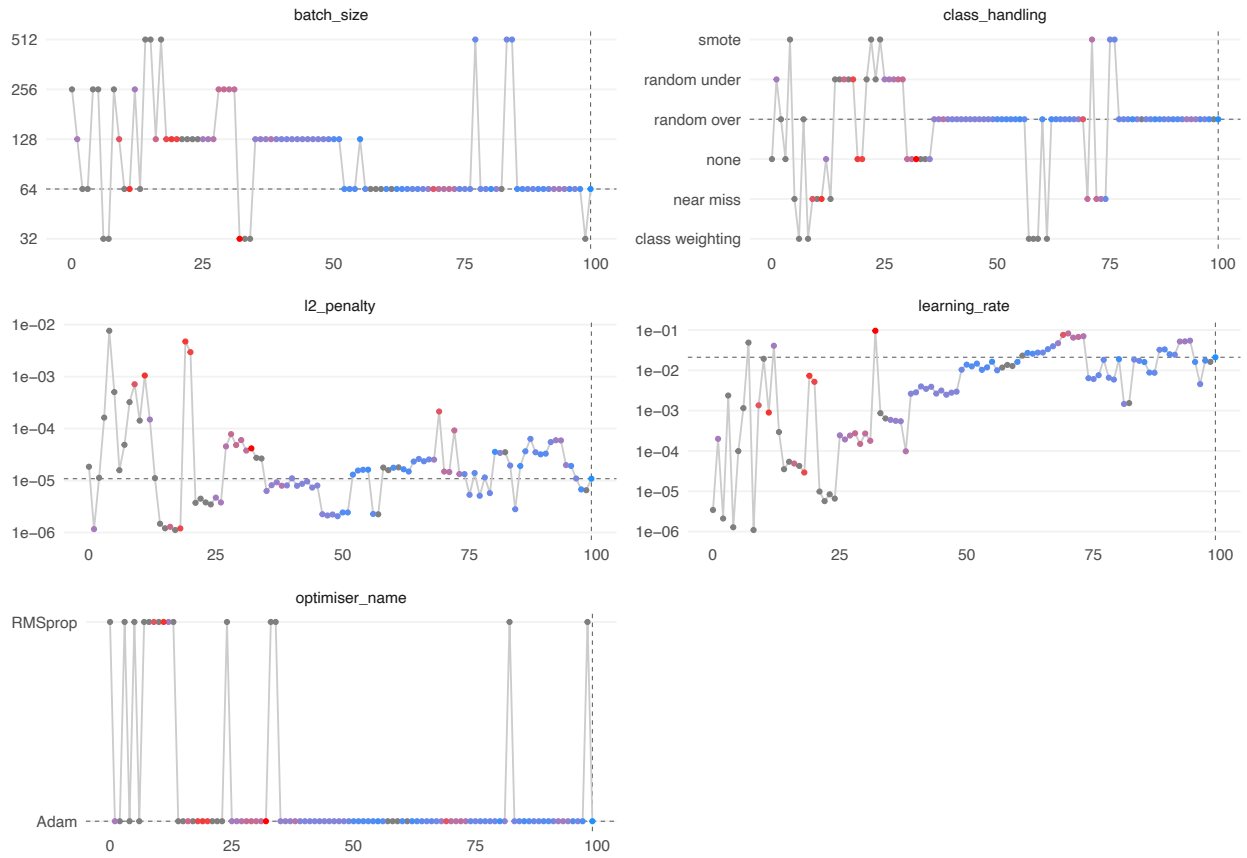

Figure S13: Ref. model, MLP, daily rate  $> 0$ .

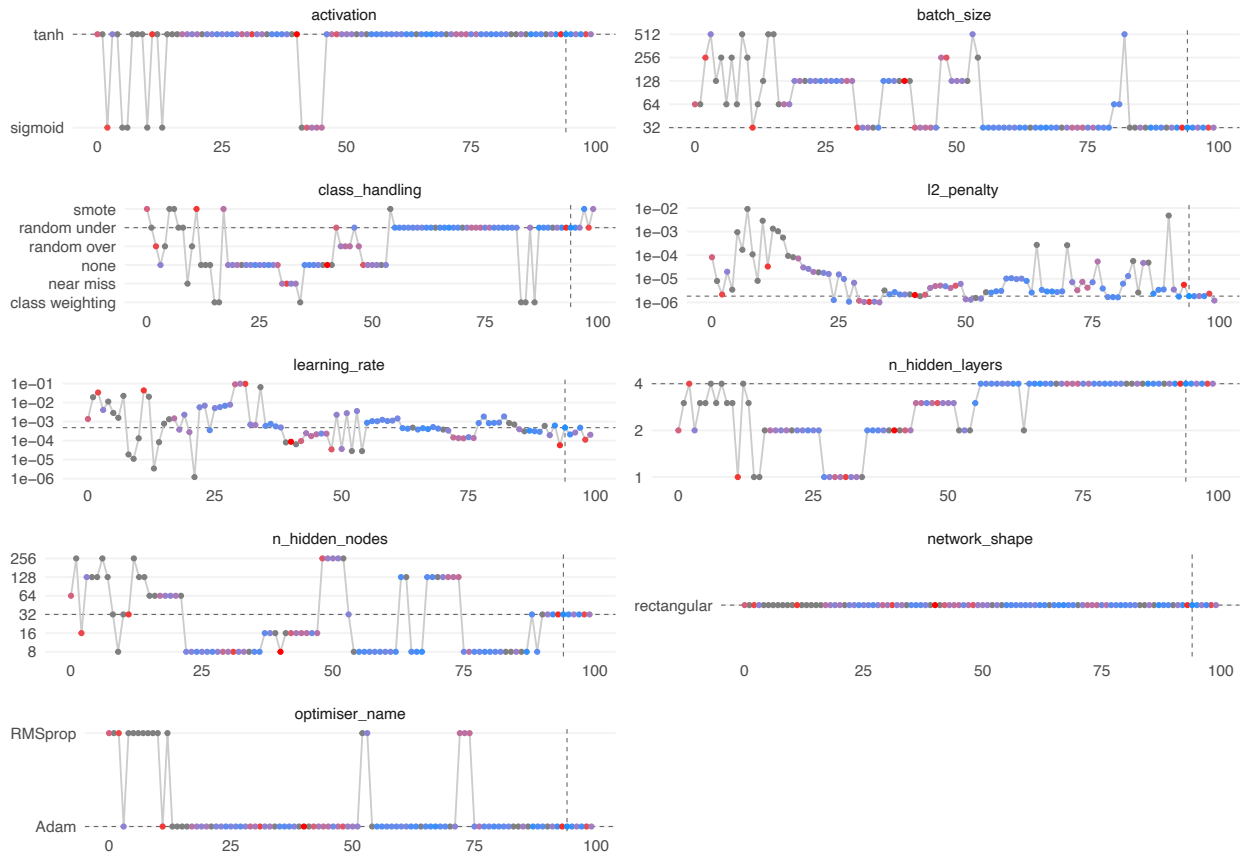

Figure S14: Ref. model, Linear, daily rate  $> 0$ .

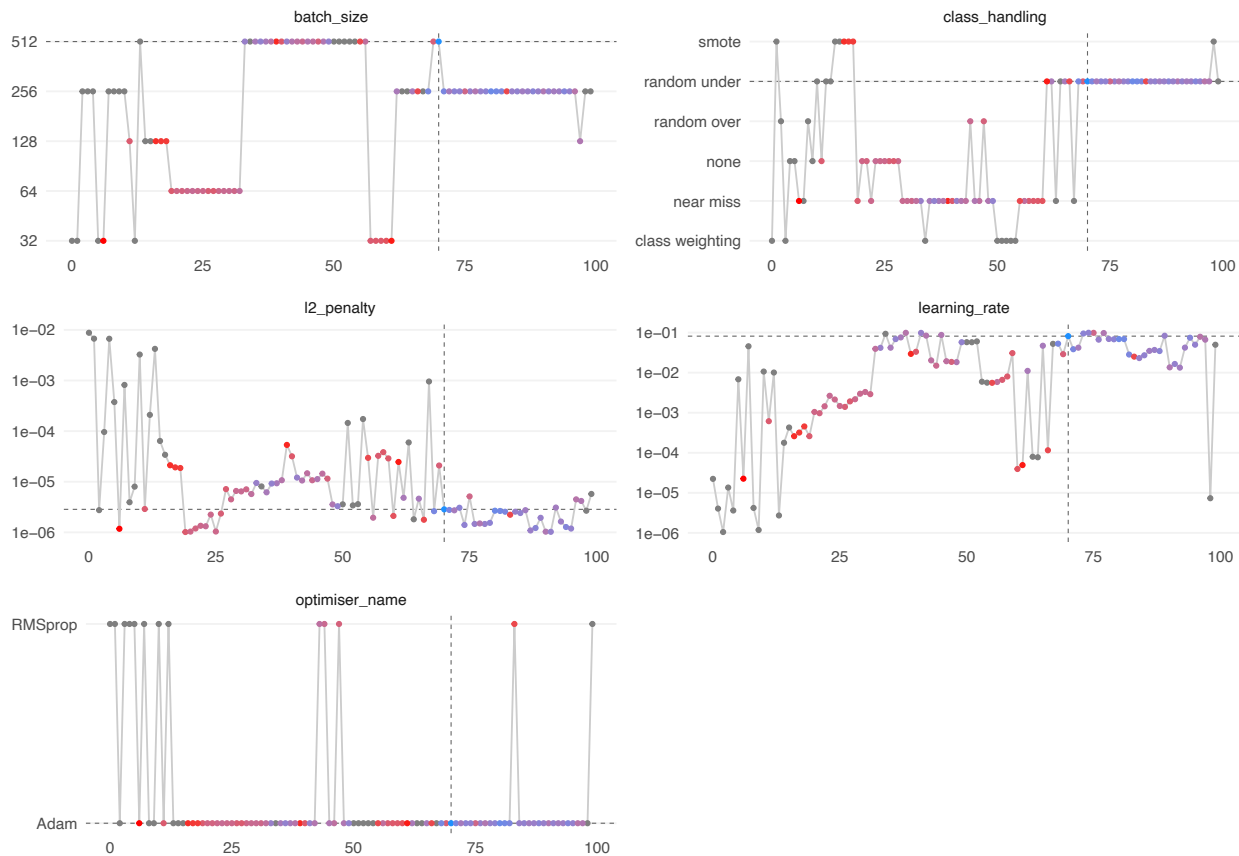

Figure S15: Ref. model, MLP, daily rate  $\geq 1$ .

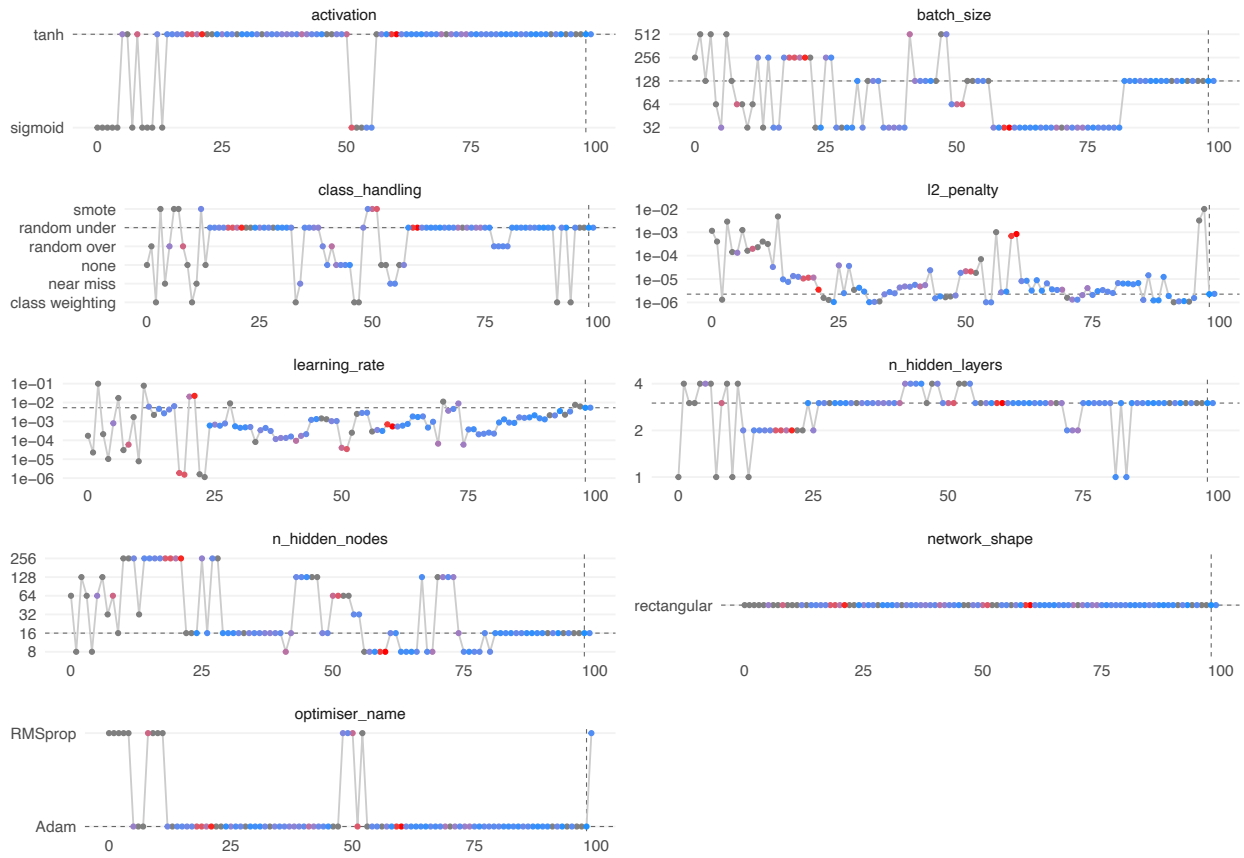

Figure S16: Ref. model, Linear, daily rate  $\geq 1$ .

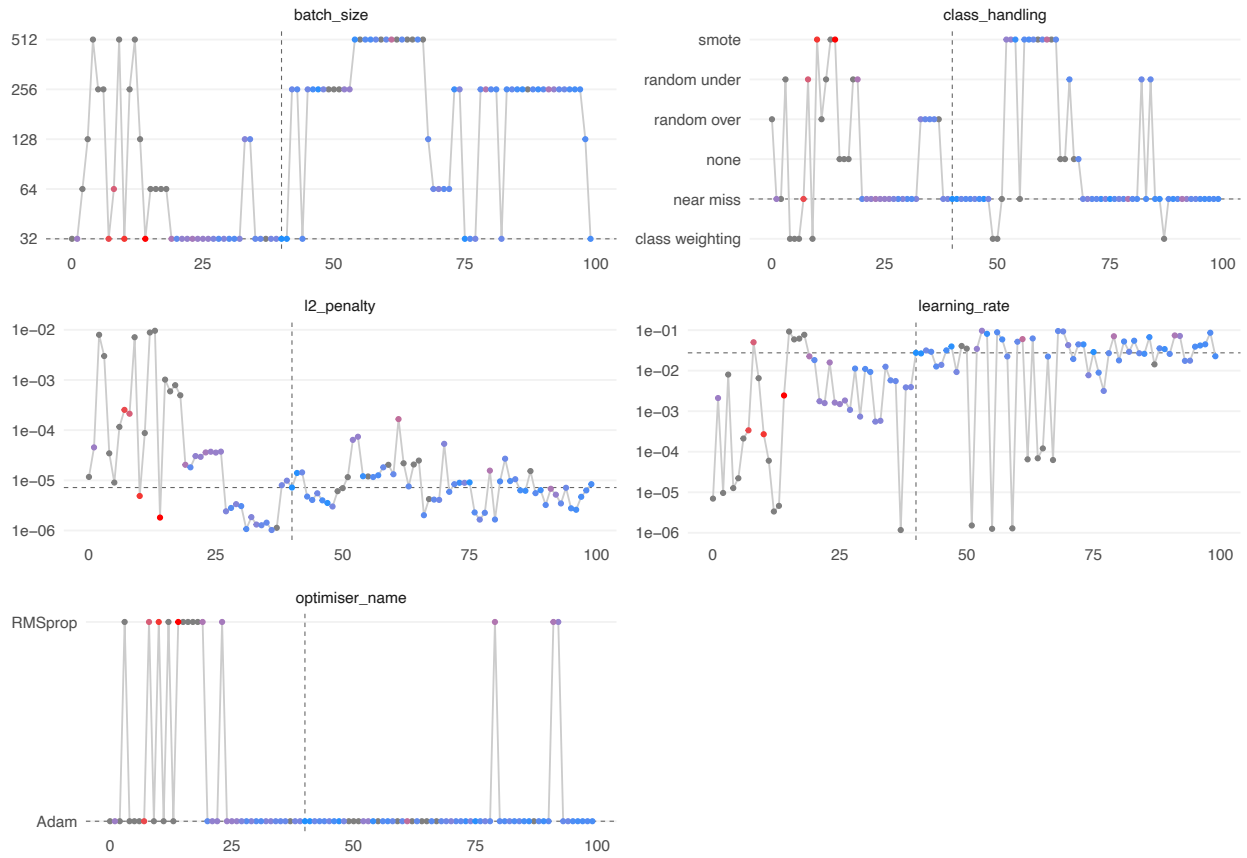

## ROC curves

Receiver-operating characteristic (ROC) curves in the development and test sets.

Figure S17: MLP, daily rate  $> 0$ .

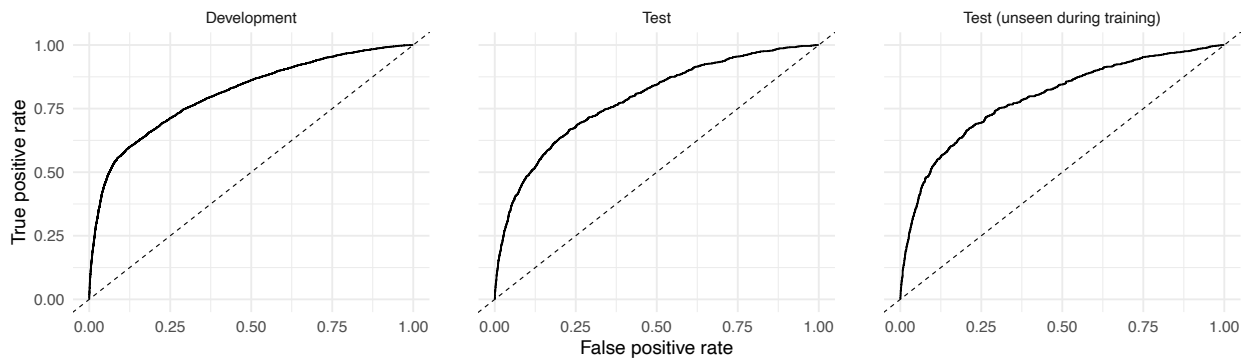

Figure S18: Linear, daily rate  $> 0$ .

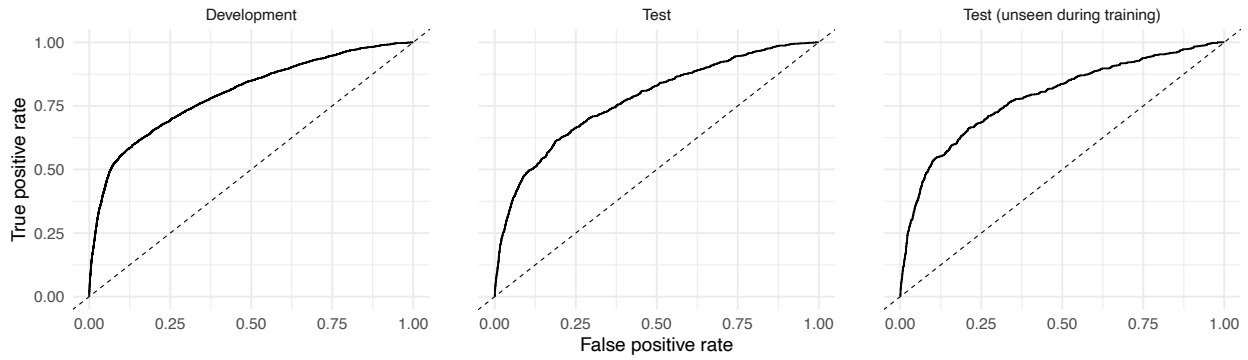

Figure S19: MLP, daily rate  $\geq 1$ .

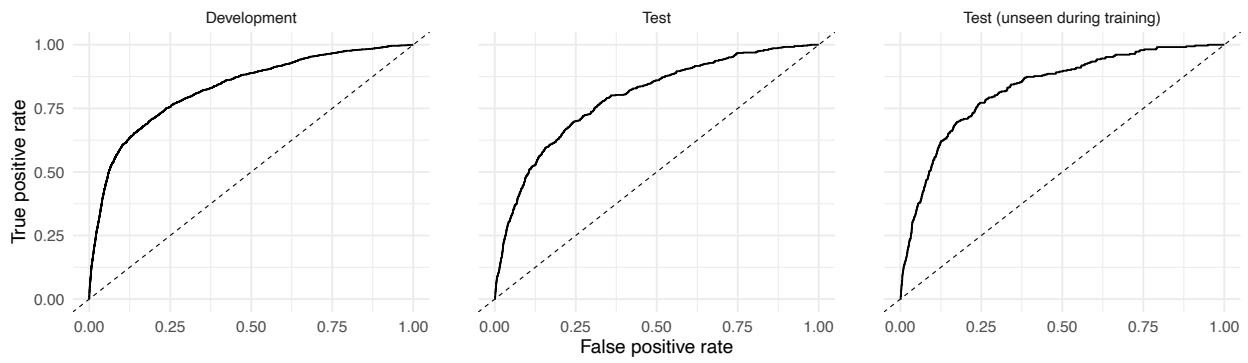

Figure S20: Linear, daily rate  $\geq 1$ .

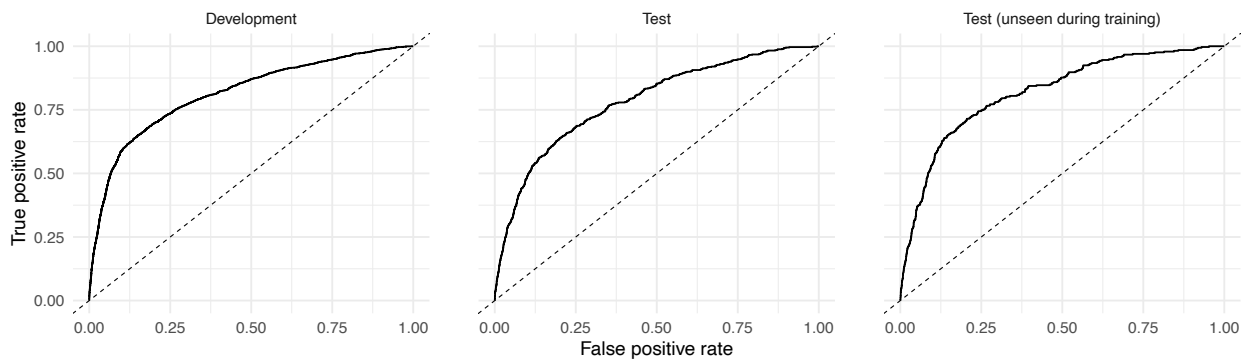

Figure S21: MLP, daily rate  $\geq 2$ .

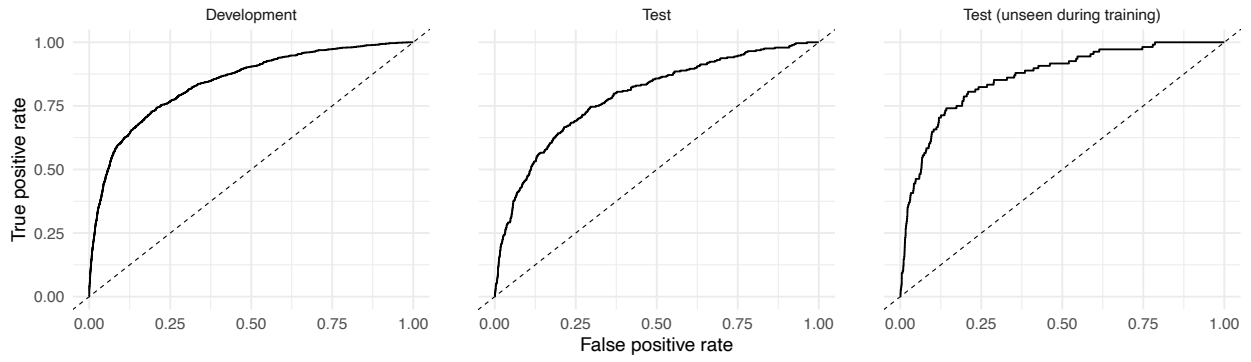

Figure S22: Linear, daily rate  $\geq 2$ .

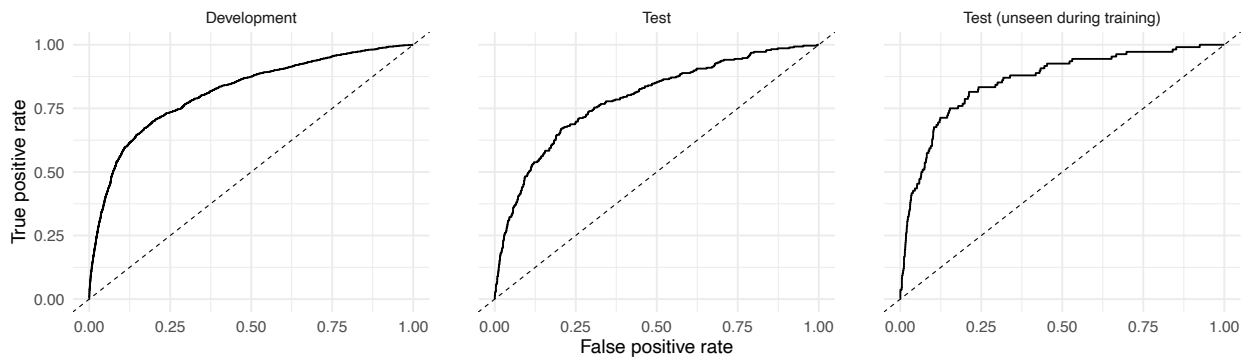

Figure S23: MLP, daily rate  $\geq 3$ .

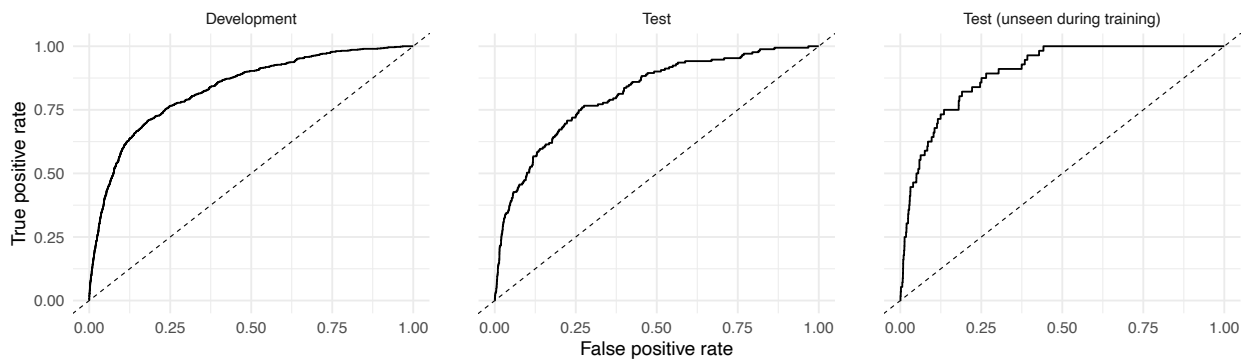

Figure S24: Linear, daily rate  $\geq 3$ .

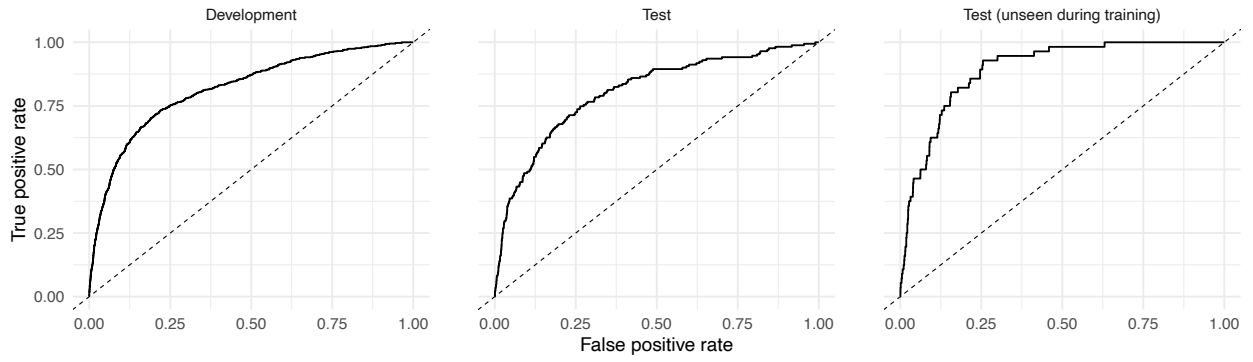

Figure S25: MLP, daily rate  $\geq 5$ .

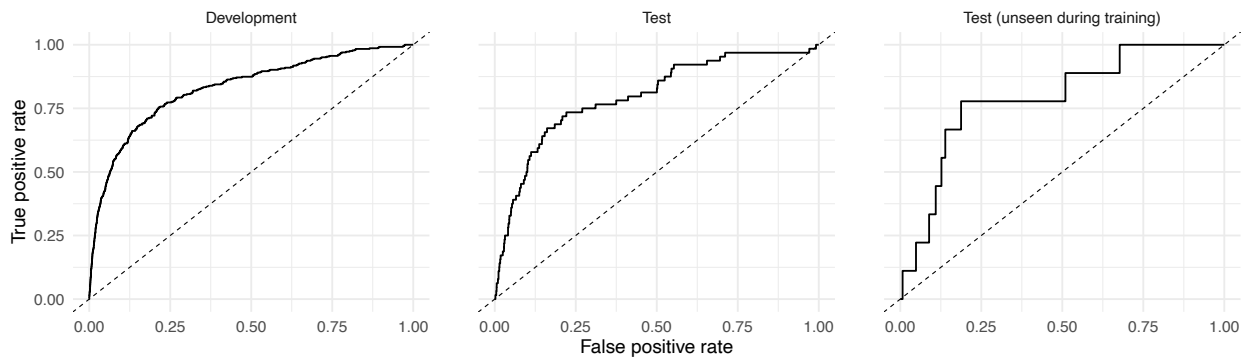

Figure S26: Linear, daily rate  $\geq 5$ .

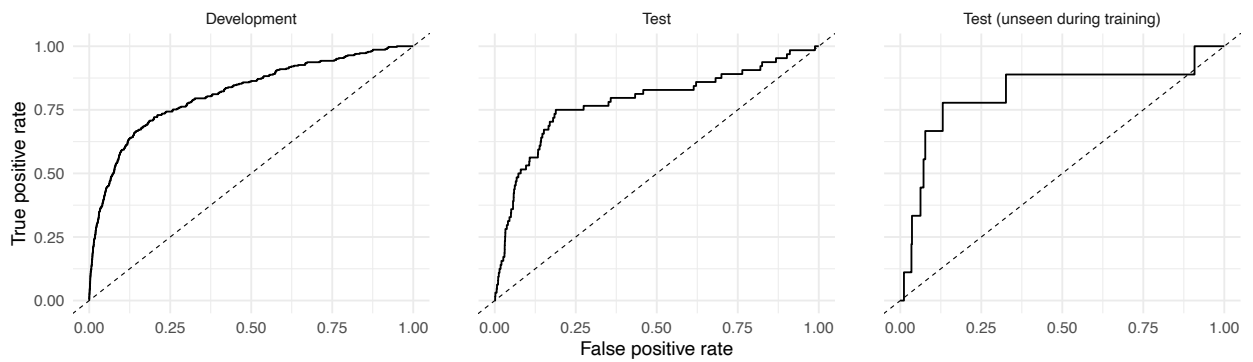



Figure S27: Ref. model, MLP, daily rate  $> 0$ .

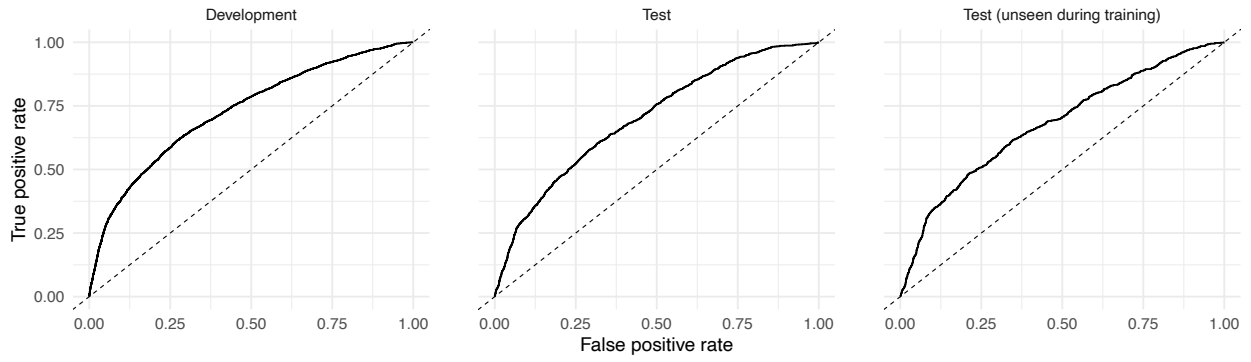

Figure S28: Ref. model, Linear, daily rate  $> 0$ .

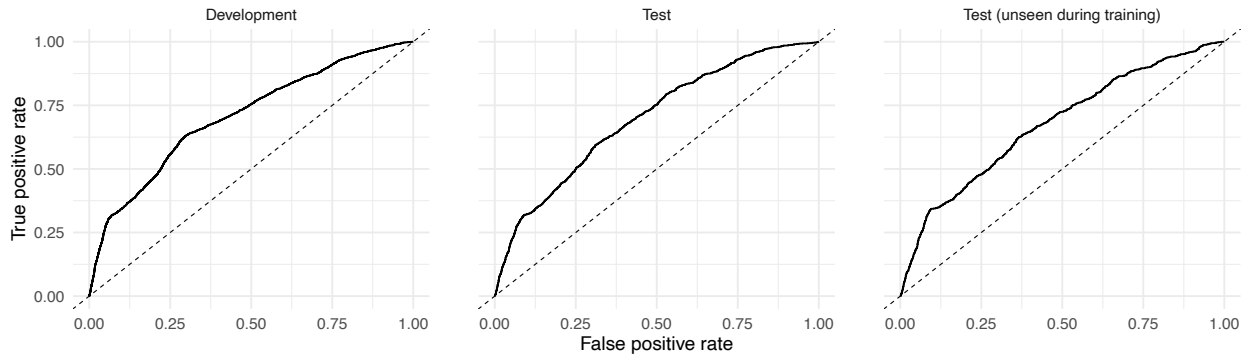

Figure S29: Ref. model, MLP, daily rate  $\geq 1$ .

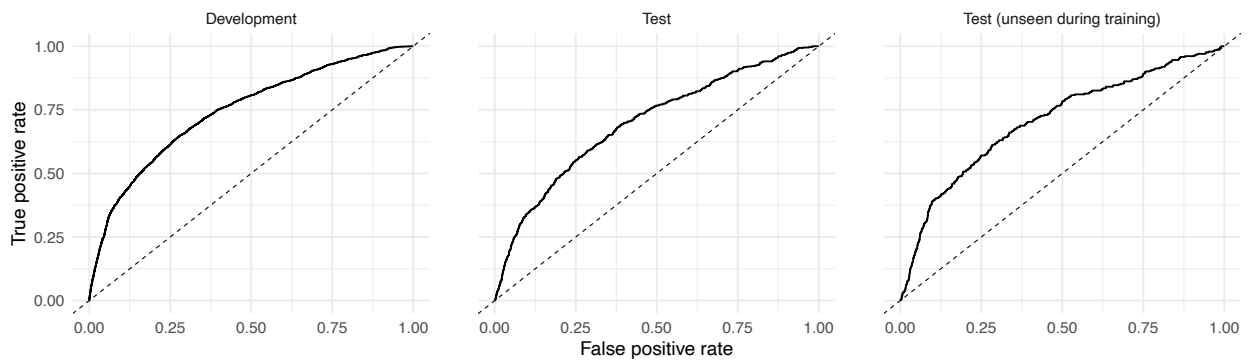

Figure S30: Ref. model, Linear, daily rate  $\geq 1$ .

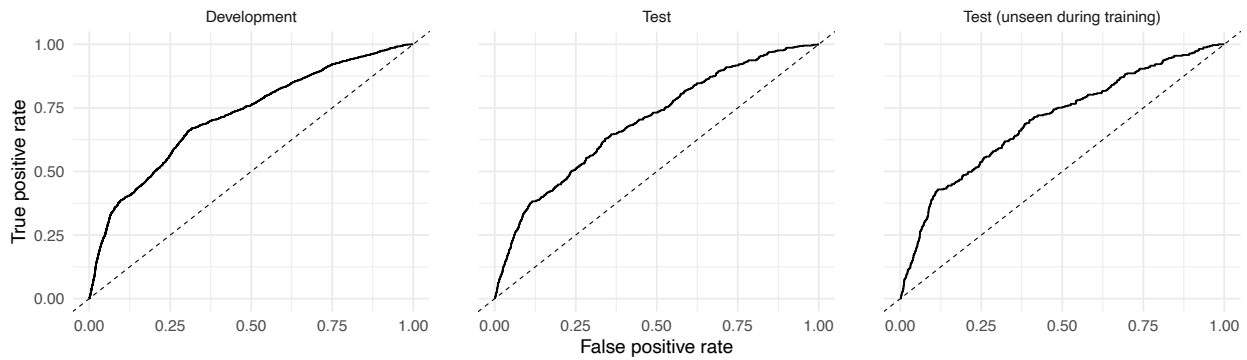

## Calibration plots

Calibration curves in the development and test sets.

Figure S31: MLP, daily rate  $> 0$ .

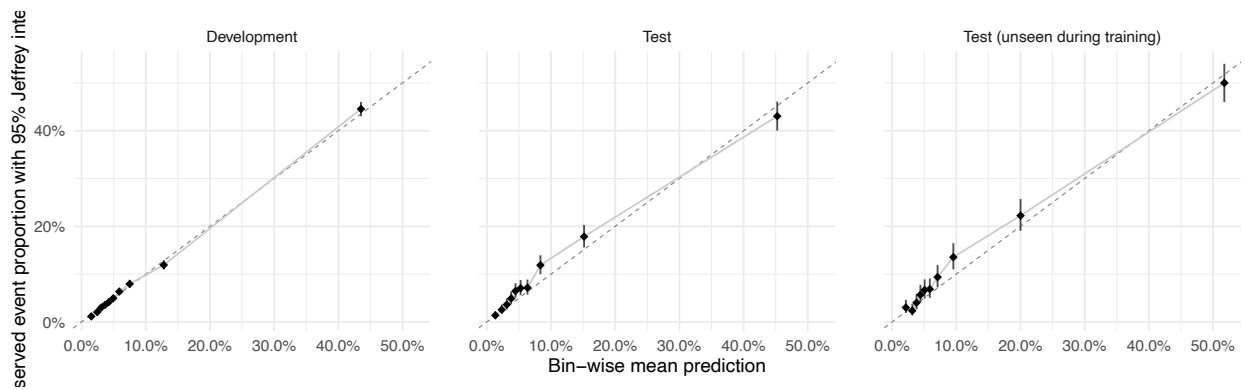

Figure S32: Linear, daily rate  $> 0$ .

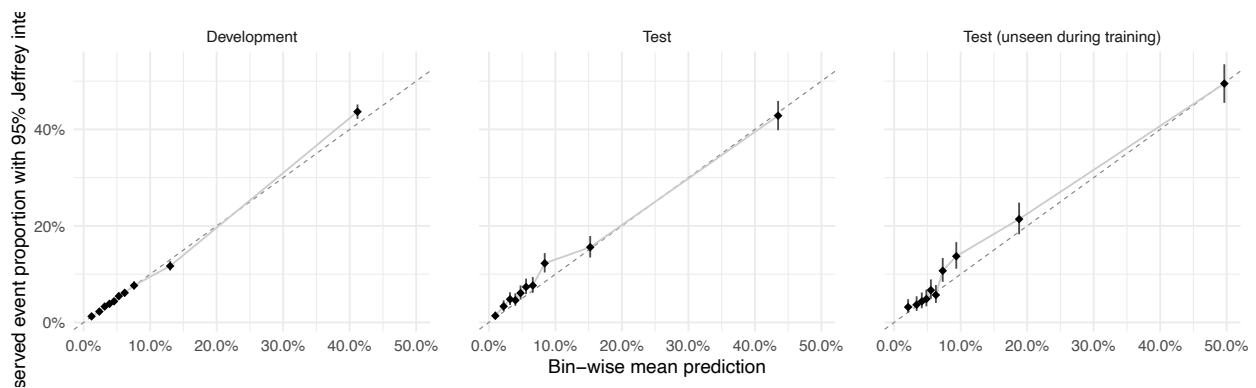

Figure S33: MLP, daily rate  $\geq 1$ .

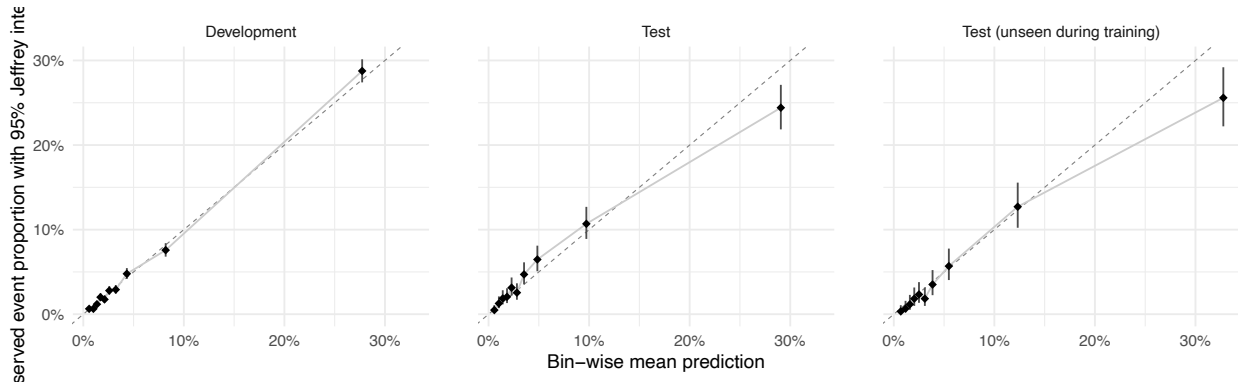

Figure S34: Linear, daily rate  $\geq 1$ .

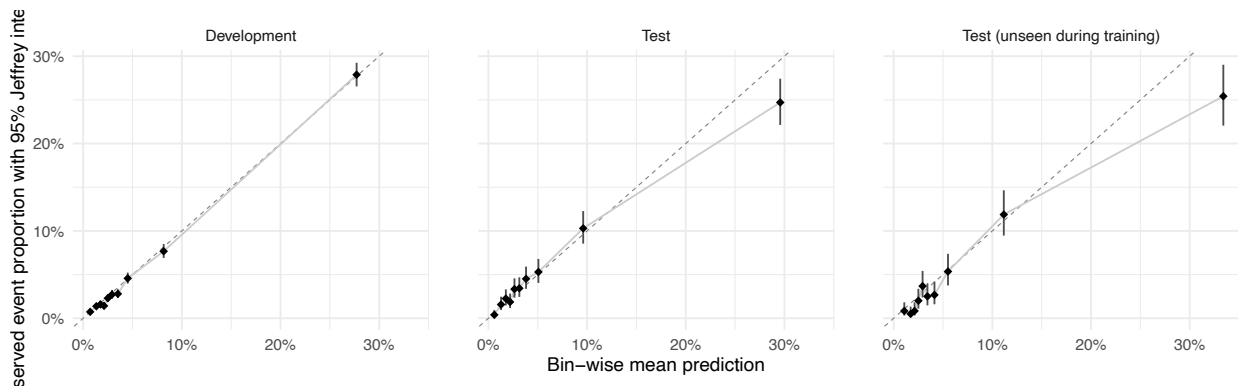

Figure S35: MLP, daily rate  $\geq 2$ .

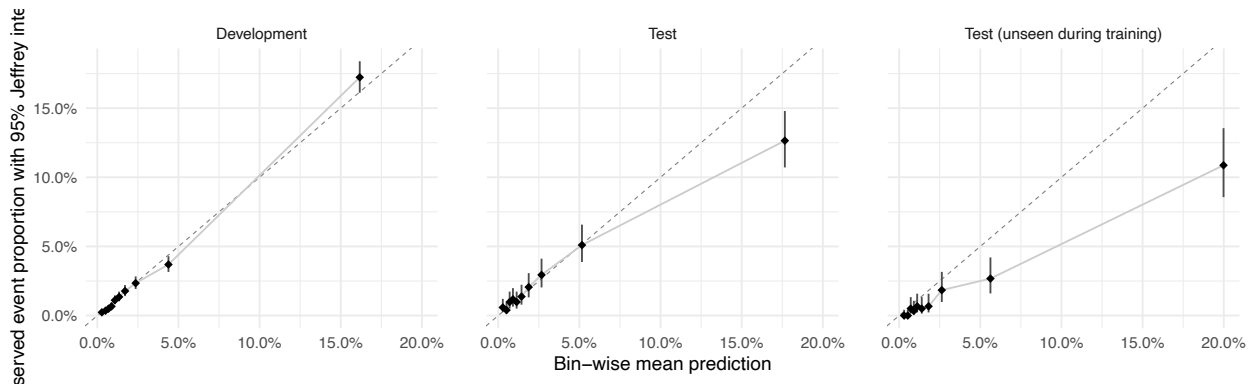

Figure S36: Linear, daily rate  $\geq 2$ .

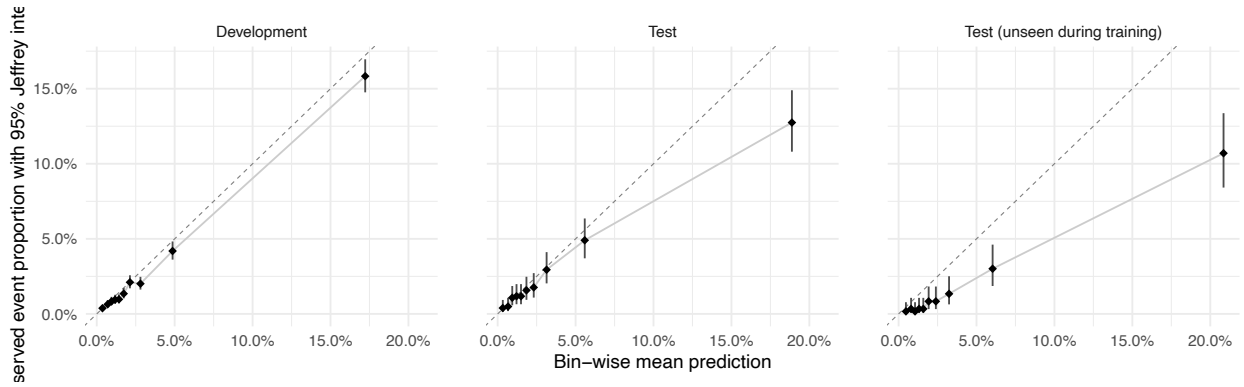

Figure S37: MLP, daily rate  $\geq 3$ .

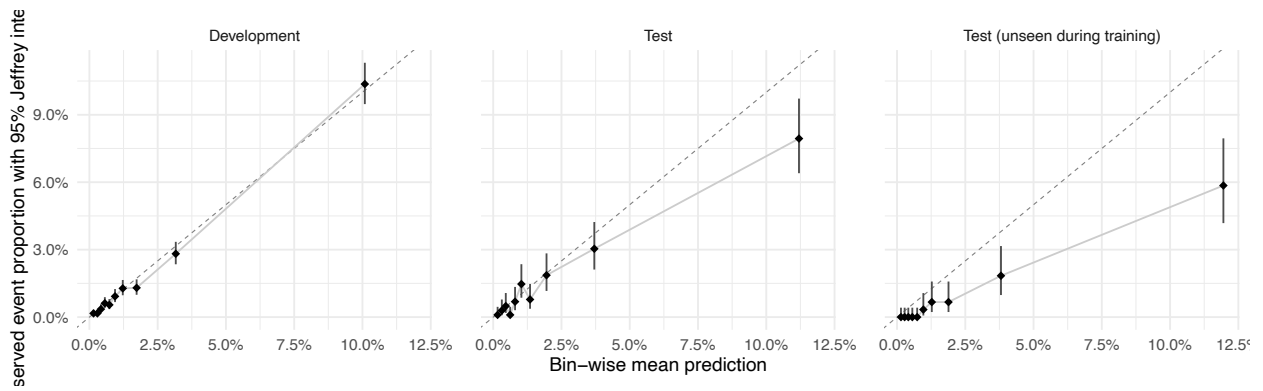

Figure S38: Linear, daily rate  $\geq 3$ .

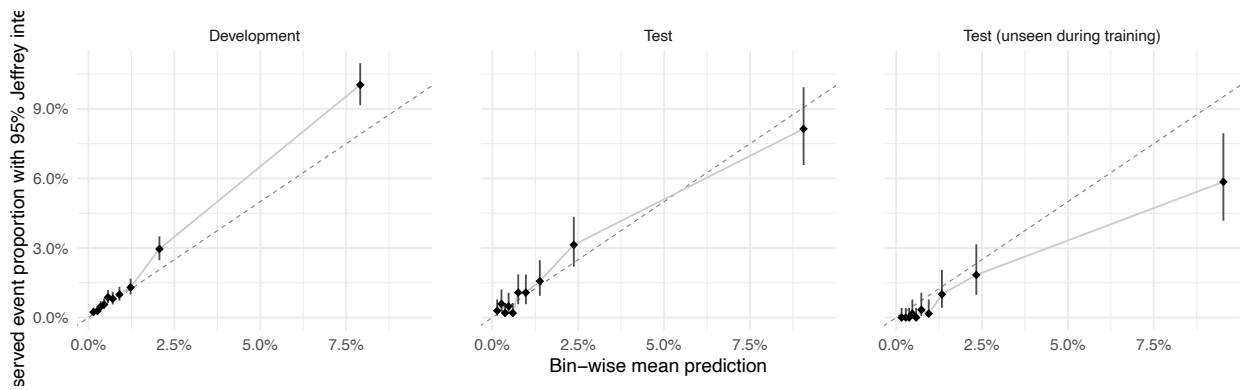

Figure S39: MLP, daily rate  $\geq 5$ .

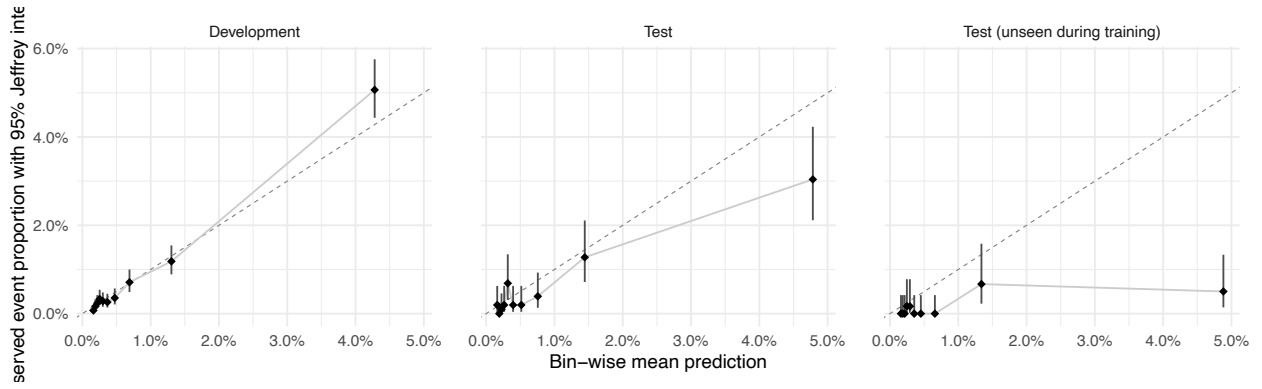

Figure S40: Linear, daily rate  $\geq 5$ .

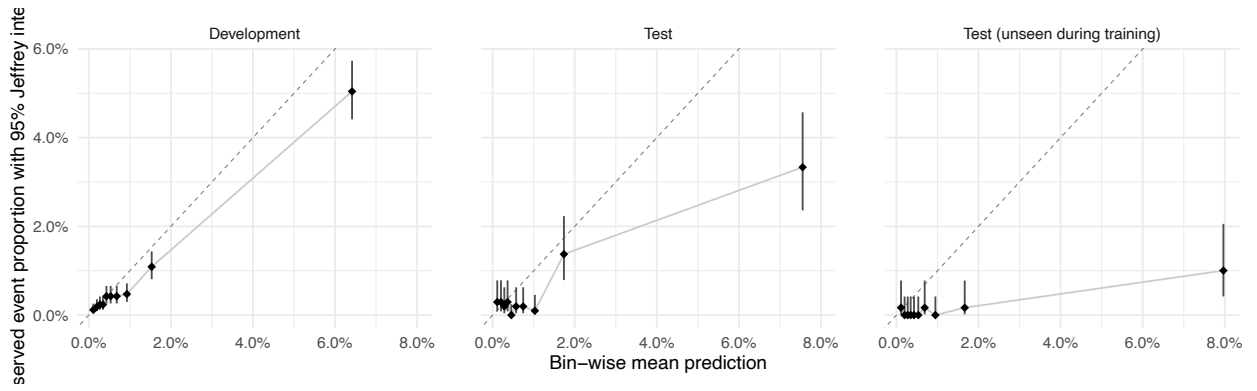

Figure S41: Ref. model, MLP, daily rate  $> 0$ .

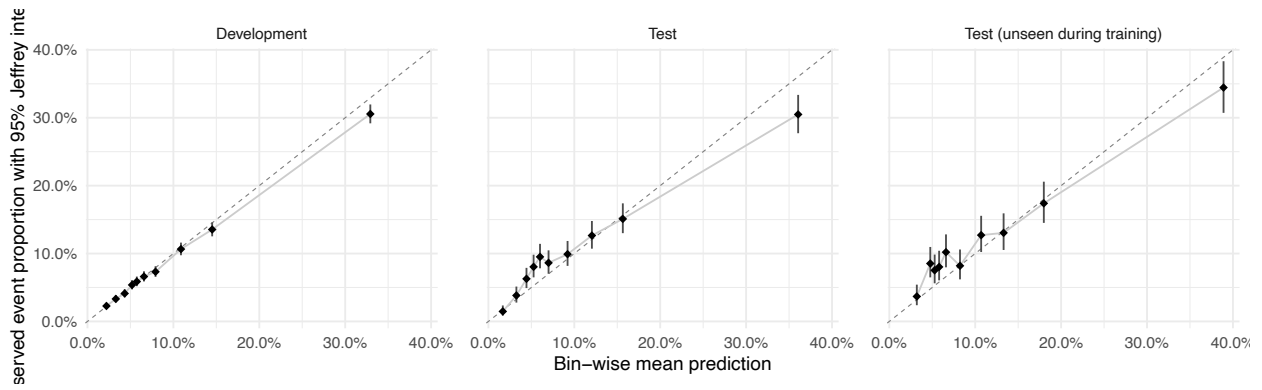

Figure S42: Ref. model, Linear, daily rate  $> 0$ .

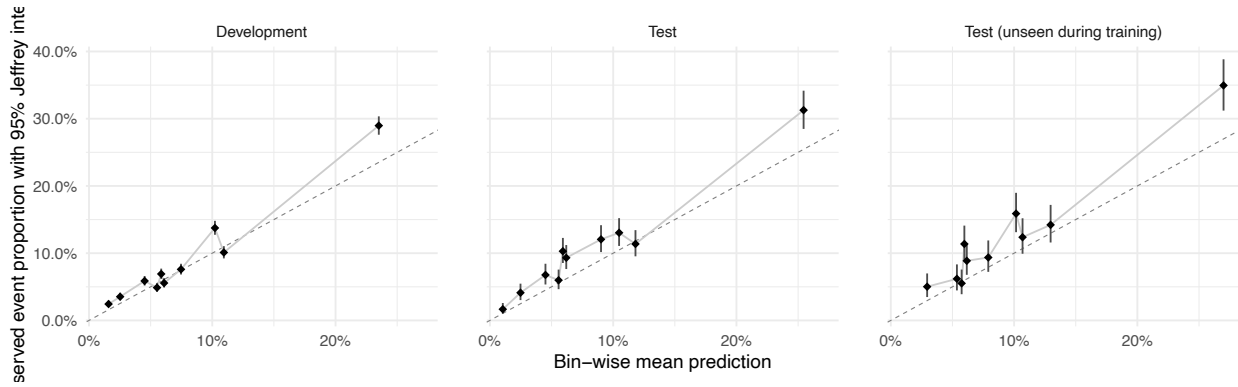

Figure S43: Ref. model, MLP, daily rate  $\geq 1$ .

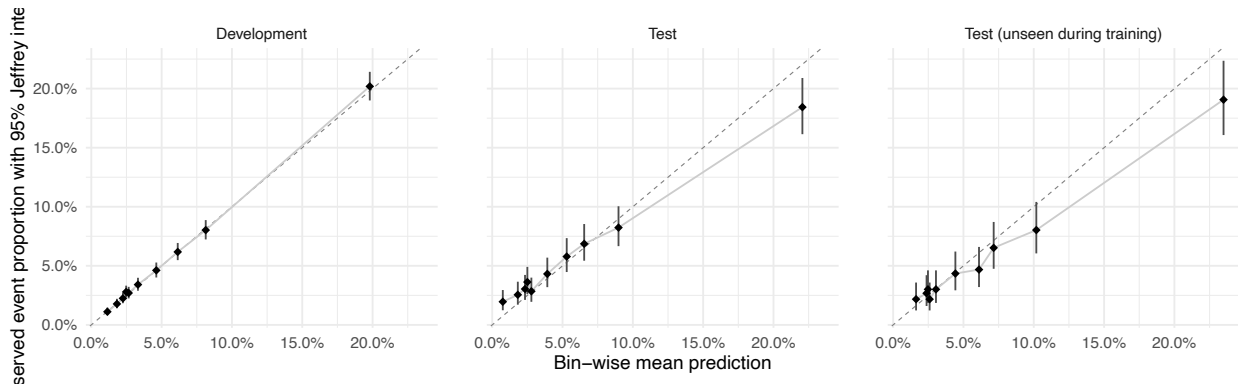

Figure S44: Ref. model, Linear, daily rate  $\geq 1$ .

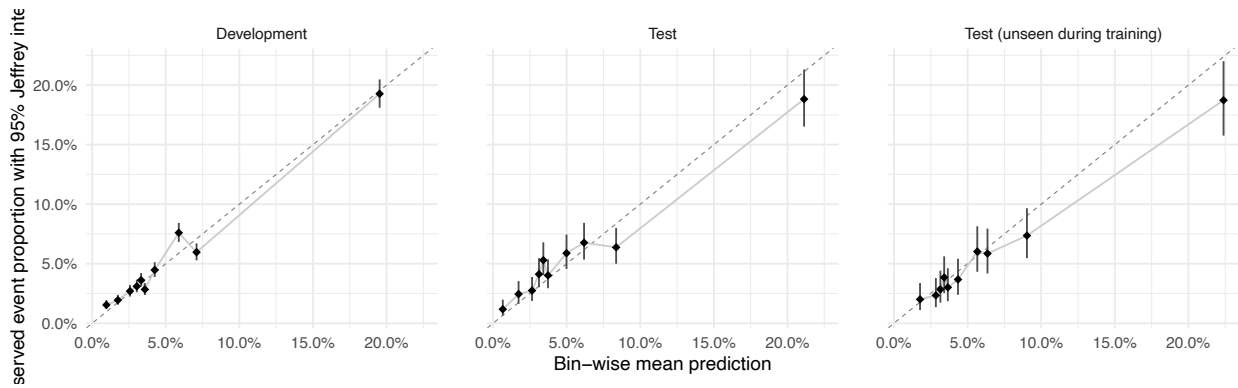

## Decision curves

Decision curves based on the test set. The curves show the clinical utility (in the unit of standardised net benefit) of intervening in all patients (magenta), no patients (dark grey, follows the x axis) and patients identified by the model (blue).

Figure S45: MLP, daily rate  $> 0$ .

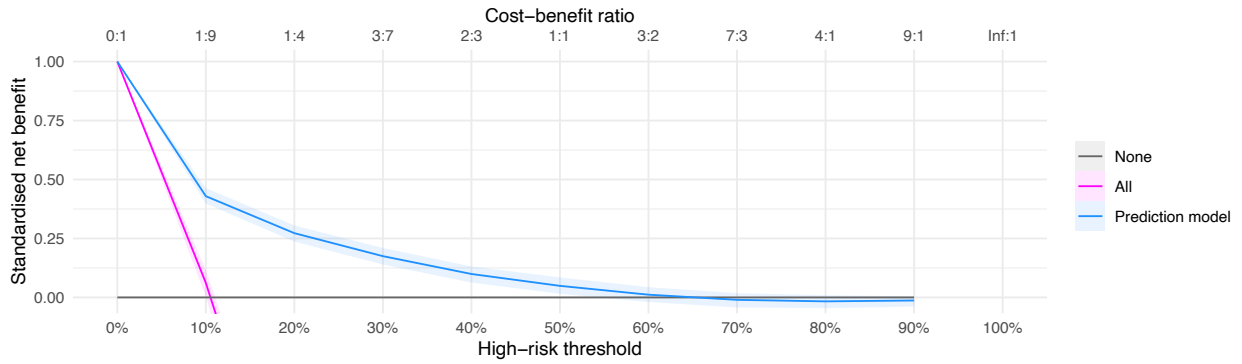

Figure S46: Linear, daily rate  $> 0$ .

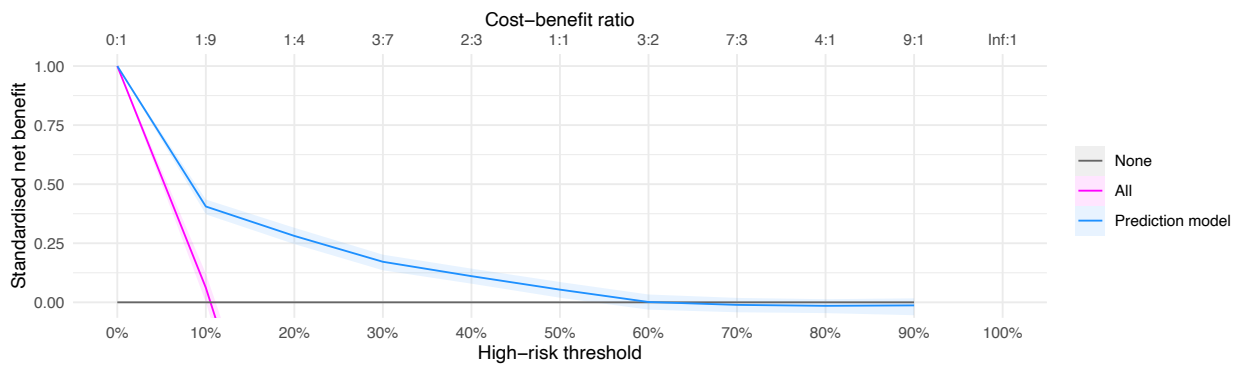

Figure S47: MLP, daily rate  $\geq 1$ .

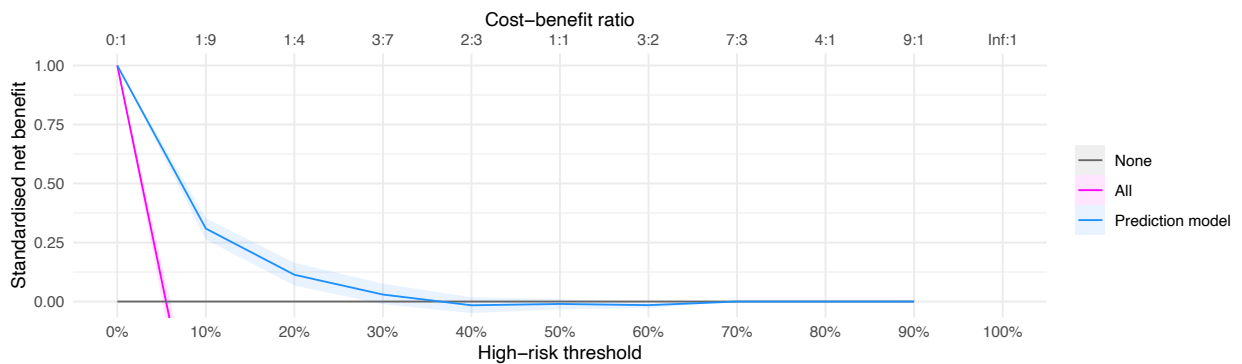

Figure S48: Linear, daily rate  $\geq 1$ .

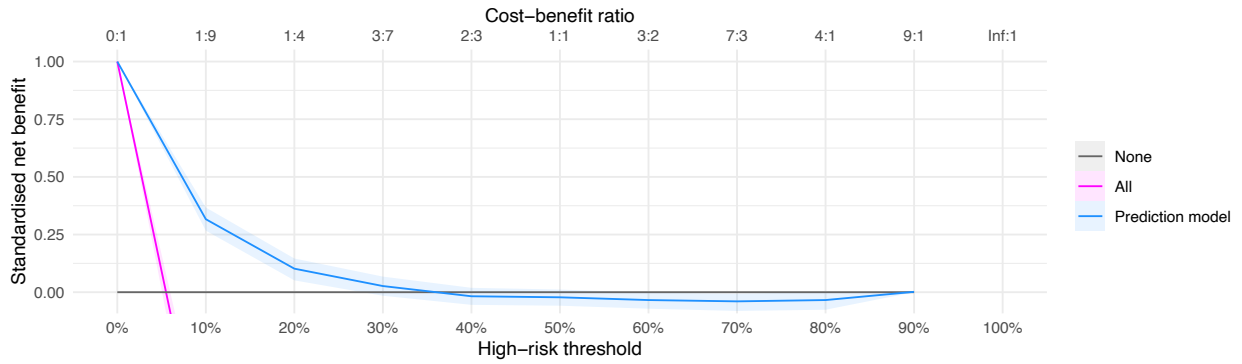

Figure S49: MLP, daily rate  $\geq 2$ .

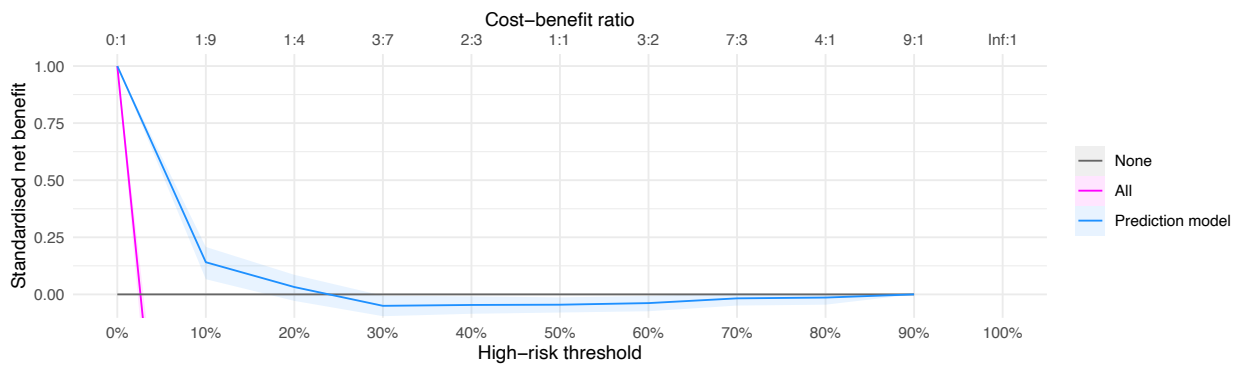

Figure S50: Linear, daily rate  $\geq 2$ .

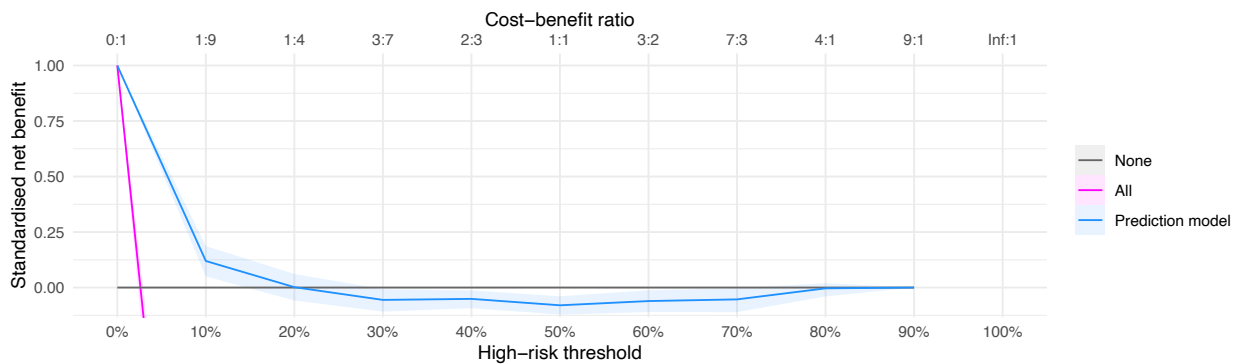



Figure S51: MLP, daily rate  $\geq 3$ .

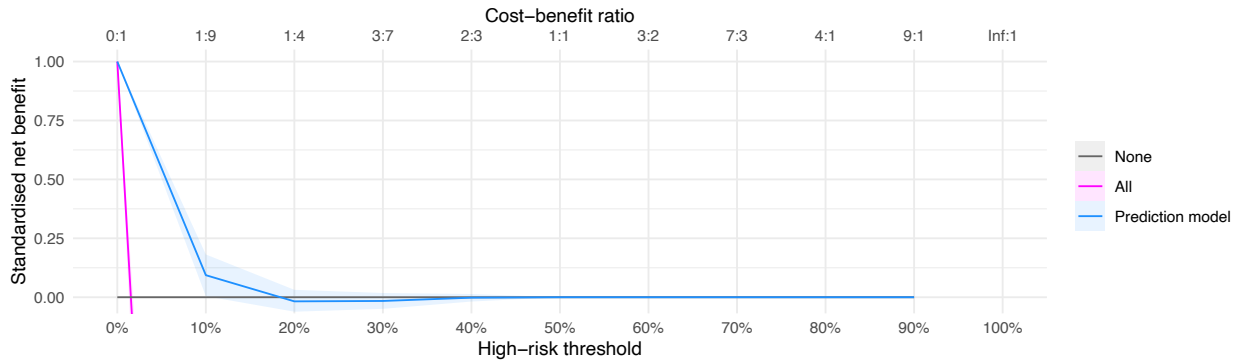

Figure S52: Linear, daily rate  $\geq 3$ .

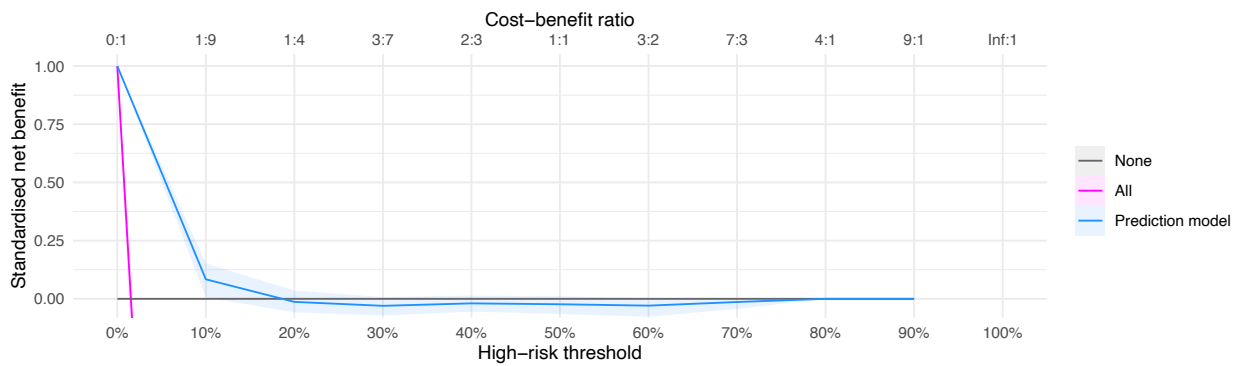

Figure S53: MLP, daily rate  $\geq 5$ .

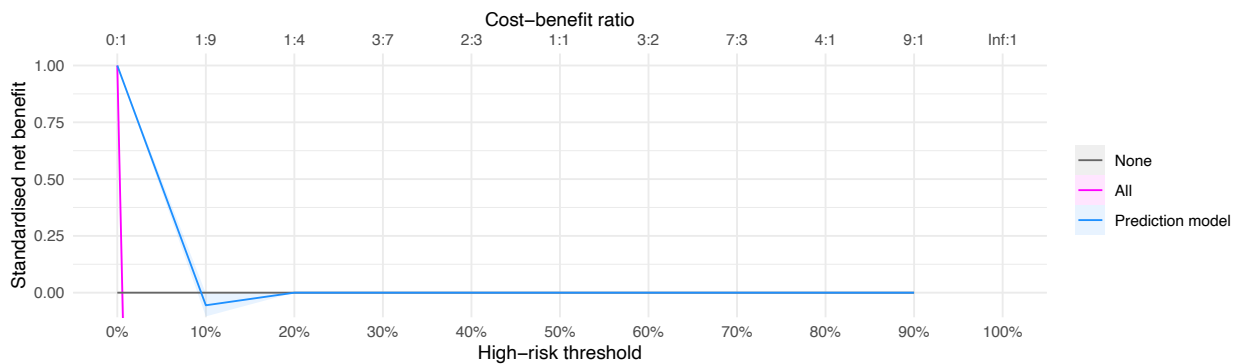

Figure S54: Linear, daily rate  $\geq 5$ .

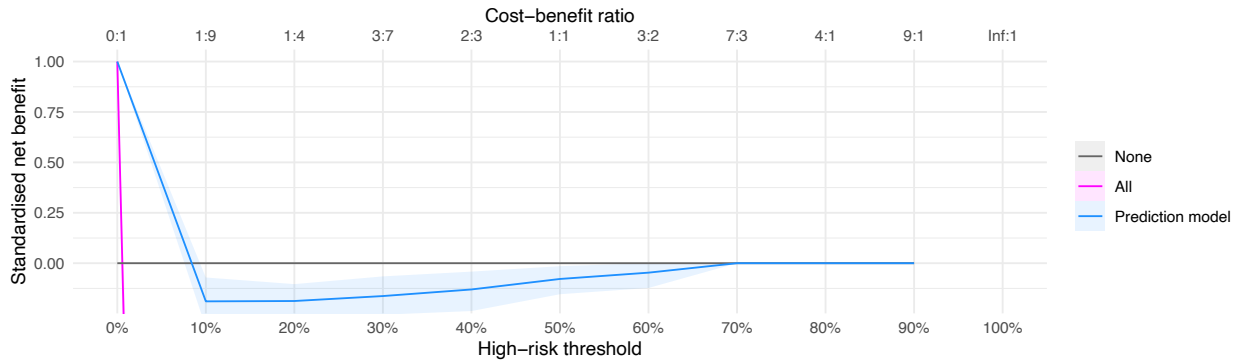

Figure S55: Ref. model, MLP, daily rate  $> 0$ .

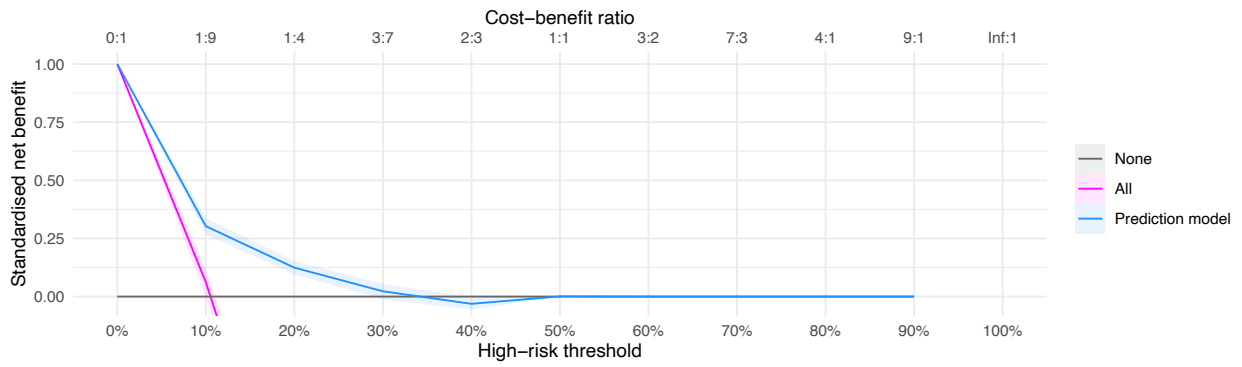

Figure S56: Ref. model, Linear, daily rate  $> 0$ .

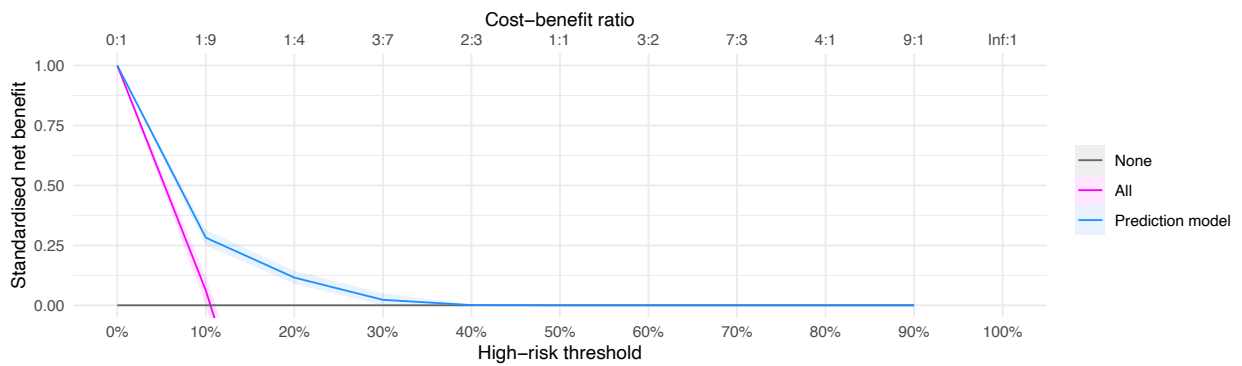

Figure S57: Ref. model, MLP, daily rate  $\geq 1$ .

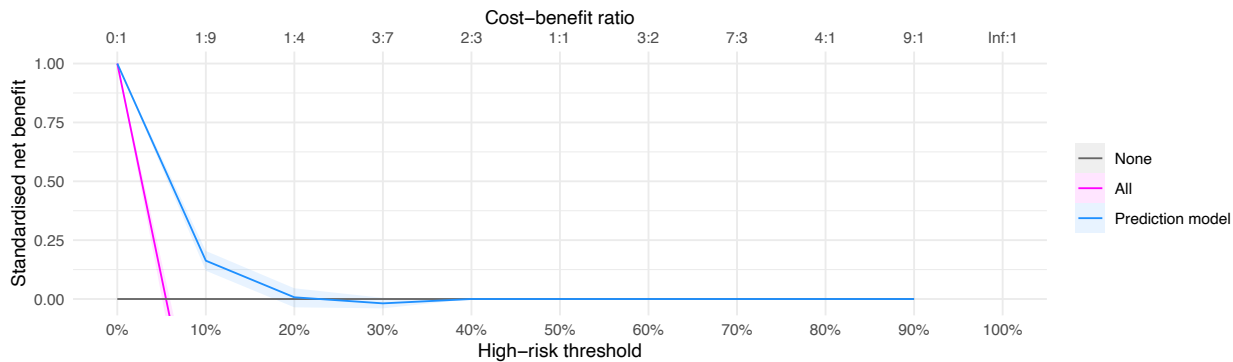

Figure S58: Ref. model, Linear, daily rate  $\geq 1$ .

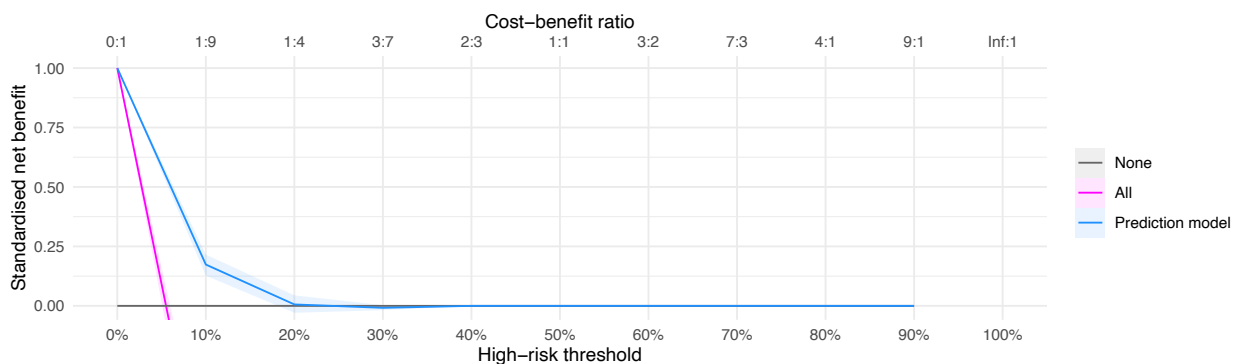

## SHAP plots

The individual shap plots below all visualise the the distributions as density bands of shap values by feature. Blue represents low feature values (0 for binary features) and red high feature values (1 for binary features). Continuous features were binned into deciles.

Figure S59: MLP, daily rate > 0

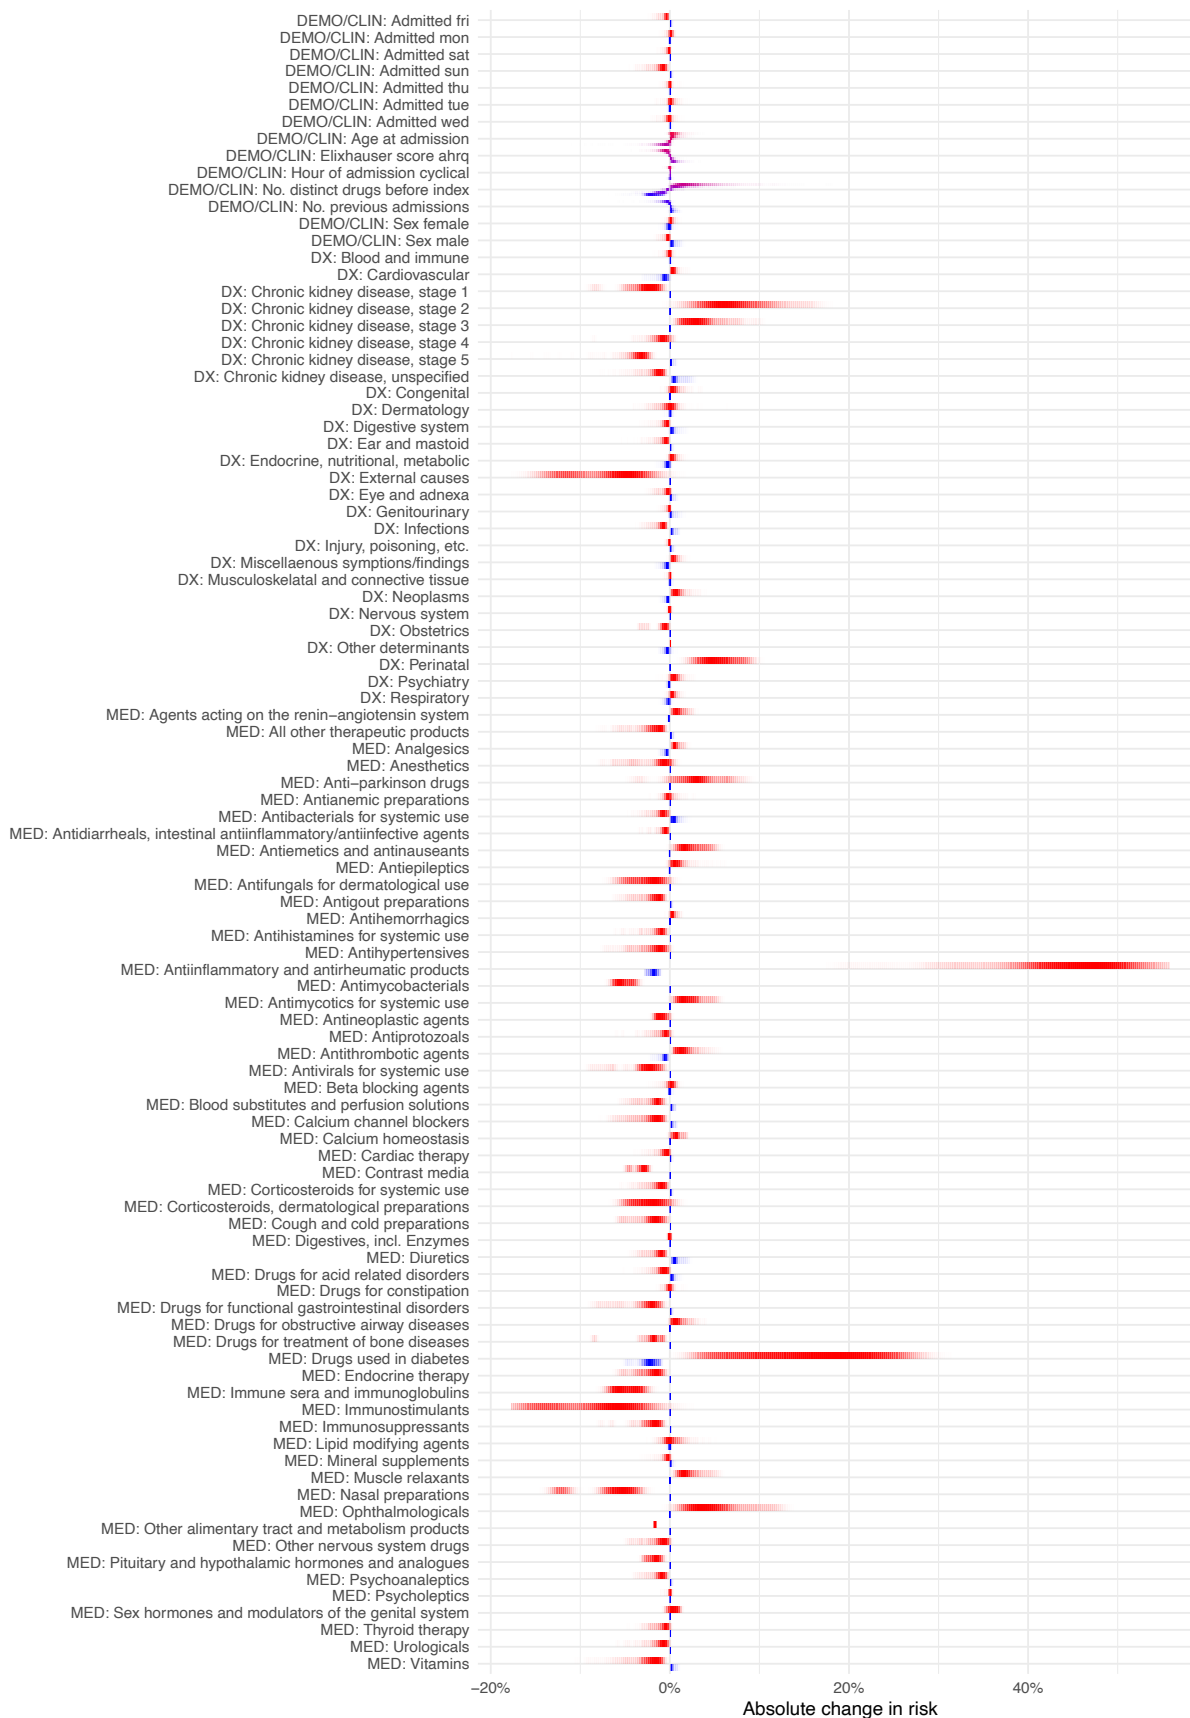



Figure S60: Linear, daily rate > 0

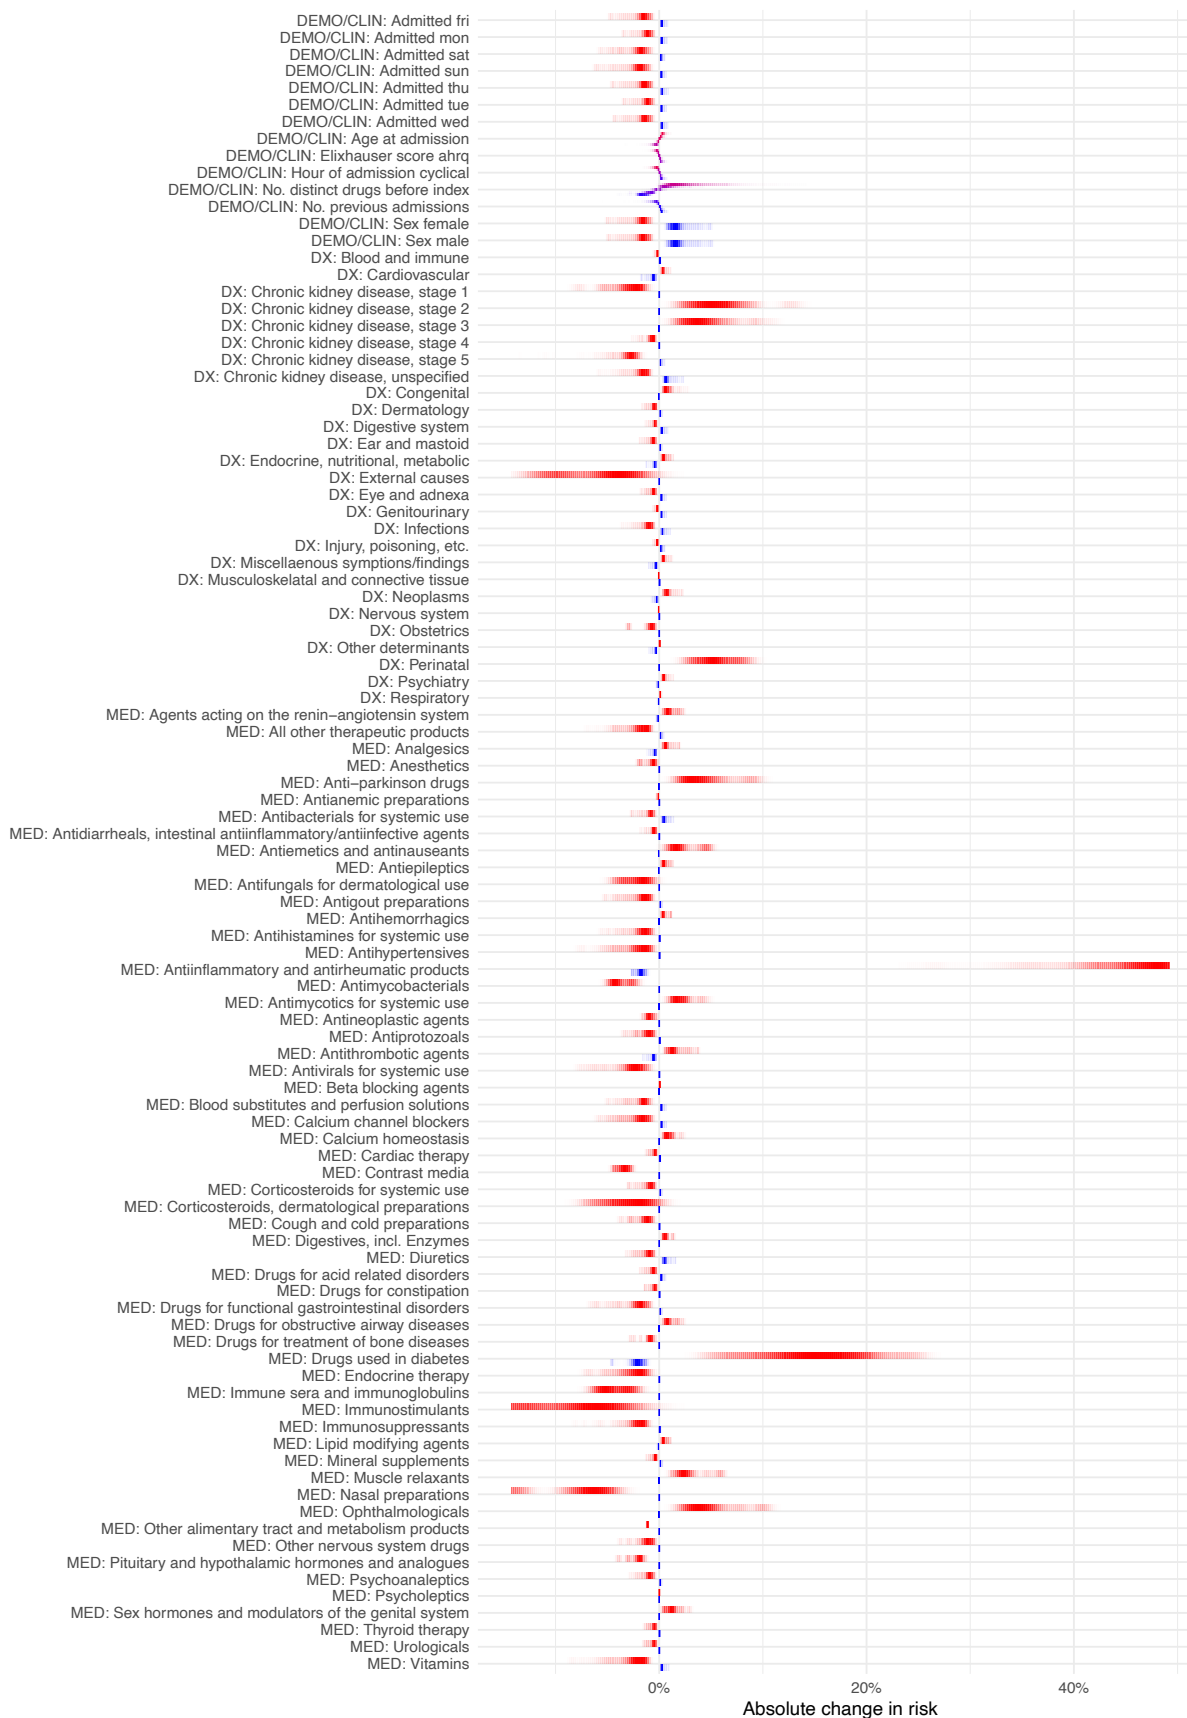



Figure S61: MLP, daily rate  $\geq 1$

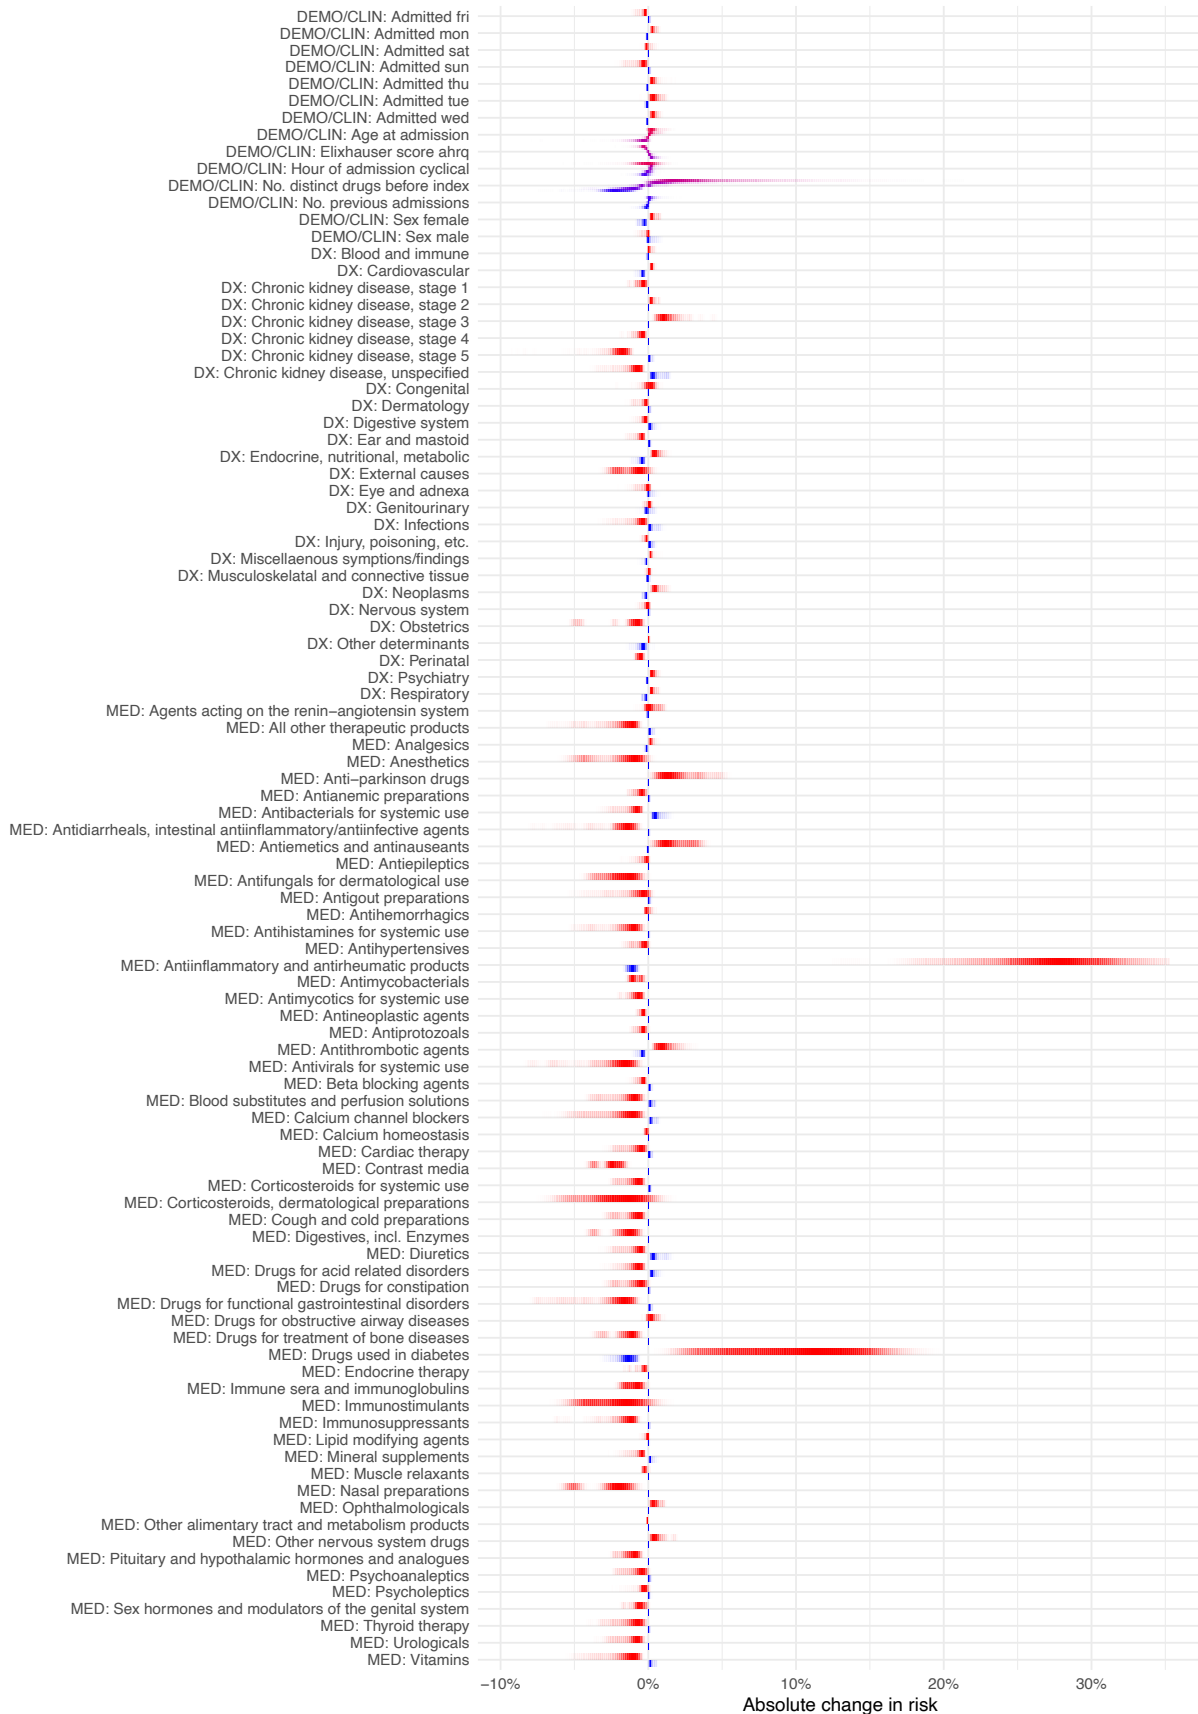





Figure S62: Linear, daily rate  $\geq 1$

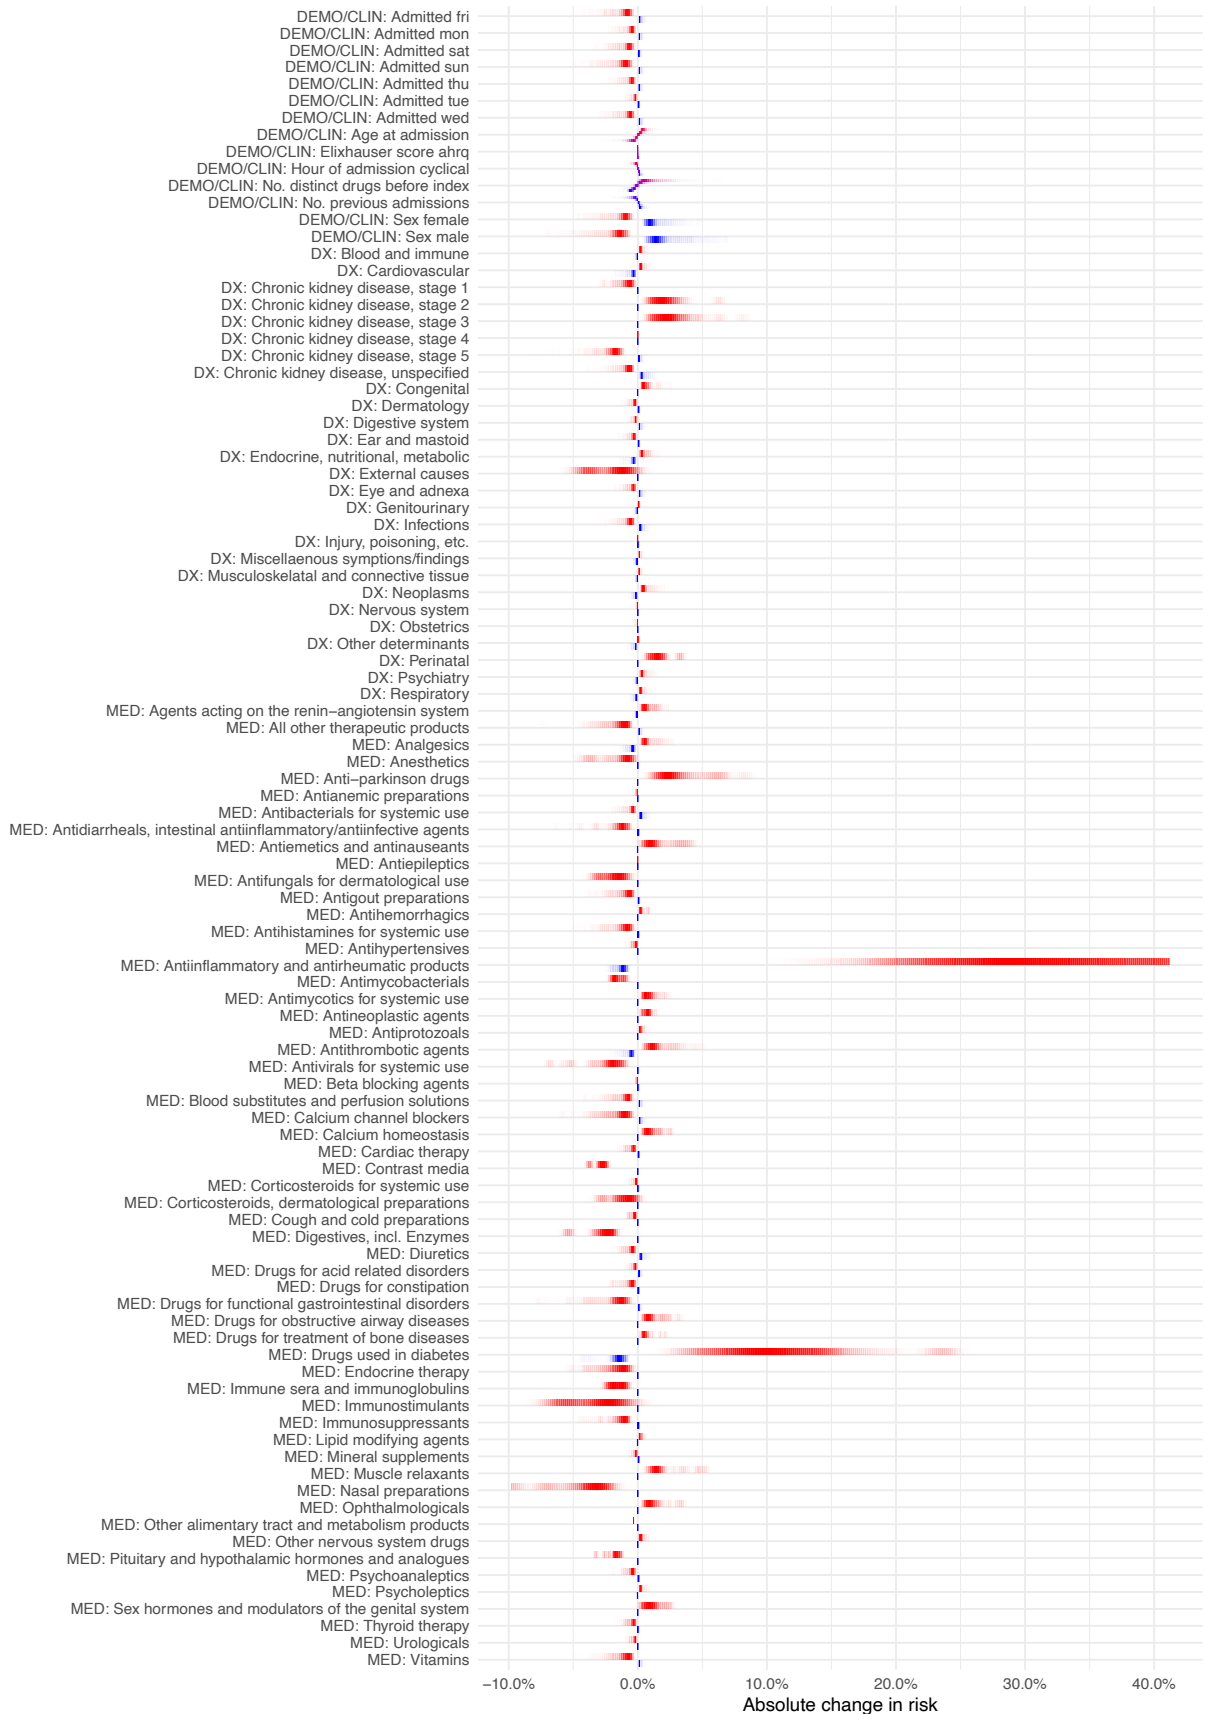



Figure S63: MLP, daily rate  $\geq 2$

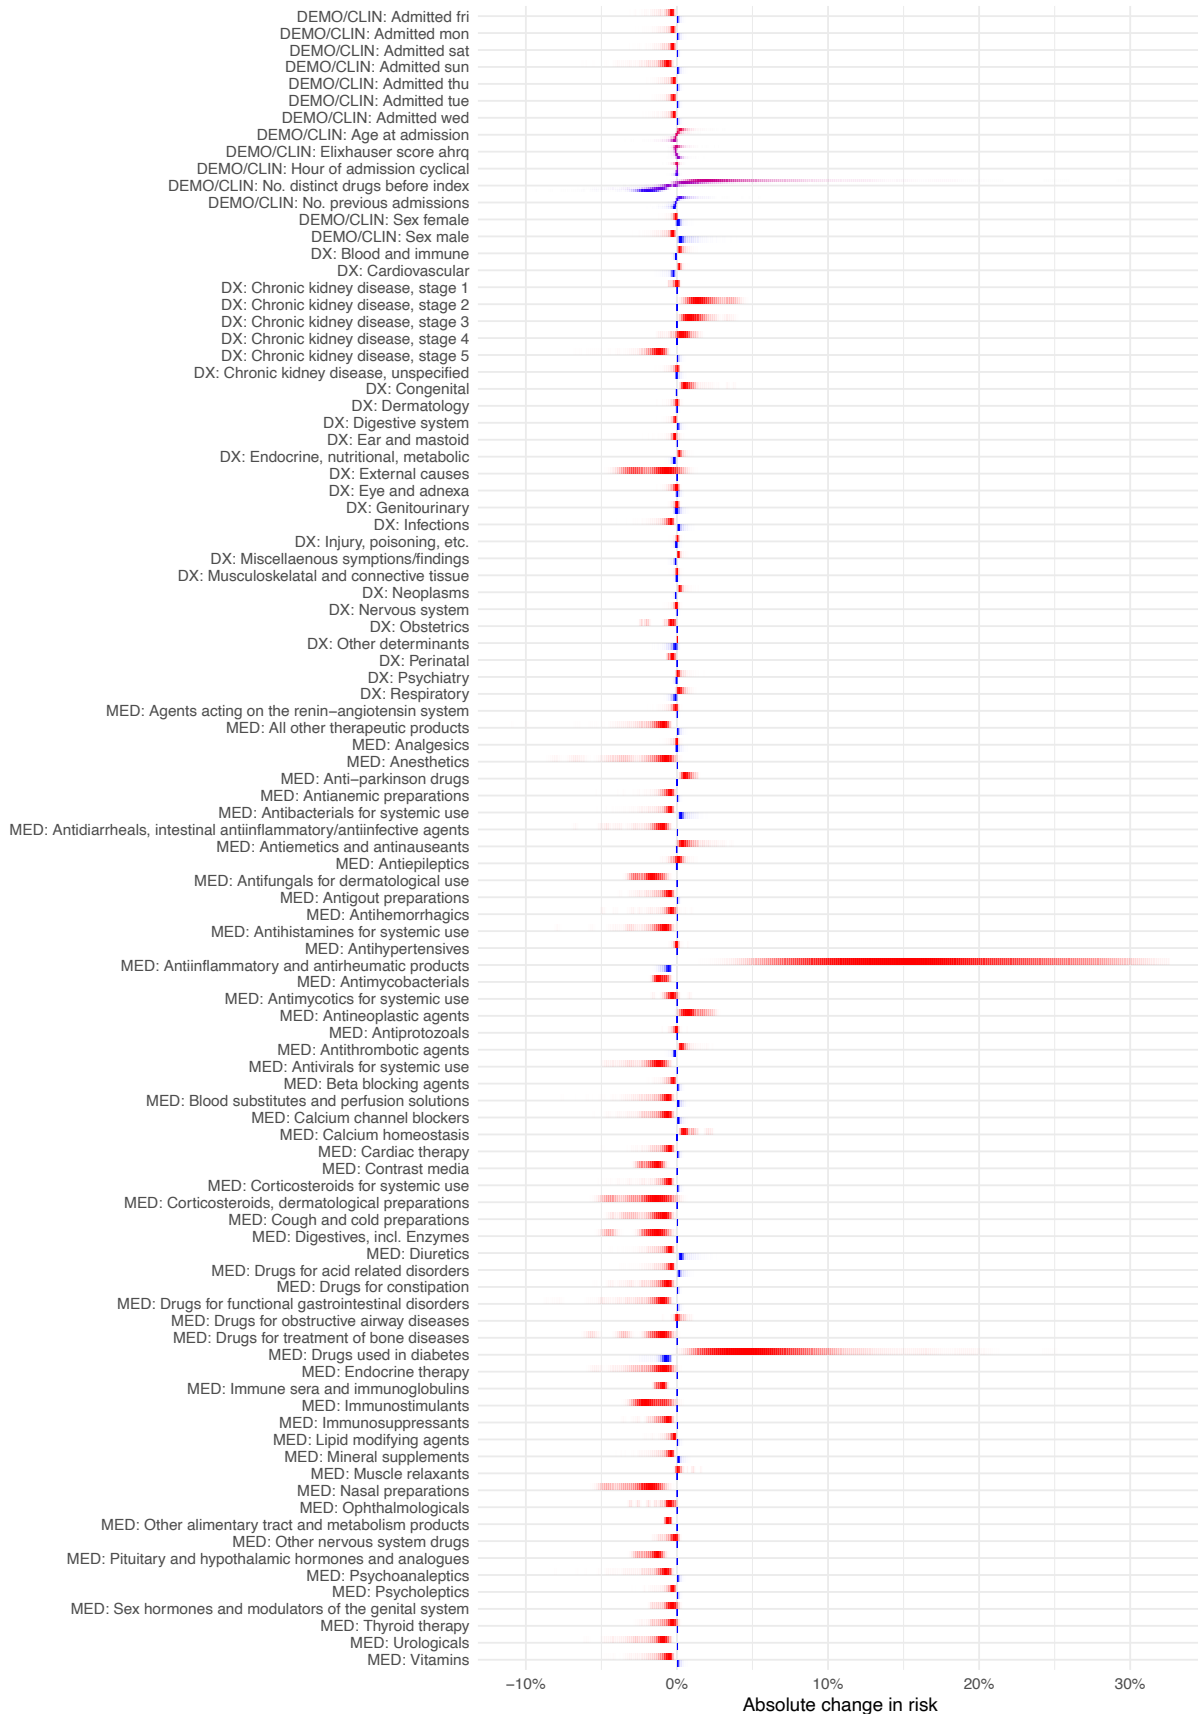



Figure S64: Linear, daily rate  $\geq 2$

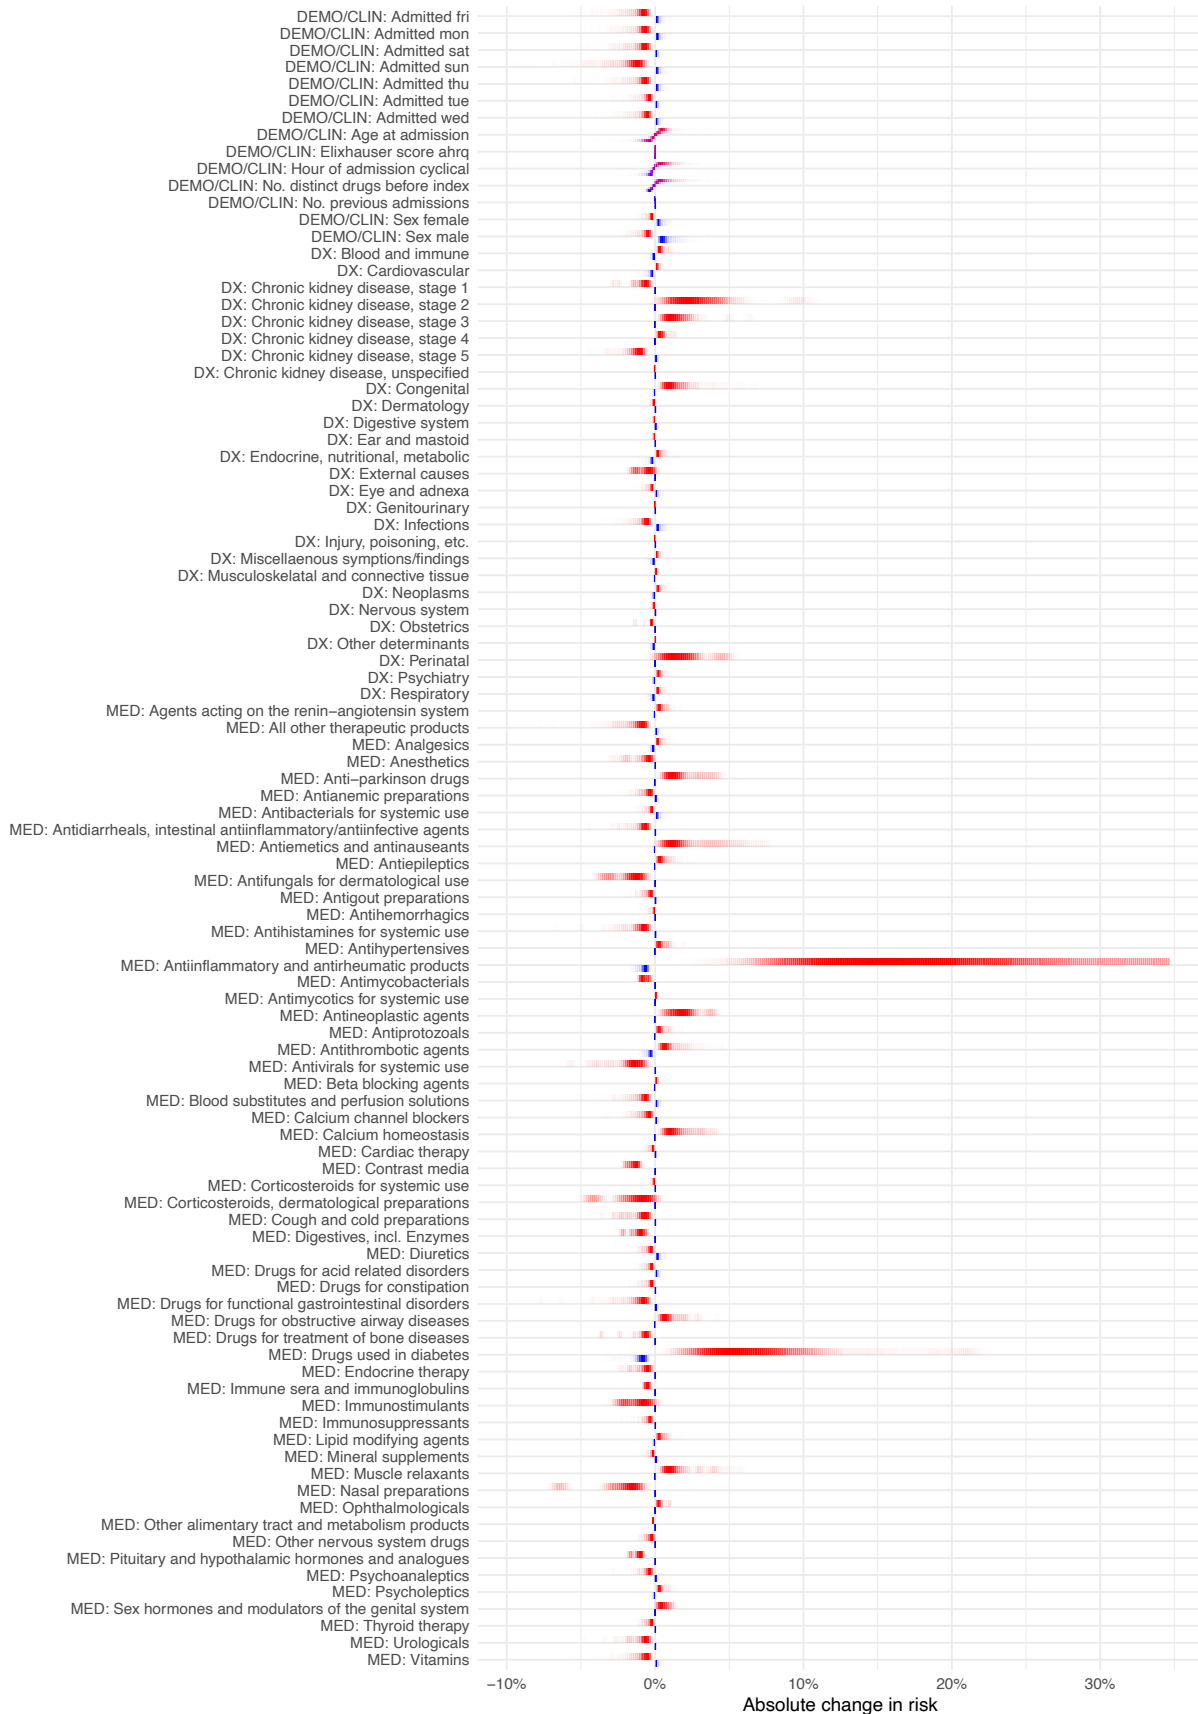



Figure S65: MLP, daily rate  $\geq 3$

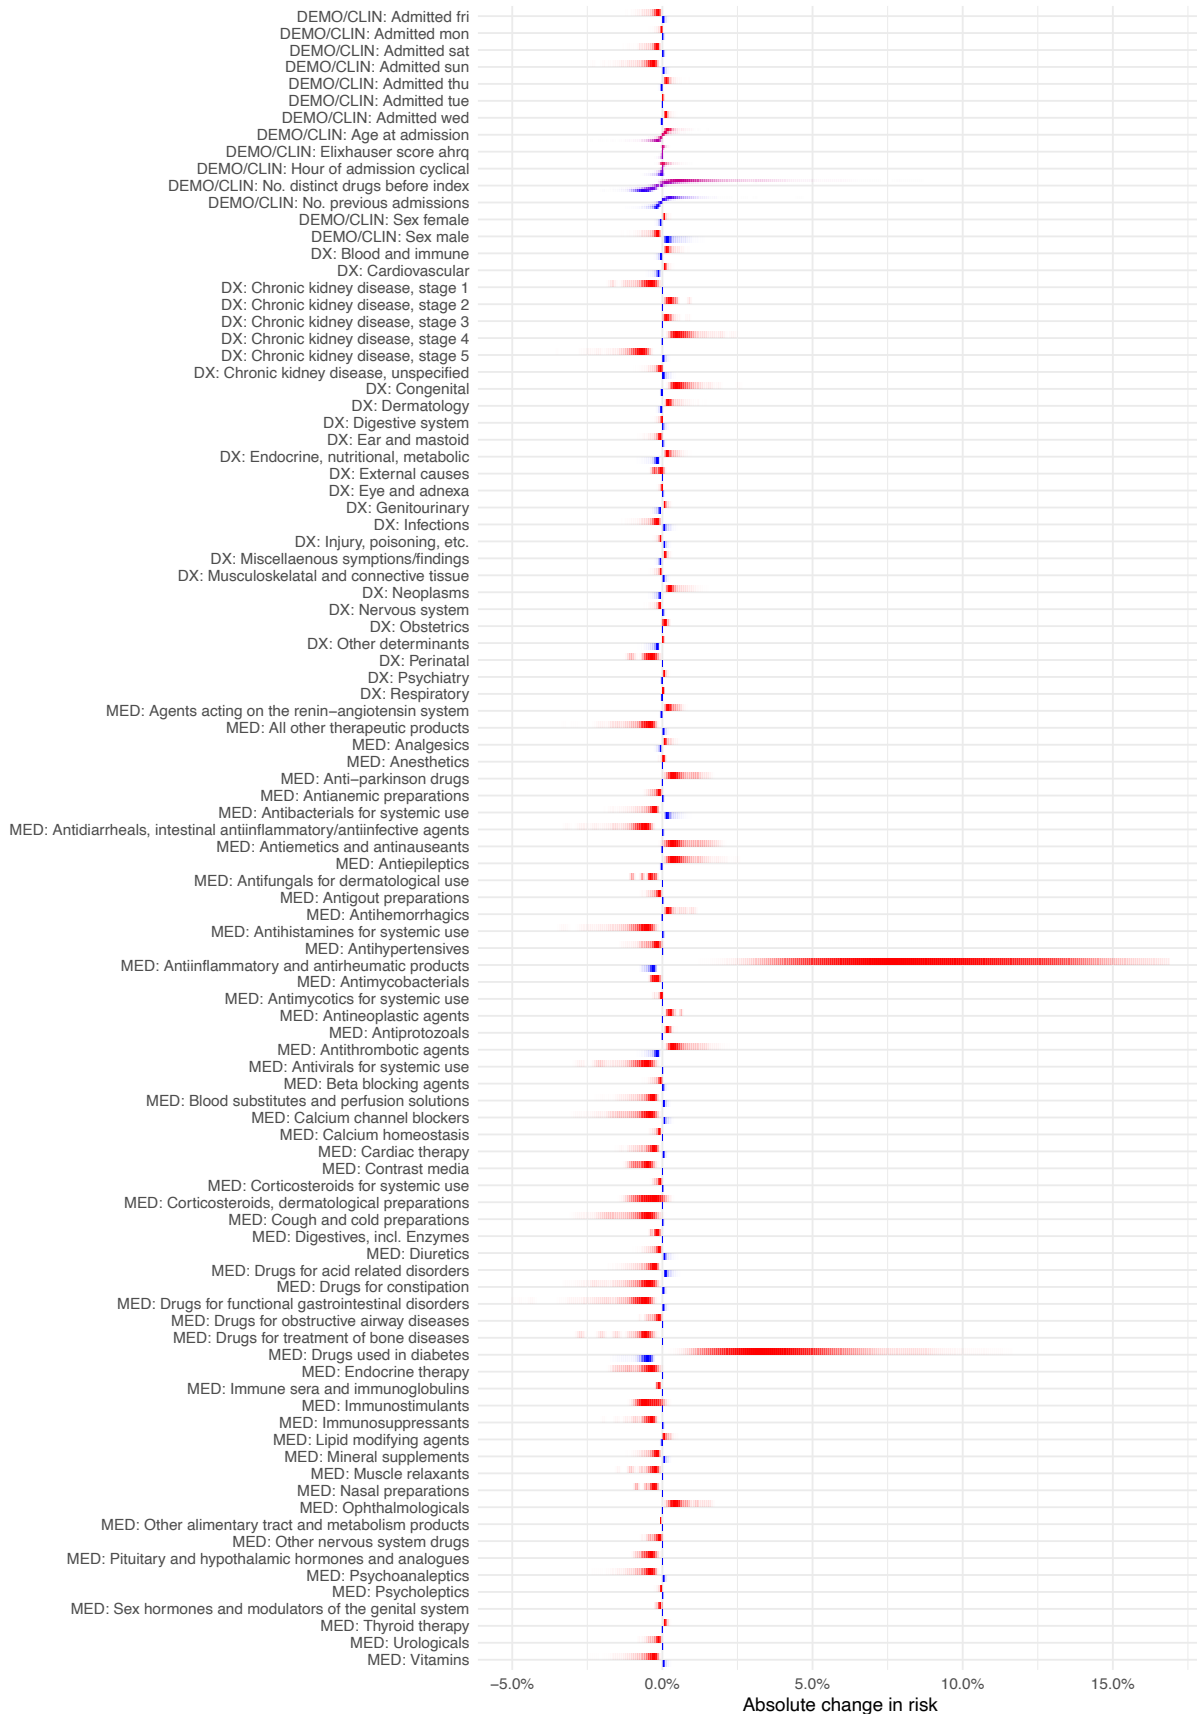





Figure S66: Linear, daily rate  $\geq 3$

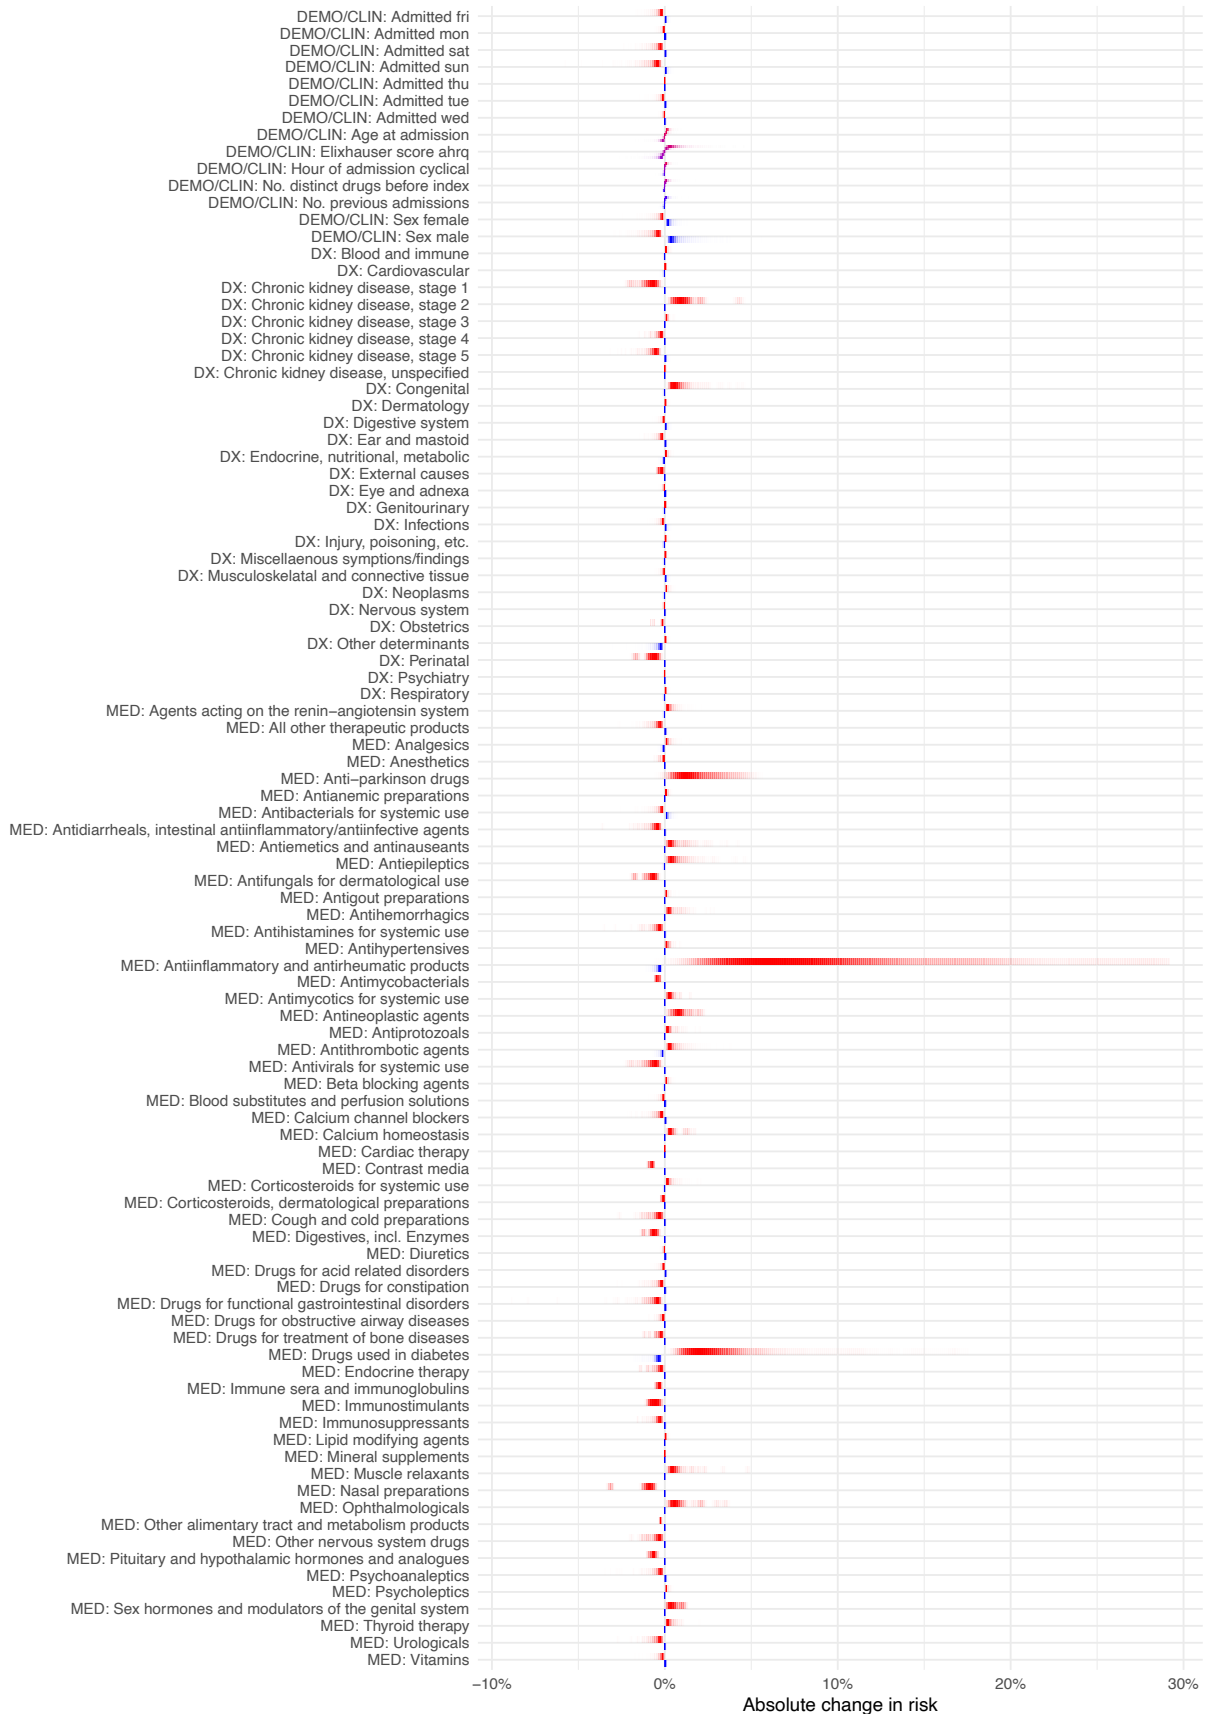



Figure S67: MLP, daily rate  $\geq 5$

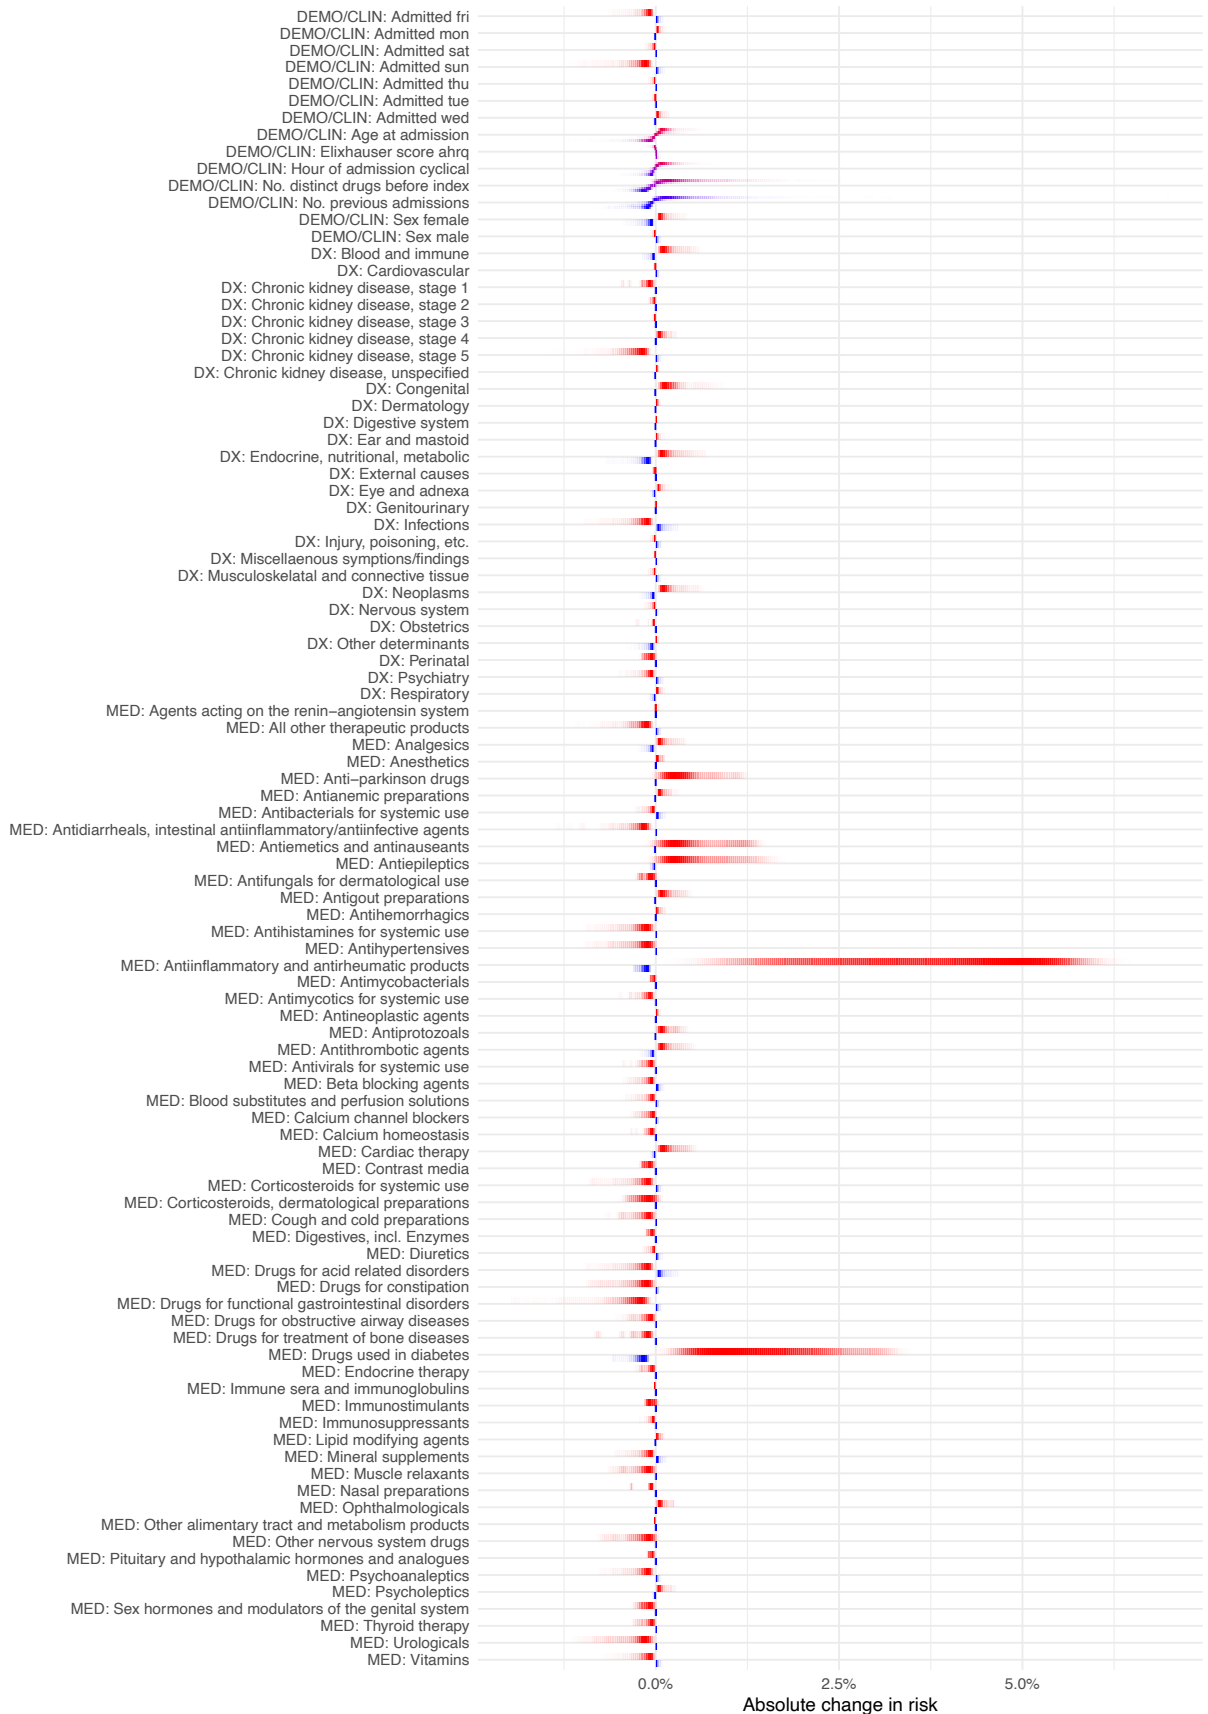



Figure S68: Linear, daily rate  $\geq 5$

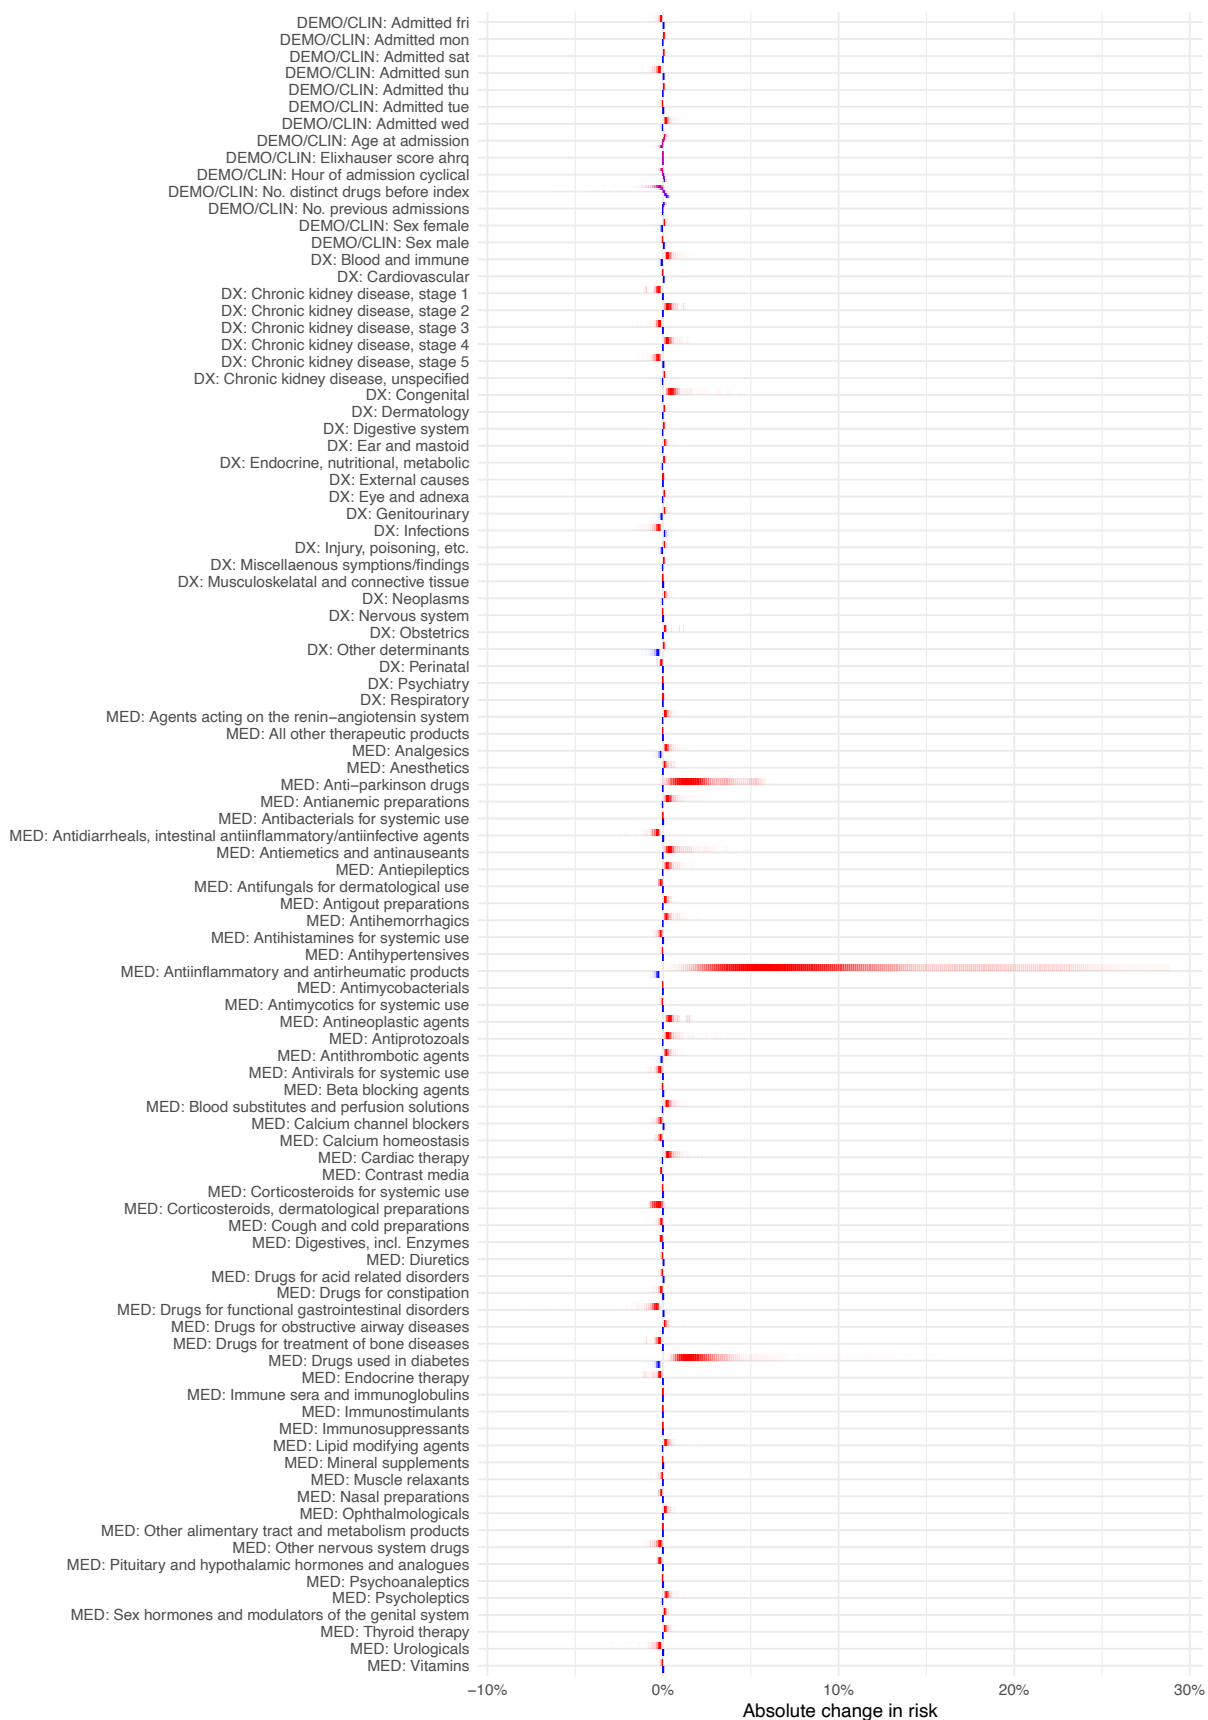



Figure S69: Ref. model, MLP, daily rate > 0

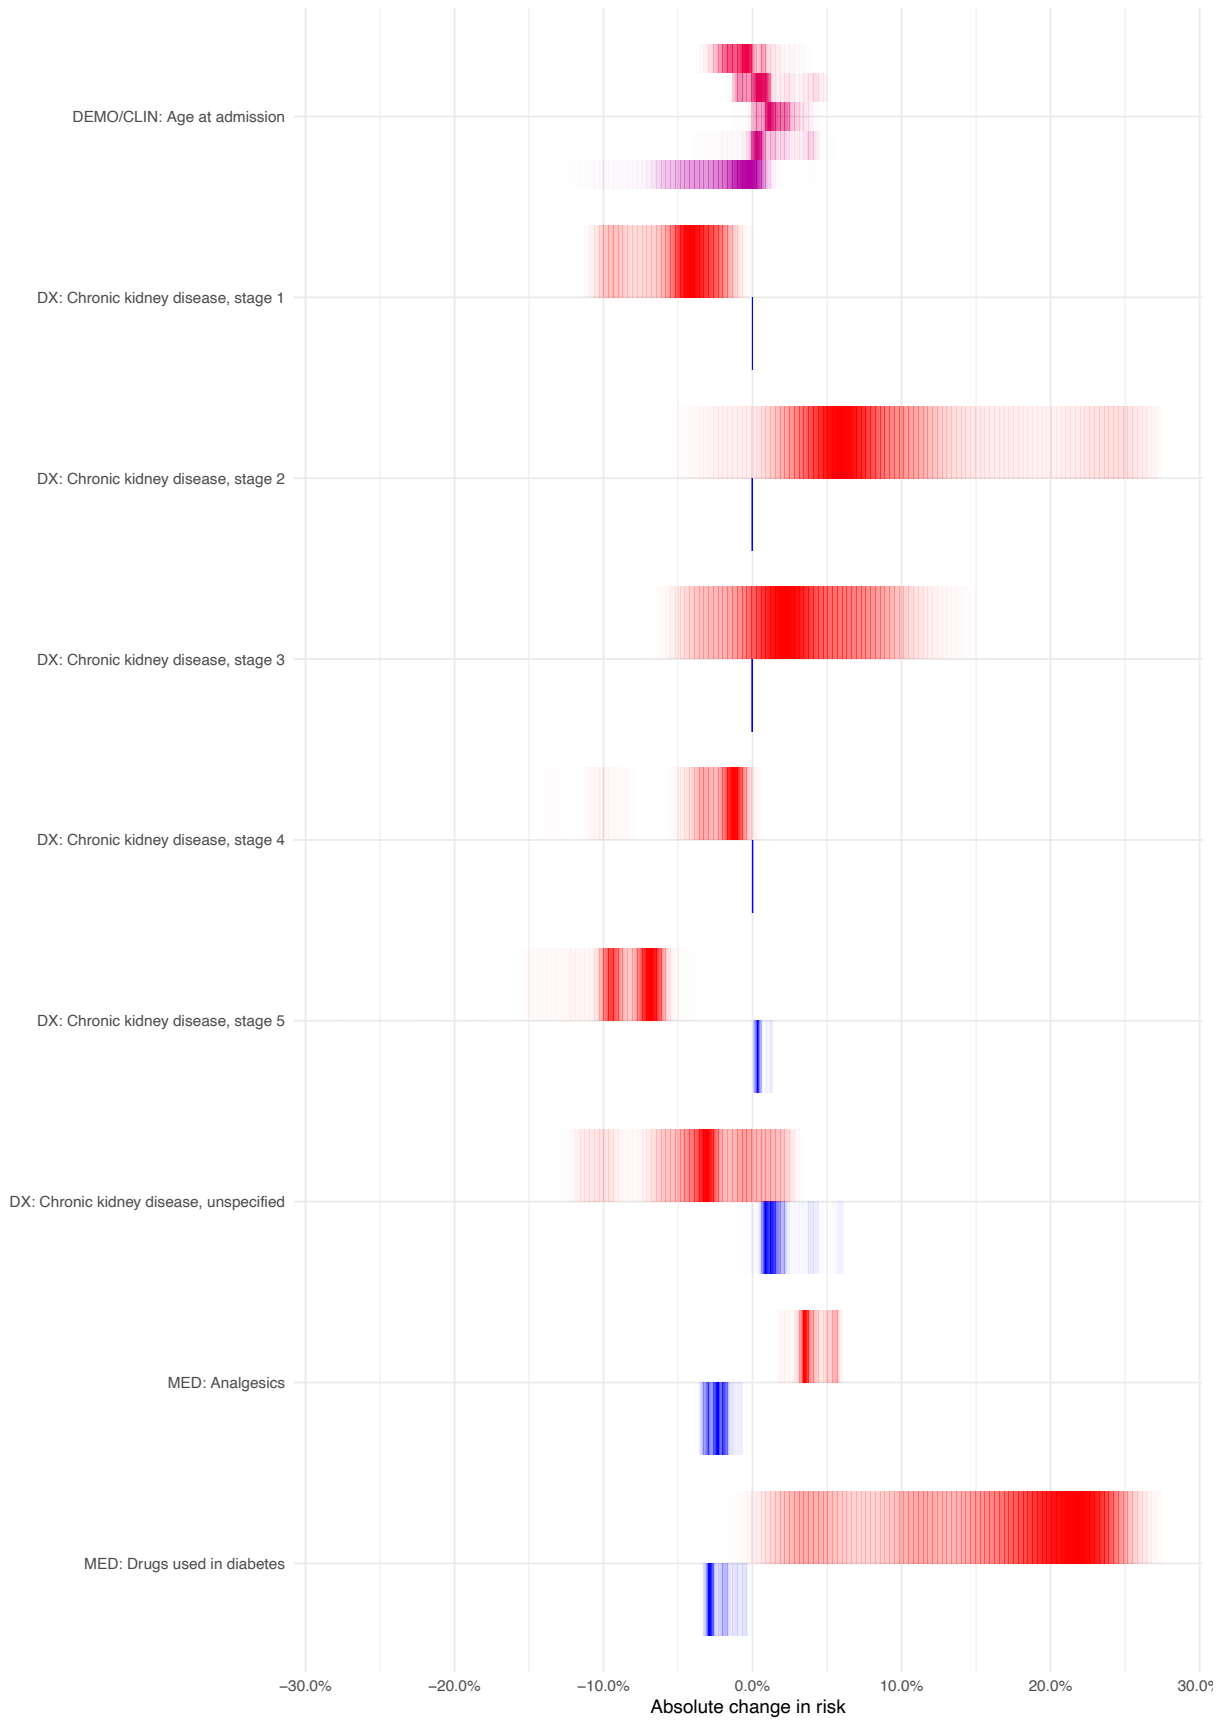





Figure S70: Ref. model, Linear, daily rate > 0

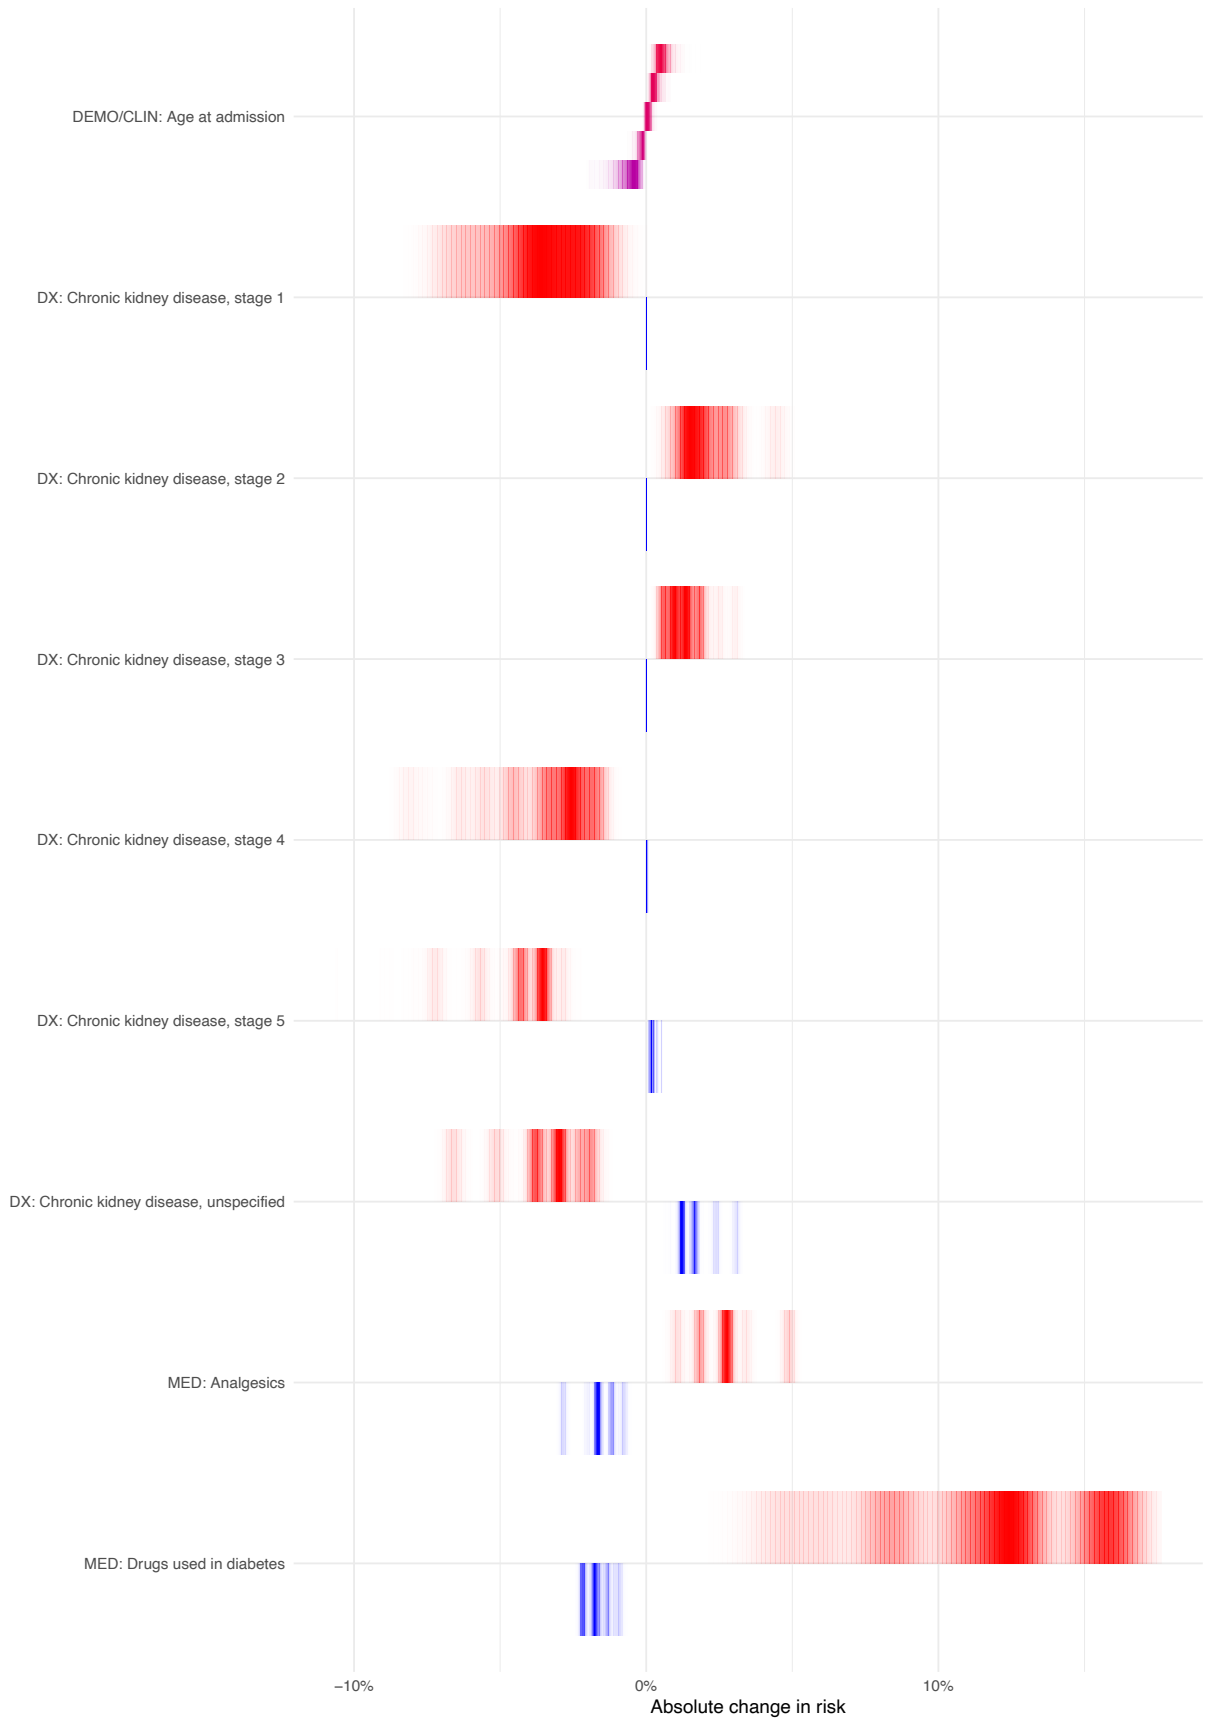



Figure S71: Ref. model, MLP, daily rate  $\geq 1$

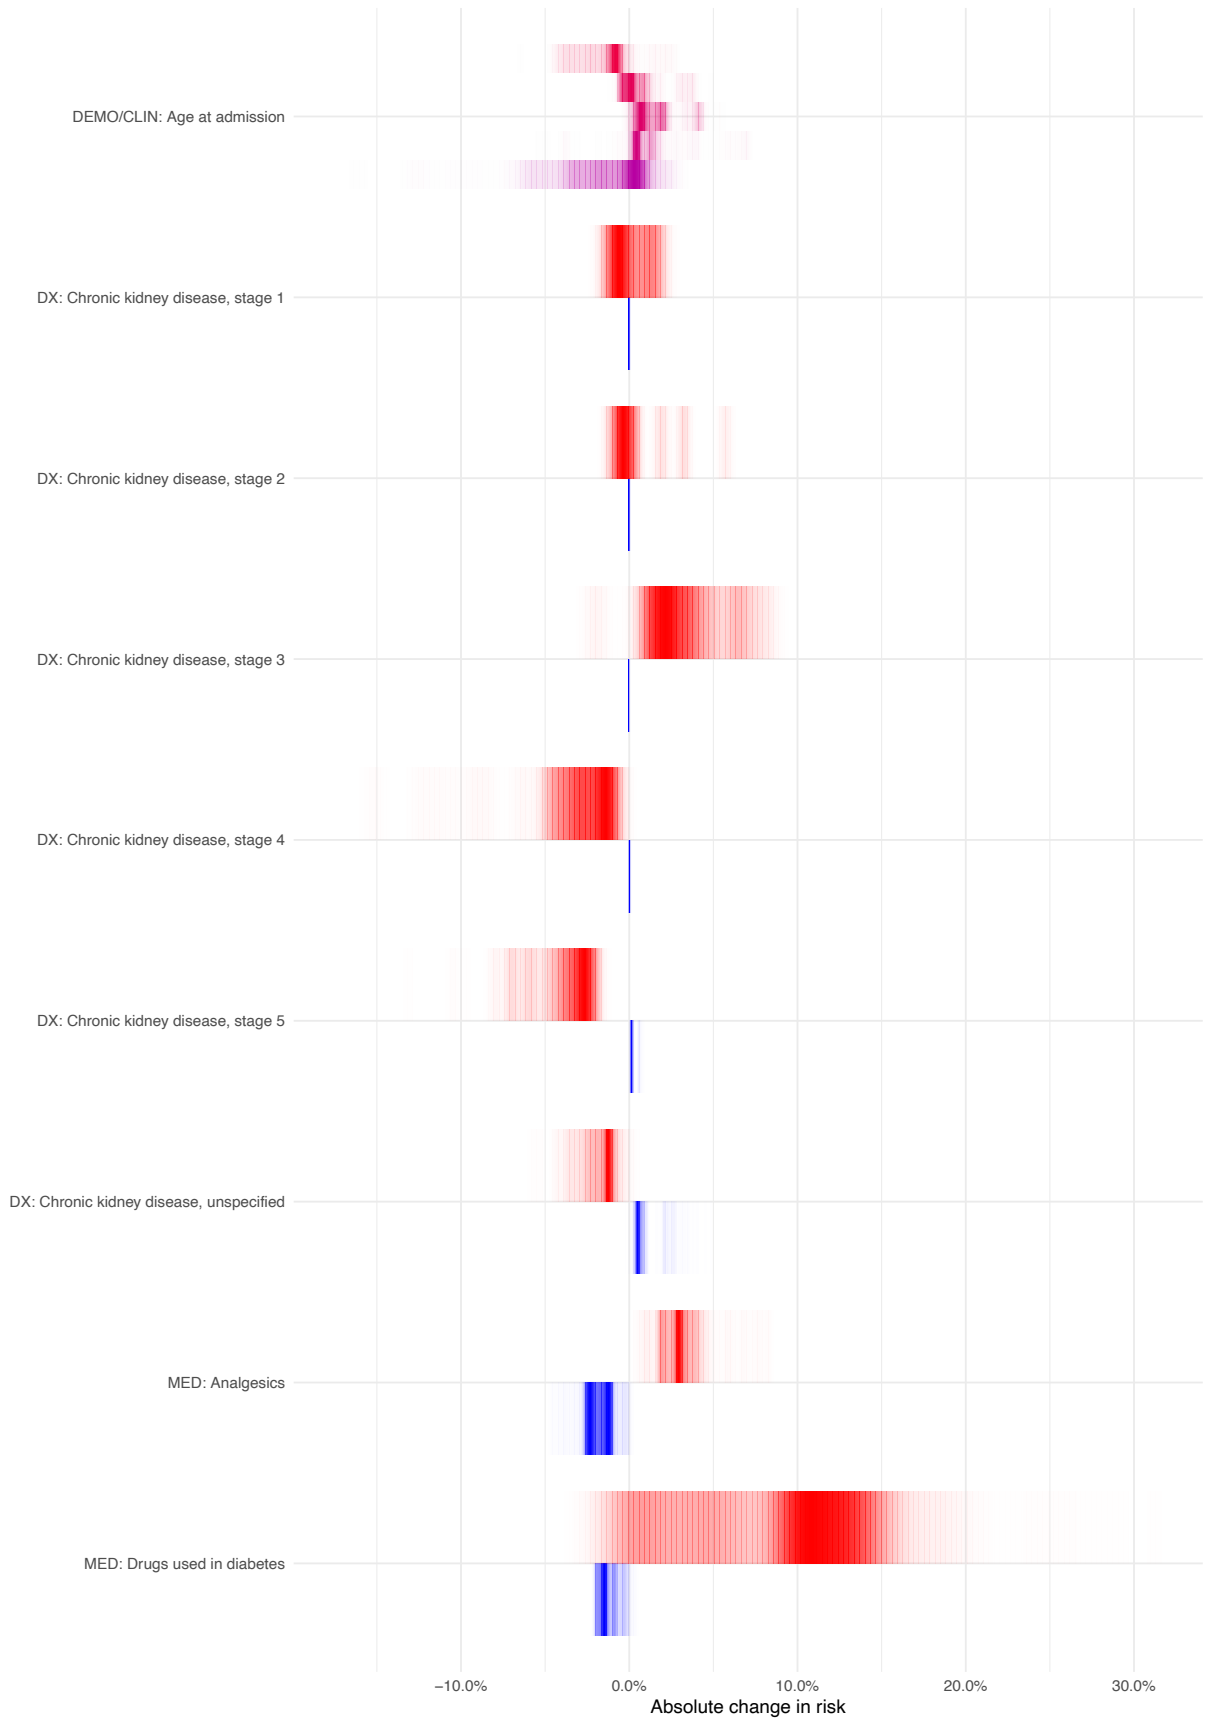



Figure S72: Ref. model, Linear, daily rate  $\geq 1$

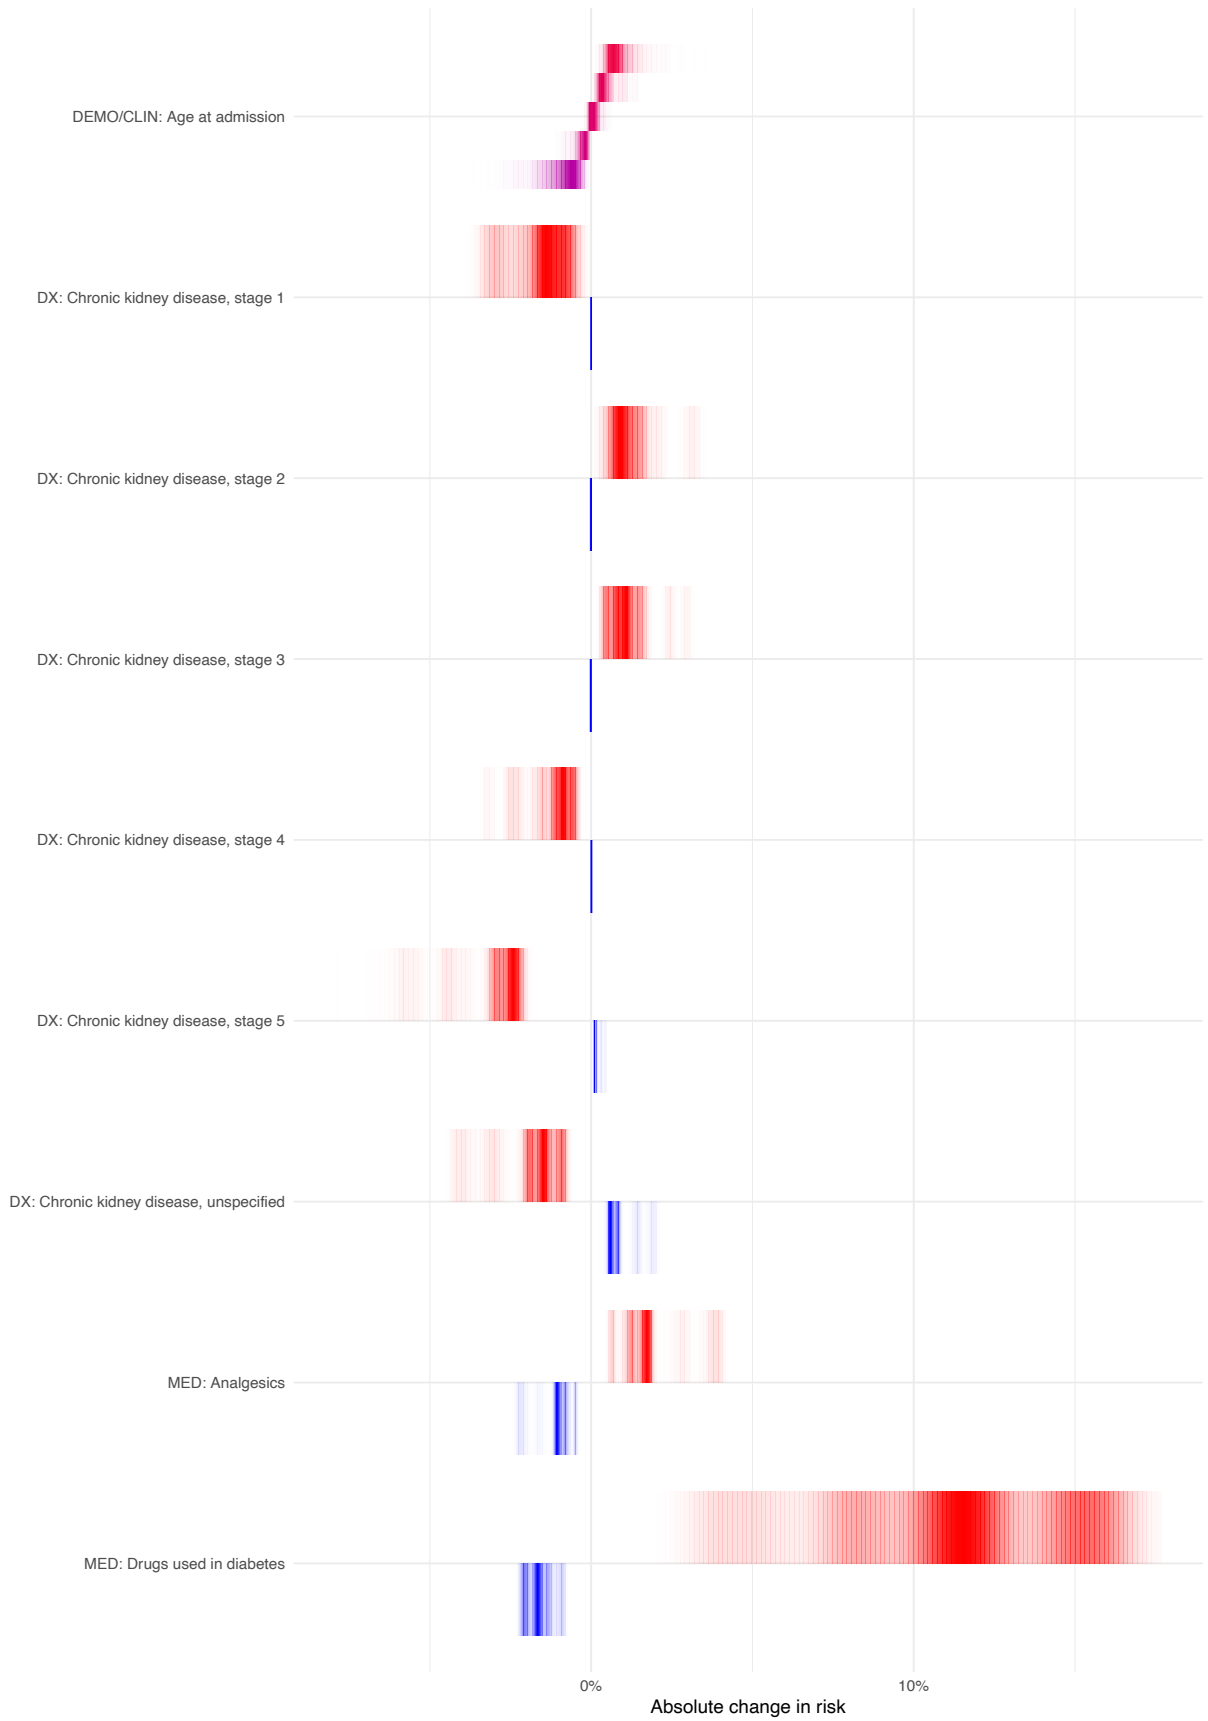

| Section/Topic                | Item | Checklist Item                                                                                                                                                                                        | Page                  |
|------------------------------|------|-------------------------------------------------------------------------------------------------------------------------------------------------------------------------------------------------------|-----------------------|
| <b>Title and abstract</b>    |      |                                                                                                                                                                                                       |                       |
| Title                        | 1    | Identify the study as developing and/or validating a multivariable prediction model, the target population, and the outcome to be predicted.                                                          | 1                     |
| Abstract                     | 2    | Provide a summary of objectives, study design, setting, participants, sample size, predictors, outcome, statistical analysis, results, and conclusions.                                               | 2-3                   |
| <b>Introduction</b>          |      |                                                                                                                                                                                                       |                       |
| Background and objectives    | 3a   | Explain the medical context (including whether diagnostic or prognostic) and rationale for developing or validating the multivariable prediction model, including references to existing models.      | 4-5                   |
|                              | 3b   | Specify the objectives, including whether the study describes the development or validation of the model or both.                                                                                     | 4-5                   |
| <b>Methods</b>               |      |                                                                                                                                                                                                       |                       |
| Source of data               | 4a   | Describe the study design or source of data (e.g., randomized trial, cohort, or registry data), separately for the development and validation data sets, if applicable.                               | 5                     |
|                              | 4b   | Specify the key study dates, including start of accrual; end of accrual; and, if applicable, end of follow-up.                                                                                        | 5                     |
| Participants                 | 5a   | Specify key elements of the study setting (e.g., primary care, secondary care, general population) including number and location of centres.                                                          | 5                     |
|                              | 5b   | Describe eligibility criteria for participants.                                                                                                                                                       | 5                     |
|                              | 5c   | Give details of treatments received, if relevant.                                                                                                                                                     | —                     |
| Outcome                      | 6a   | Clearly define the outcome that is predicted by the prediction model, including how and when assessed.                                                                                                | 6-7                   |
|                              | 6b   | Report any actions to blind assessment of the outcome to be predicted.                                                                                                                                | —                     |
| Predictors                   | 7a   | Clearly define all predictors used in developing or validating the multivariable prediction model, including how and when they were measured.                                                         | 6-7                   |
|                              | 7b   | Report any actions to blind assessment of predictors for the outcome and other predictors.                                                                                                            | —                     |
| Sample size                  | 8    | Explain how the study size was arrived at.                                                                                                                                                            | Fore-gone             |
| Missing data                 | 9    | Describe how missing data were handled (e.g., complete-case analysis, single imputation, multiple imputation) with details of any imputation method.                                                  | 7                     |
| Statistical analysis methods | 10a  | Describe how predictors were handled in the analyses.                                                                                                                                                 | 6-7                   |
|                              | 10b  | Specify type of model, all model-building procedures (including any predictor selection), and method for internal validation.                                                                         | 7-9                   |
|                              | 10d  | Specify all measures used to assess model performance and, if relevant, to compare multiple models.                                                                                                   | 9                     |
| Risk groups                  | 11   | Provide details on how risk groups were created, if done.                                                                                                                                             | —                     |
| <b>Results</b>               |      |                                                                                                                                                                                                       |                       |
| Participants                 | 13a  | Describe the flow of participants through the study, including the number of participants with and without the outcome and, if applicable, a summary of the follow-up time. A diagram may be helpful. | 10 + table 1          |
|                              | 13b  | Describe the characteristics of the participants (basic demographics, clinical features, available predictors), including the number of participants with missing data for predictors and outcome.    | 10 + table 1          |
| Model development            | 14a  | Specify the number of participants and outcome events in each analysis.                                                                                                                               | Table 1               |
|                              | 14b  | If done, report the unadjusted association between each candidate predictor and outcome.                                                                                                              | —                     |
| Model specification          | 15a  | Present the full prediction model to allow predictions for individuals (i.e., all regression coefficients, and model intercept or baseline survival at a given time point).                           | Avail. online in repo |
|                              | 15b  | Explain how to use the prediction model.                                                                                                                                                              | —                     |
| Model performance            | 16   | Report performance measures (with CIs) for the prediction model.                                                                                                                                      | Table 2 (no CIs)      |
| <b>Discussion</b>            |      |                                                                                                                                                                                                       |                       |
| Limitations                  | 18   | Discuss any limitations of the study (such as nonrepresentative sample, few events per predictor, missing data).                                                                                      | 14-15                 |
| Interpretation               | 19b  | Give an overall interpretation of the results, considering objectives, limitations, and results from similar studies, and other relevant evidence.                                                    | 12-14                 |
| Implications                 | 20   | Discuss the potential clinical use of the model and implications for future research.                                                                                                                 | 15                    |
| <b>Other information</b>     |      |                                                                                                                                                                                                       |                       |
| Supplementary information    | 21   | Provide information about the availability of supplementary resources, such as study protocol, Web calculator, and data sets.                                                                         | —                     |
| Funding                      | 22   | Give the source of funding and the role of the funders for the present study.                                                                                                                         | 16                    |
